# Supplementary material for: Mild Copper-Catalyzed, l-Proline-Promoted Cross-Coupling of Methyl 3-Amino-1-benzothiophene-2-carboxylate
Source: MDPI journal article supplement (doi:10.3390/molecules26226822), 2021-11-11
Supplement: s1 [file s1]

## **Mild Copper-Catalyzed, *L*-Proline-Promoted Cross Coupling of Methyl 3-Amino-1-benzothiophene-2-carboxylate**

Vilija Kederienė <sup>1,\*</sup>, Indrė Jaglinskaitė <sup>1</sup>, Paulina Voznikaitė <sup>1</sup>, Jolanta Rousseau <sup>2</sup>, Patrick Rollin <sup>3</sup>, Algirdas Šačkus <sup>1</sup> and Arnaud Tatibouët <sup>3,\*</sup>

<sup>1</sup> Department of Organic Chemistry, Kaunas University of Technology, Radvilėnų pl. 19, LT-50254 Kaunas, Lithuania;

<sup>2</sup> Univ. Artois, CNRS, Centrale Lille, Univ. Lille, UMR 8181 – UCCS – Unité de Catalyse et Chimie du Solide, F-62300 Lens, France;

<sup>3</sup> Université d'Orléans et CNRS, ICOA, UMR 7311, BP 6759, F-45067 Orléans France.

\* Corresponding authors

E-mail address: vilija.kederiene@ktu.lt (V. Kederienė); arnaud.tatibouet@univ-orleans.fr (A. Tatibouët)

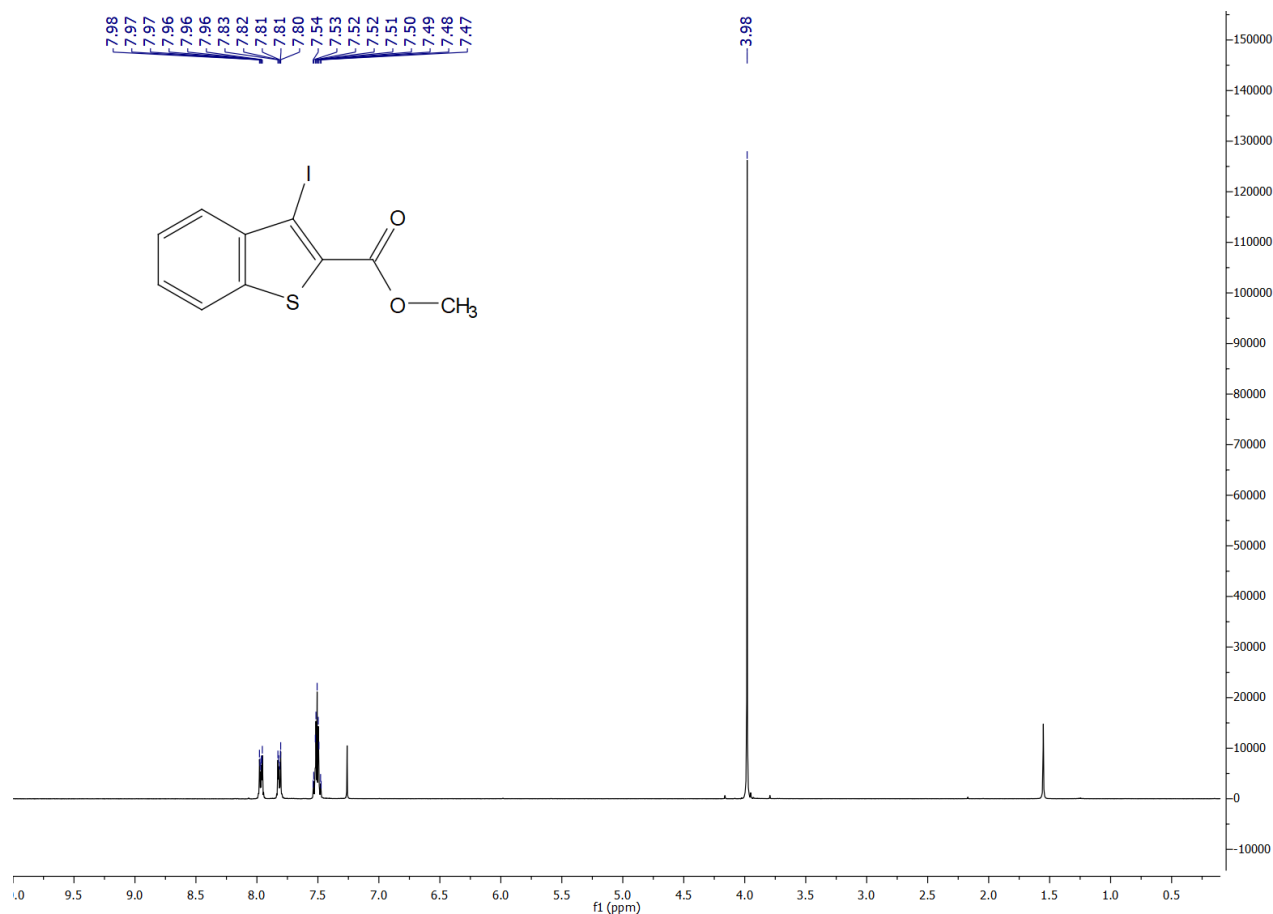

**Figure S1. Methyl-3-iodo-1-benzothiophene-2-carboxylate (2). <sup>1</sup>H NMR spectrum (400 MHz, CDCl<sub>3</sub>).**

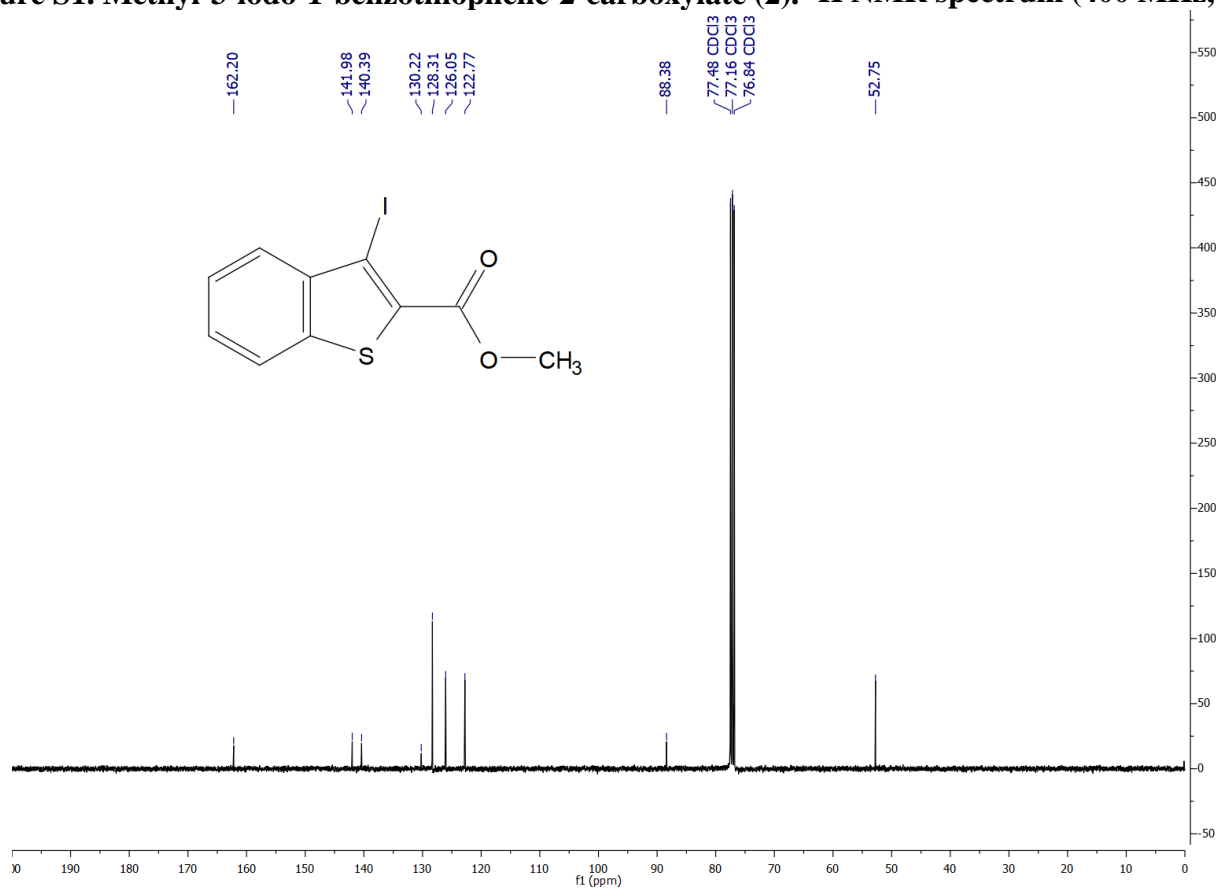

**Figure S2. Methyl-3-iodo-1-benzothiophene-2-carboxylate (2). <sup>13</sup>C NMR spectrum (100 MHz, CDCl<sub>3</sub>).**

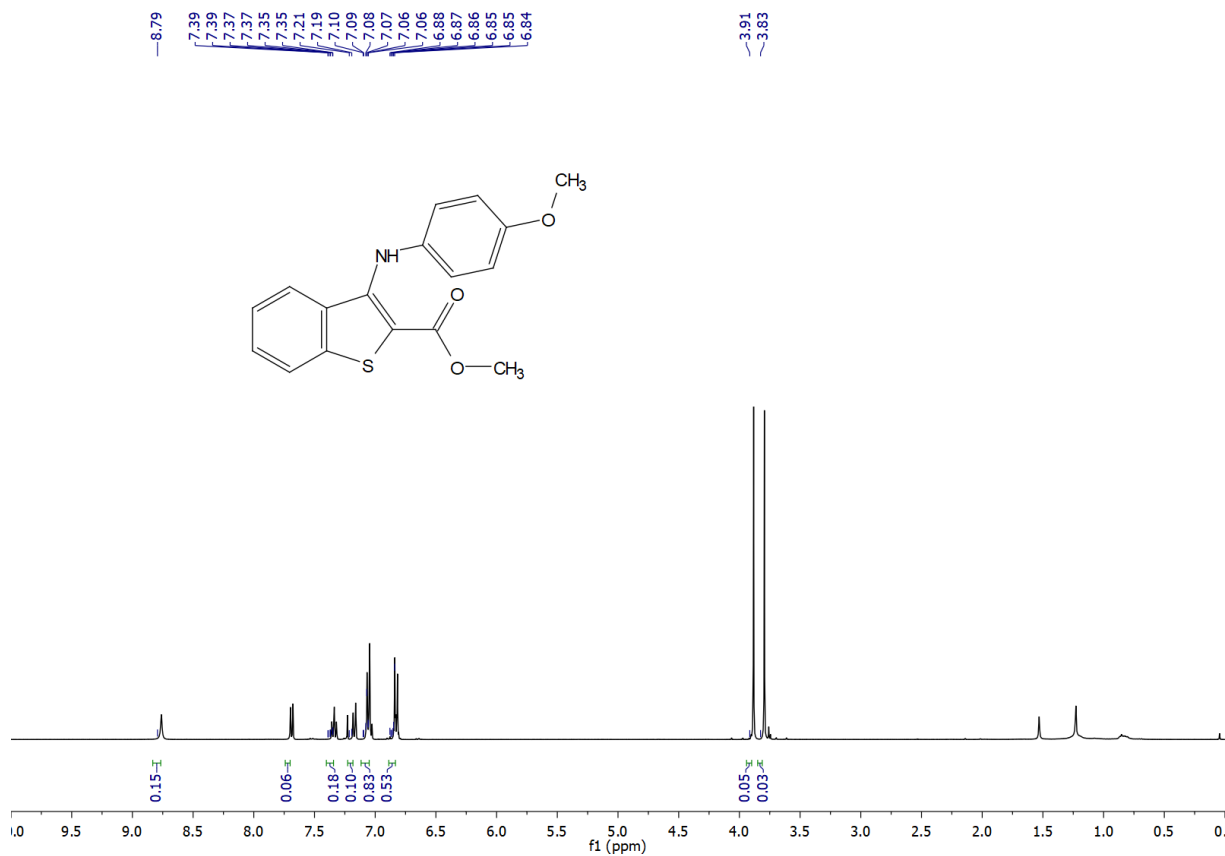

**Figure S3.** Methyl 3-[(4-methoxyphenyl)amino]-1-benzothiophene-2-carboxylate (3a). <sup>1</sup>H NMR spectrum (400 MHz, CDCl<sub>3</sub>).

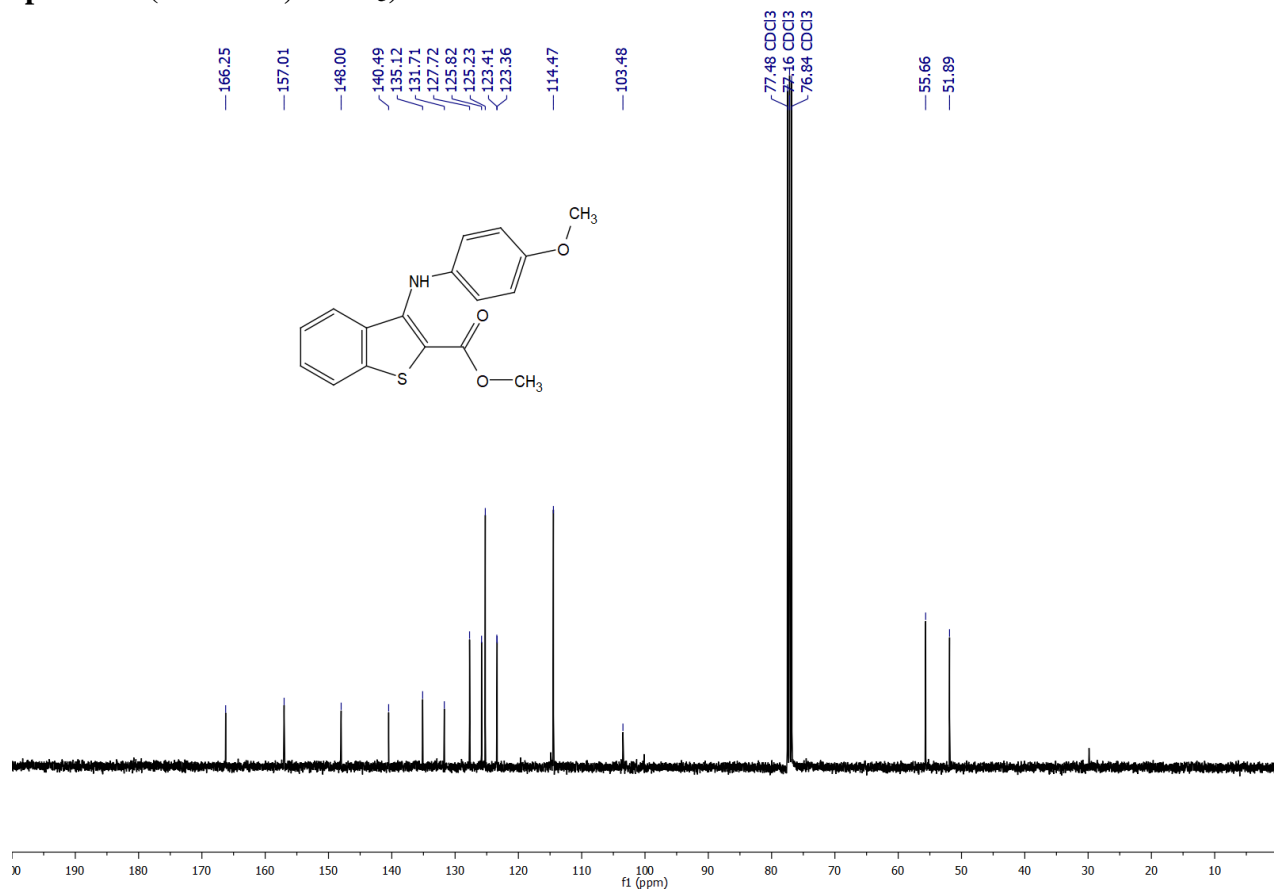

**Figure S4.** Methyl 3-[(4-methoxyphenyl)amino]-1-benzothiophene-2-carboxylate (3a). <sup>13</sup>C NMR spectrum (100 MHz, CDCl<sub>3</sub>).

**Acquisition Parameter**

|             |          |                       |            |                  |           |
|-------------|----------|-----------------------|------------|------------------|-----------|
| Source Type | ESI      | Ion Polarity          | Positive   | Set Nebulizer    | 0.6 Bar   |
| Focus       | Active   | Set Capillary         | 4500 V     | Set Dry Heater   | 200 °C    |
| Scan Begin  | 50 m/z   | Set End Plate Offset  | -500 V     | Set Dry Gas      | 7.0 l/min |
| Scan End    | 1850 m/z | Set Collision Cell RF | 2500.0 Vpp | Set Divert Valve | Waste     |

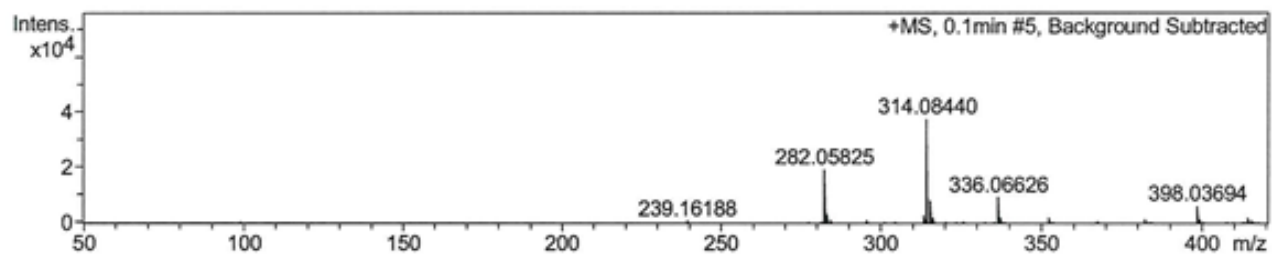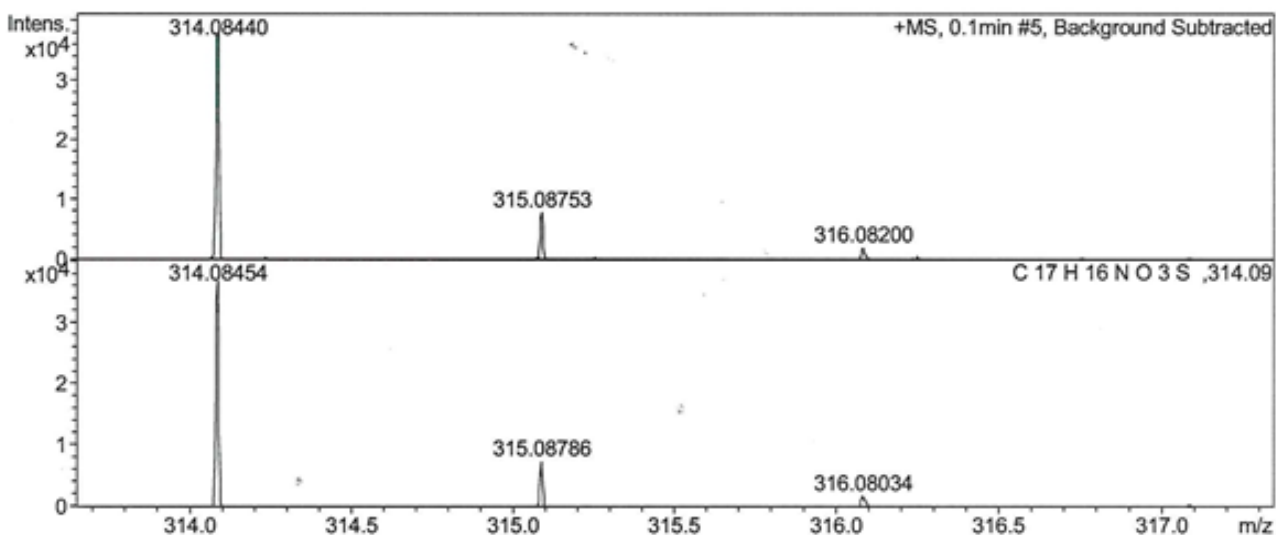

| Meas. m/z | # | Formula              | m/z       | err [ppm] | mSigma | rdB  | e <sup>-</sup> Conf | N-Rule |
|-----------|---|----------------------|-----------|-----------|--------|------|---------------------|--------|
| 282.05825 | 1 | C 16 H 12 N O 2 S    | 282.05833 | 0.27      | 33.6   | 11.5 | even                | ok     |
| 314.08440 | 1 | C 17 H 16 N O 3 S    | 314.08454 | 0.46      | 11.6   | 10.5 | even                | ok     |
| 336.06626 | 1 | C 17 H 15 N Na O 3 S | 336.06649 | 0.68      | 35.6   | 10.5 | even                | ok     |

**Figure S5.** Methyl 3-[(4-methoxyphenyl)amino]-1-benzothiophene-2-carboxylate (3a). HRMS (ESI).

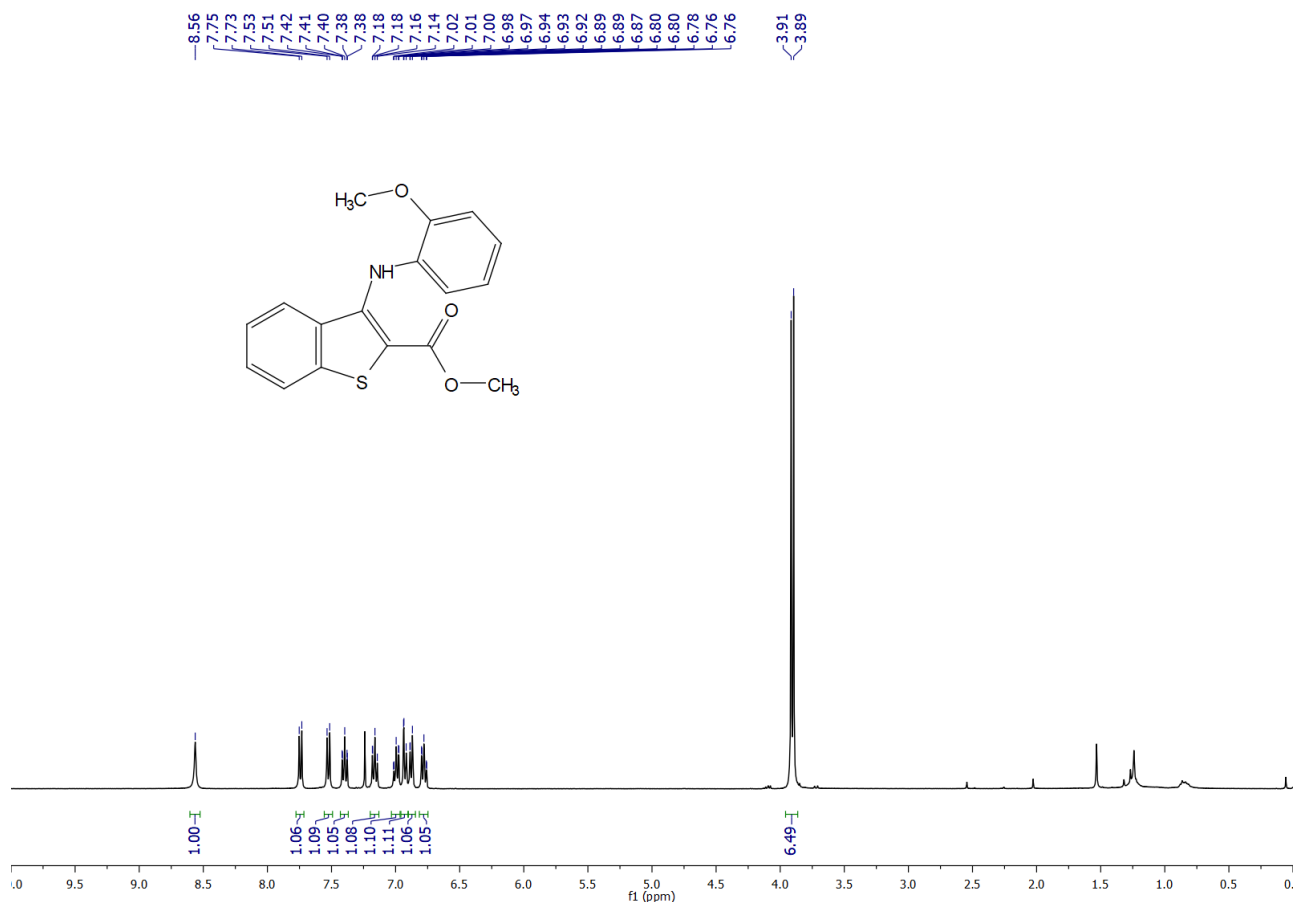

**Figure S6. Methyl 3-[(2-methoxyphenyl)amino]-1-benzothiophene-2-carboxylate (3b). <sup>1</sup>H NMR spectrum (400 MHz, CDCl<sub>3</sub>).**

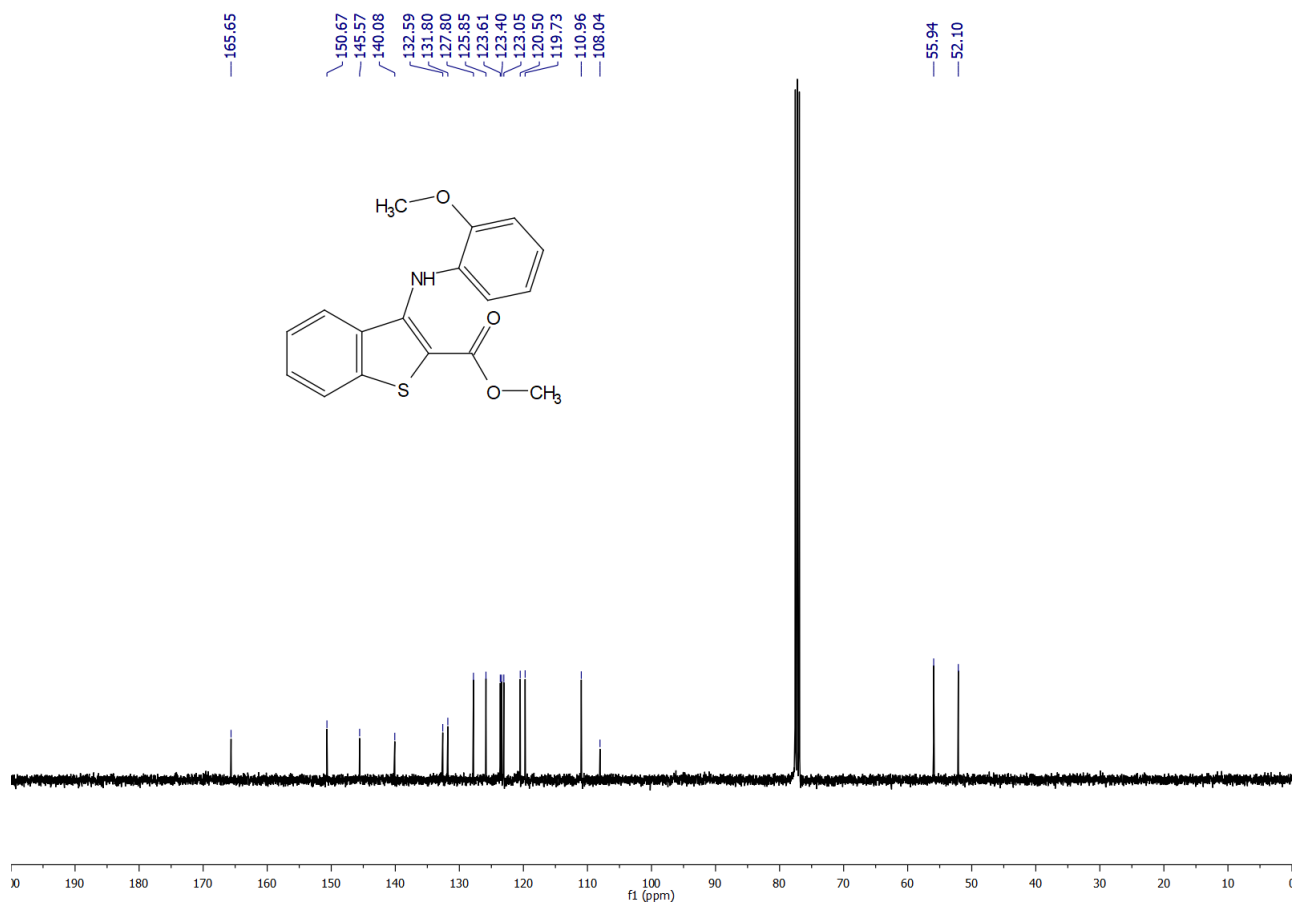

**Figure S7. Methyl 3-[(2-methoxyphenyl)amino]-1-benzothiophene-2-carboxylate (3b). <sup>13</sup>C NMR spectrum (100 MHz, CDCl<sub>3</sub>).**

**Acquisition Parameter**

|             |          |                       |            |                  |           |
|-------------|----------|-----------------------|------------|------------------|-----------|
| Source Type | ESI      | Ion Polarity          | Positive   | Set Nebulizer    | 0.6 Bar   |
| Focus       | Active   | Set Capillary         | 4500 V     | Set Dry Heater   | 200 °C    |
| Scan Begin  | 50 m/z   | Set End Plate Offset  | -500 V     | Set Dry Gas      | 7.0 l/min |
| Scan End    | 1850 m/z | Set Collision Cell RF | 2500.0 Vpp | Set Divert Valve | Waste     |

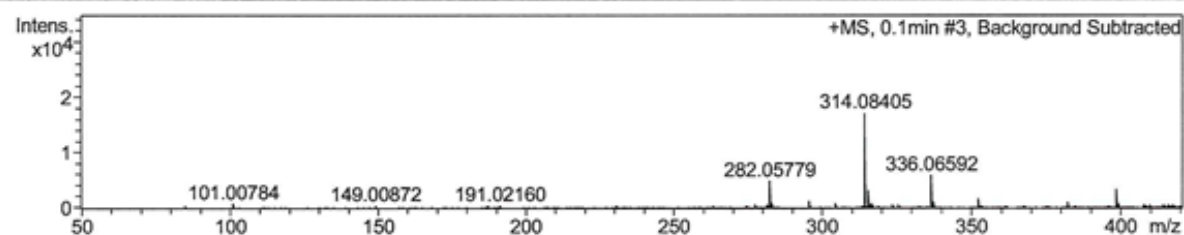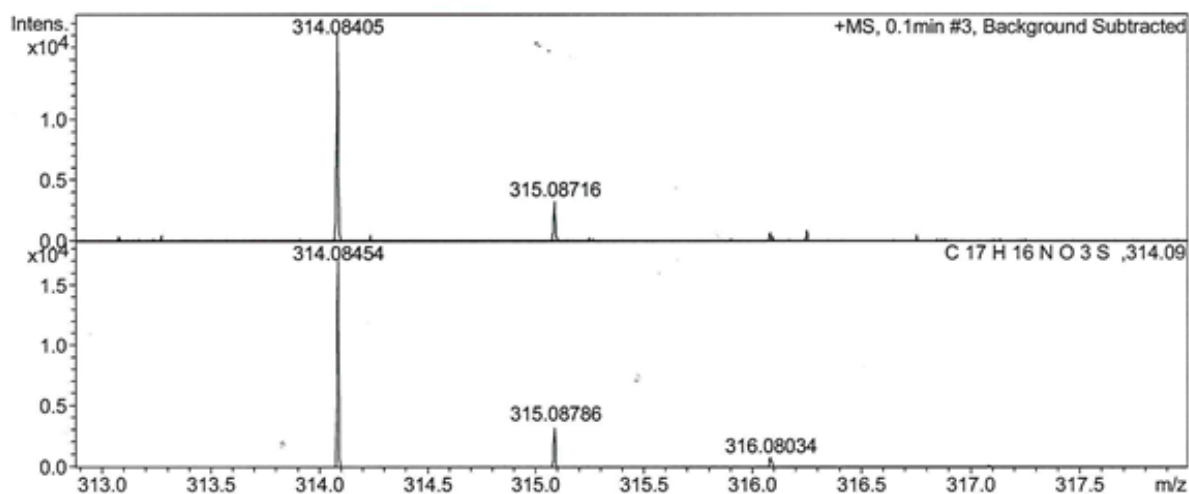

| Meas. m/z | # | Formula           | m/z       | err [ppm] | mSigma | rdb  | e <sup>-</sup> Conf | N-Rule |
|-----------|---|-------------------|-----------|-----------|--------|------|---------------------|--------|
| 314.08405 | 1 | C 17 H 16 N O 3 S | 314.08454 | 1.56      | 35.1   | 10.5 | even                | ok     |

**Figure S8. Methyl 3-[(2-methoxyphenyl)amino]-1-benzothiophene-2-carboxylate (3b). HRMS (ESI).**

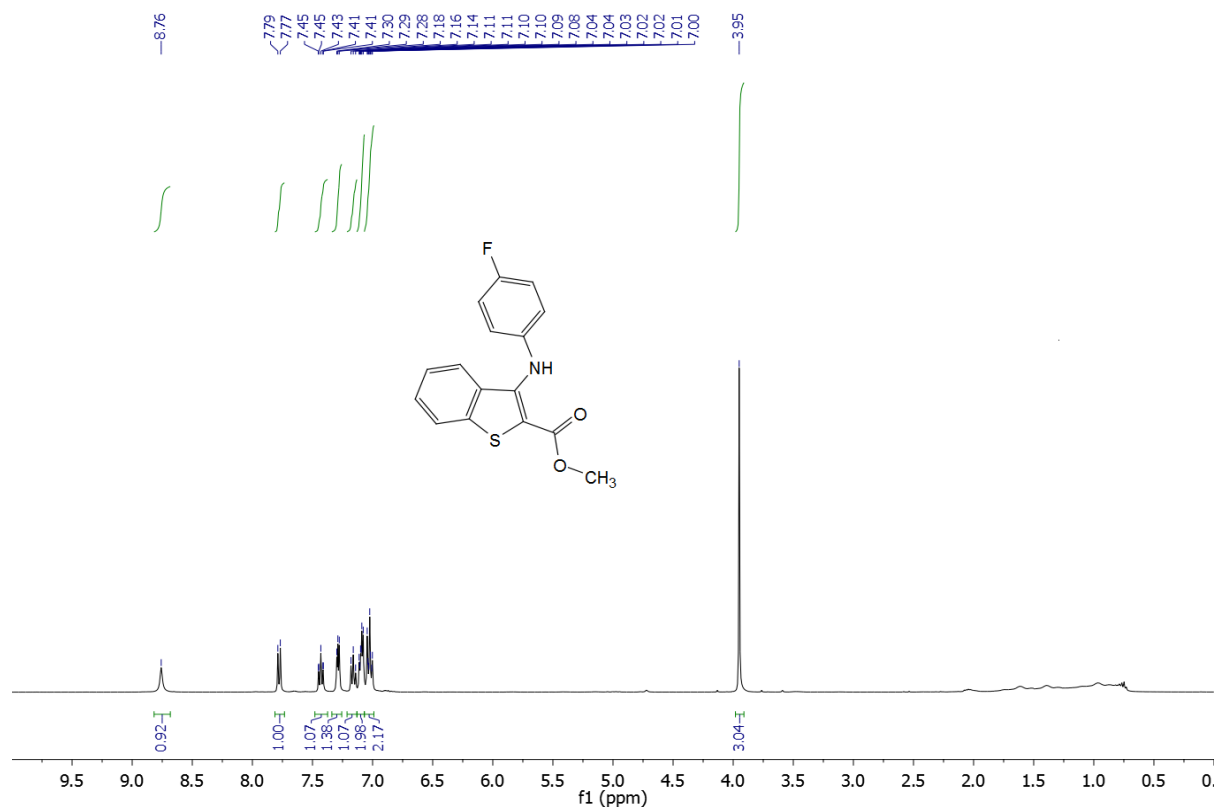

**Figure S9. Methyl 3-[(4-fluorophenyl)amino]-1-benzothiophene-2-carboxylate (3c). <sup>1</sup>H NMR spectrum (400 MHz, CDCl<sub>3</sub>).**

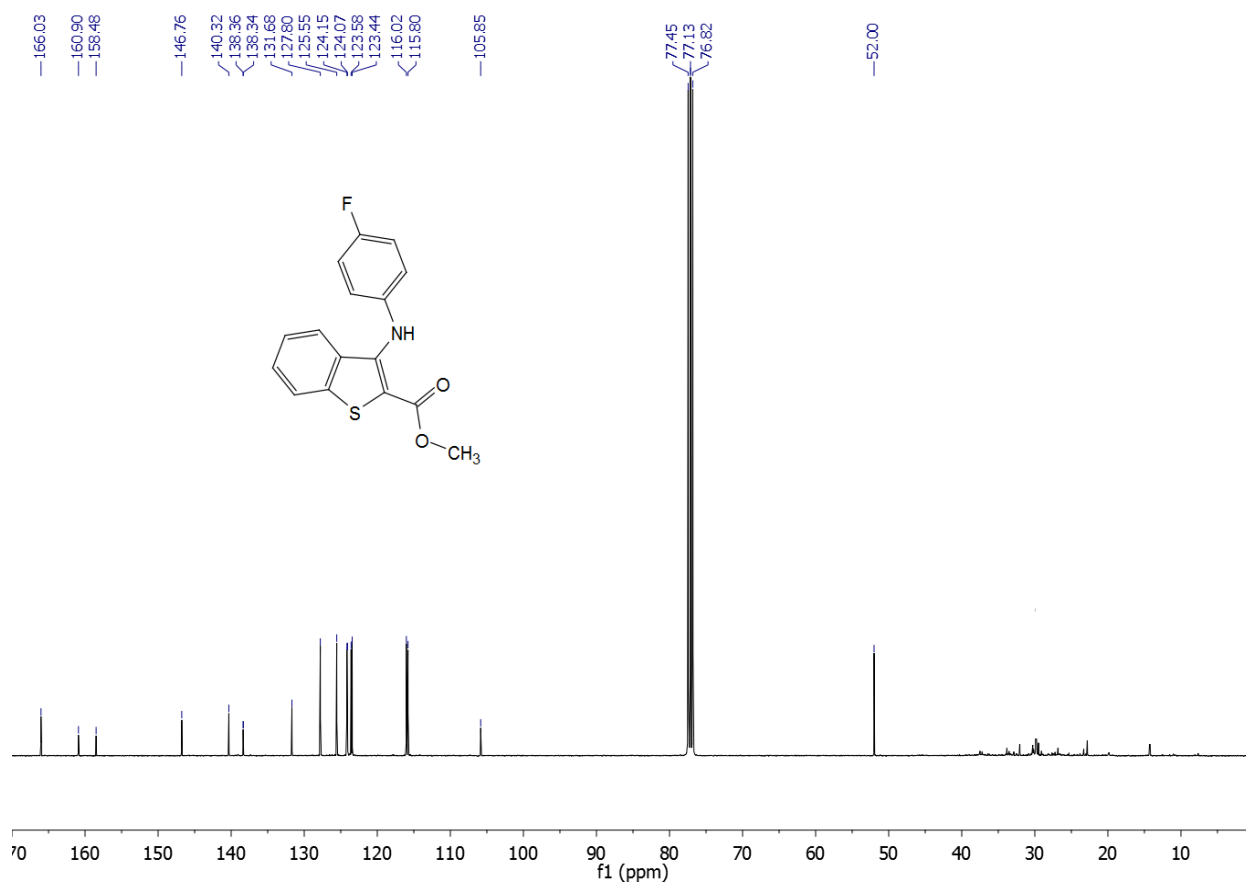

**Figure S10. Methyl 3-[(4-fluorophenyl)amino]-1-benzothiophene-2-carboxylate (3c). <sup>13</sup>C NMR spectrum (100 MHz, CDCl<sub>3</sub>).**

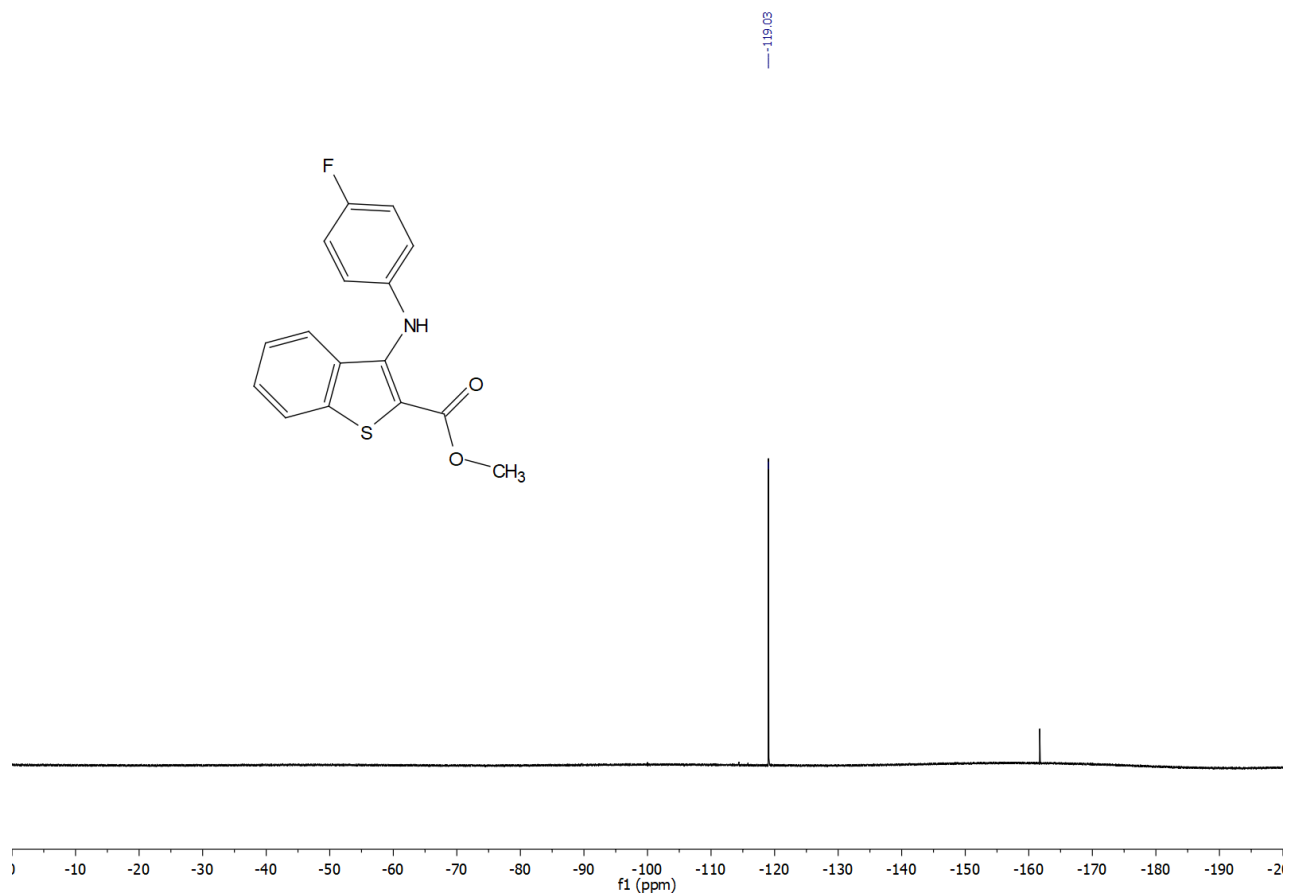

**Figure S11. Methyl 3-[(4-fluorophenyl)amino]-1-benzothiophene-2-carboxylate (3c). <sup>19</sup>F NMR spectrum (100 MHz, CDCl<sub>3</sub>).**

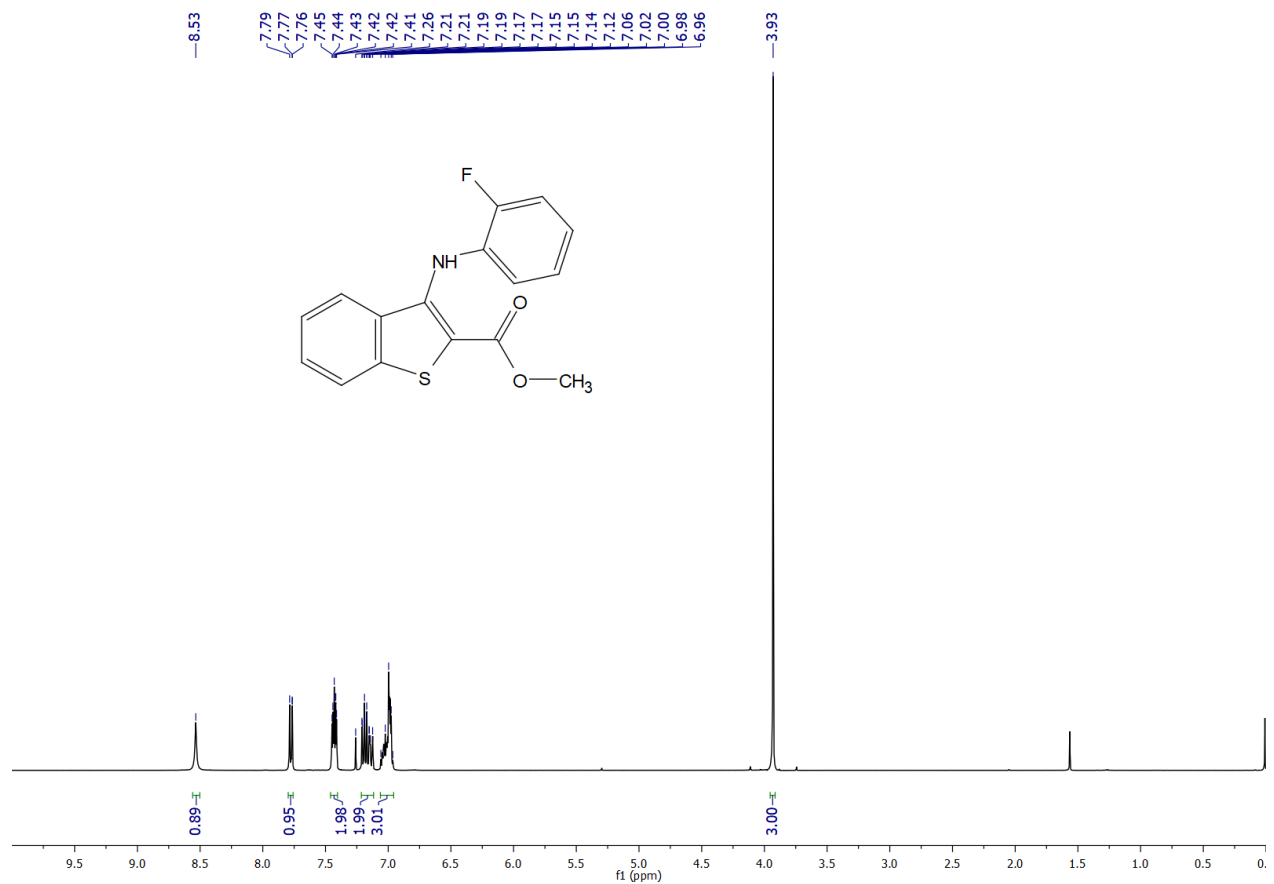

**Figure S12. Methyl 3-[(2-fluorophenyl)amino]-1-benzothiophene-2-carboxylate (3d). <sup>1</sup>H NMR spectrum (400 MHz, CDCl<sub>3</sub>).**



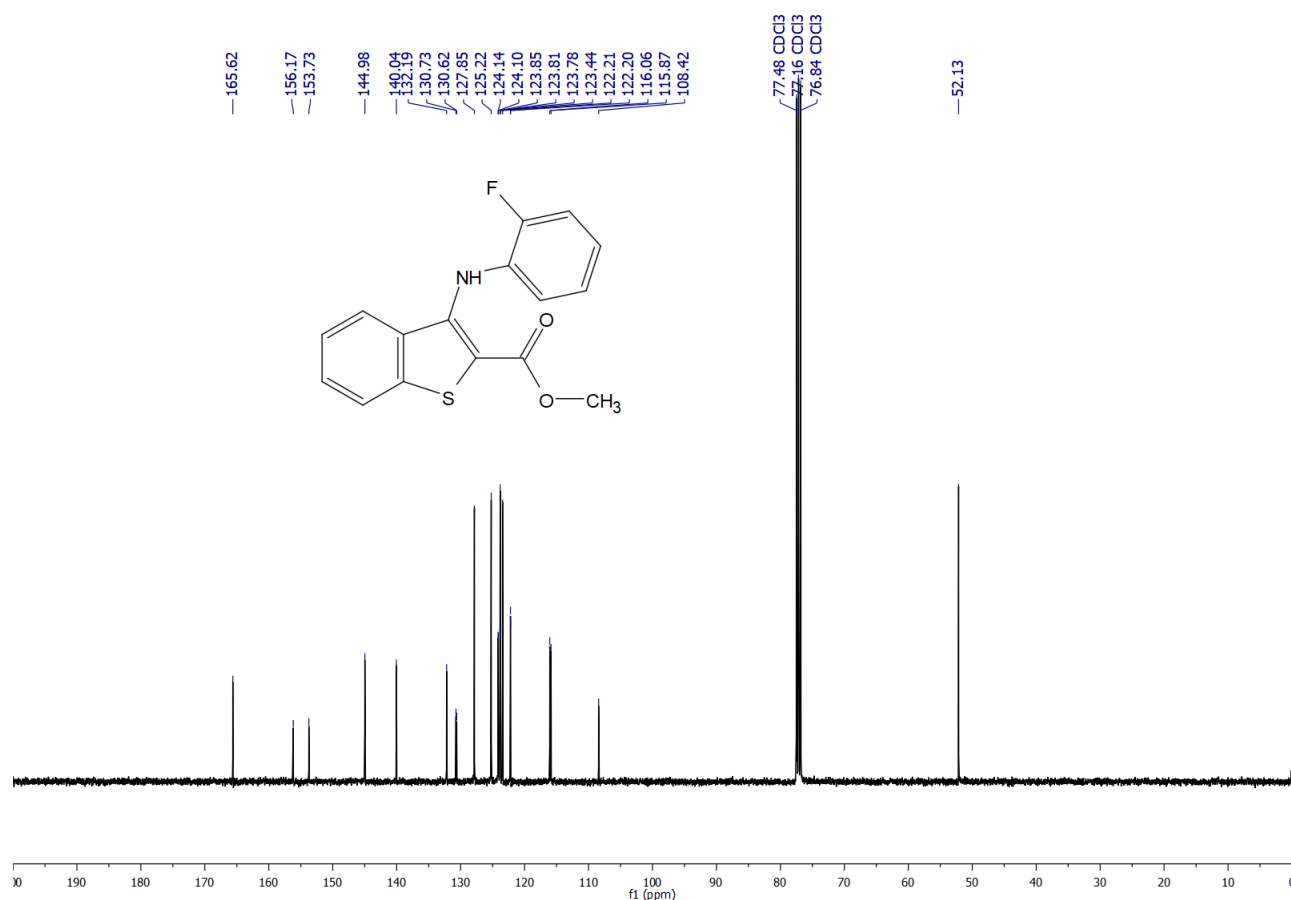

**Figure S13.** Methyl 3-[(2-fluorophenyl)amino]-1-benzothiophene-2-carboxylate (3d). <sup>13</sup>C NMR spectrum (100 MHz, CDCl<sub>3</sub>).

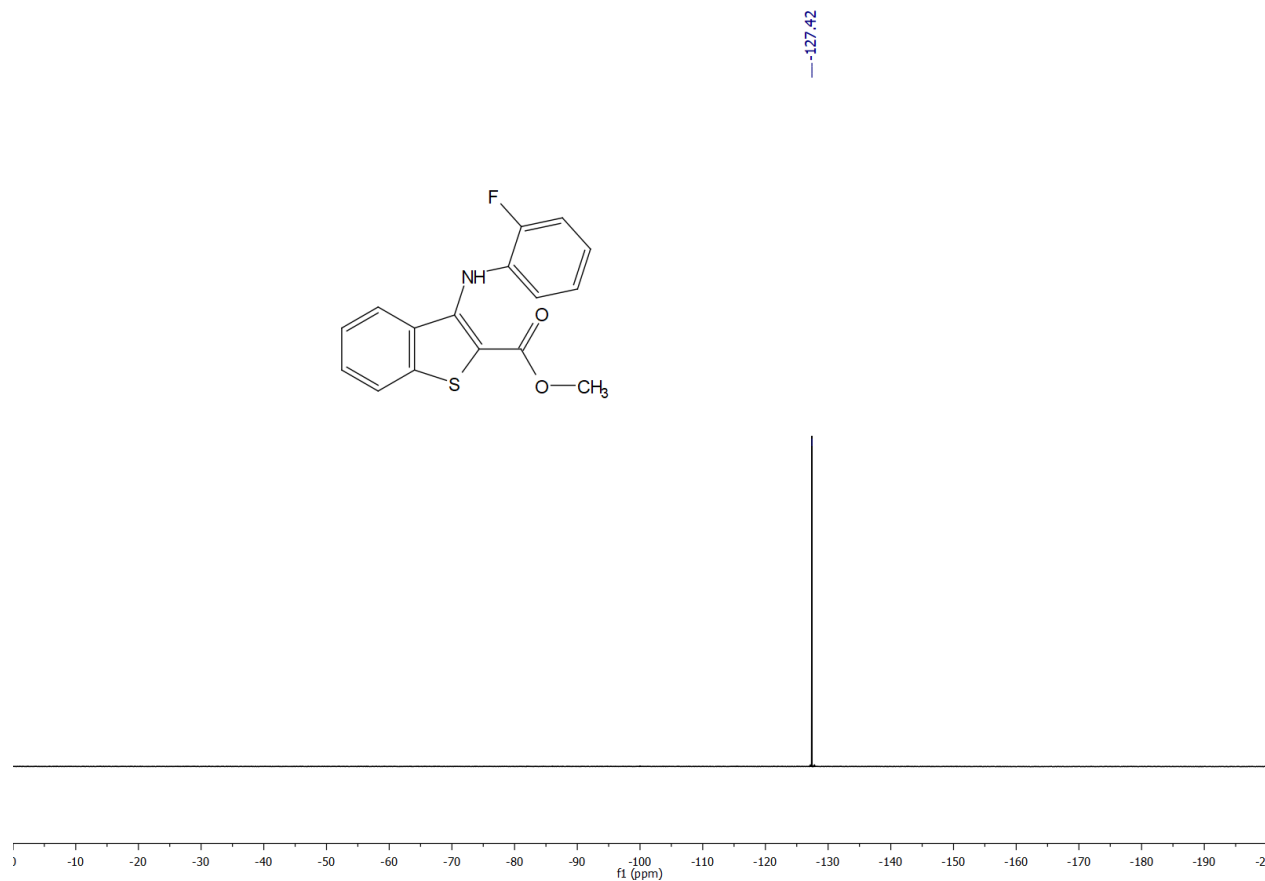

**Figure S14.** Methyl 3-[(2-fluorophenyl)amino]-1-benzothiophene-2-carboxylate (3d). <sup>19</sup>F NMR spectrum (400 MHz, CDCl<sub>3</sub>).

**Acquisition Parameter**

|             |          |                       |            |                  |           |
|-------------|----------|-----------------------|------------|------------------|-----------|
| Source Type | ESI      | Ion Polarity          | Positive   | Set Nebulizer    | 0.6 Bar   |
| Focus       | Active   | Set Capillary         | 4500 V     | Set Dry Heater   | 200 °C    |
| Scan Begin  | 50 m/z   | Set End Plate Offset  | -500 V     | Set Dry Gas      | 7.0 l/min |
| Scan End    | 1850 m/z | Set Collision Cell RF | 2500.0 Vpp | Set Divert Valve | Waste     |

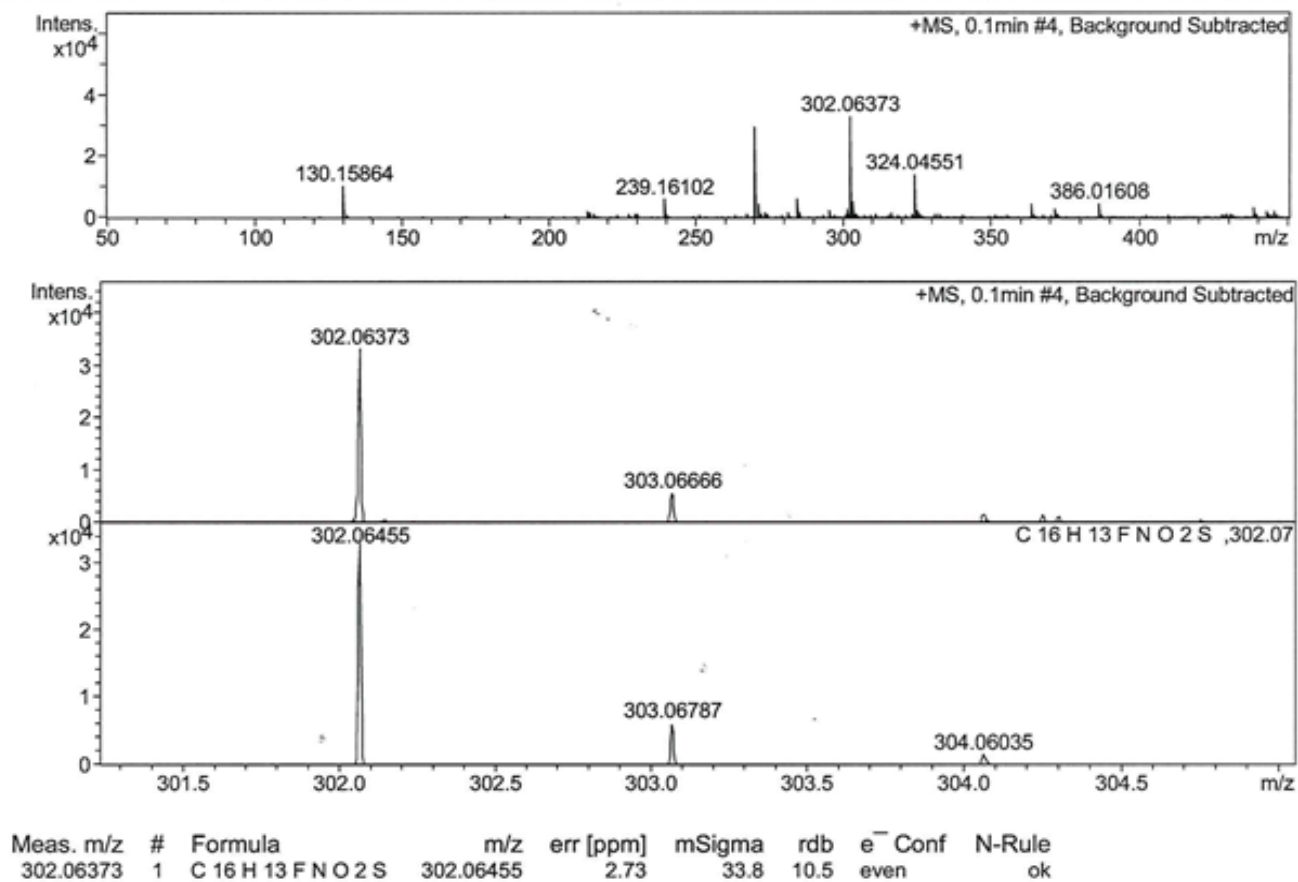

**Figure S15. Methyl 3-[(2-fluorophenyl)amino]-1-benzothiophene-2-carboxylate (3d). HRMS (ESI).**

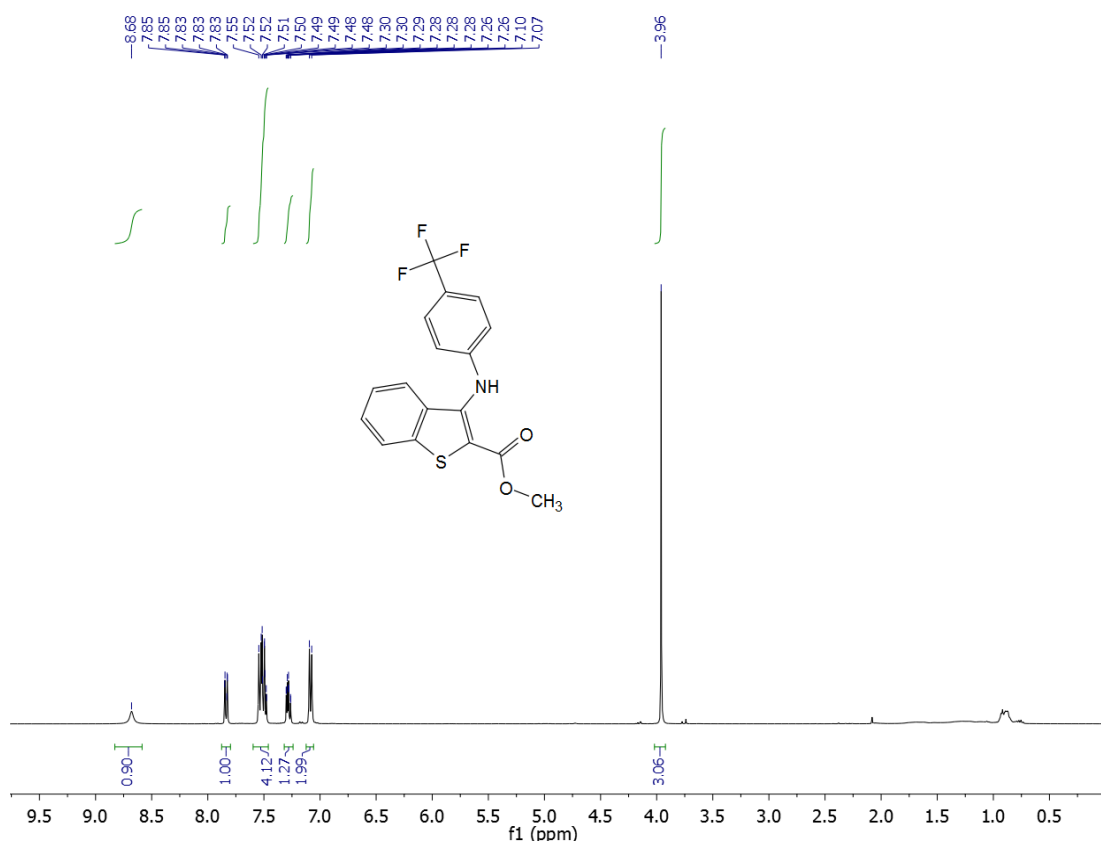

**Figure S16. Methyl 3-{[4-(trifluoromethyl)phenyl]amino}-1-benzothiophene-2-carboxylate (3e). <sup>1</sup>H NMR spectrum (400 MHz, CDCl<sub>3</sub>).**

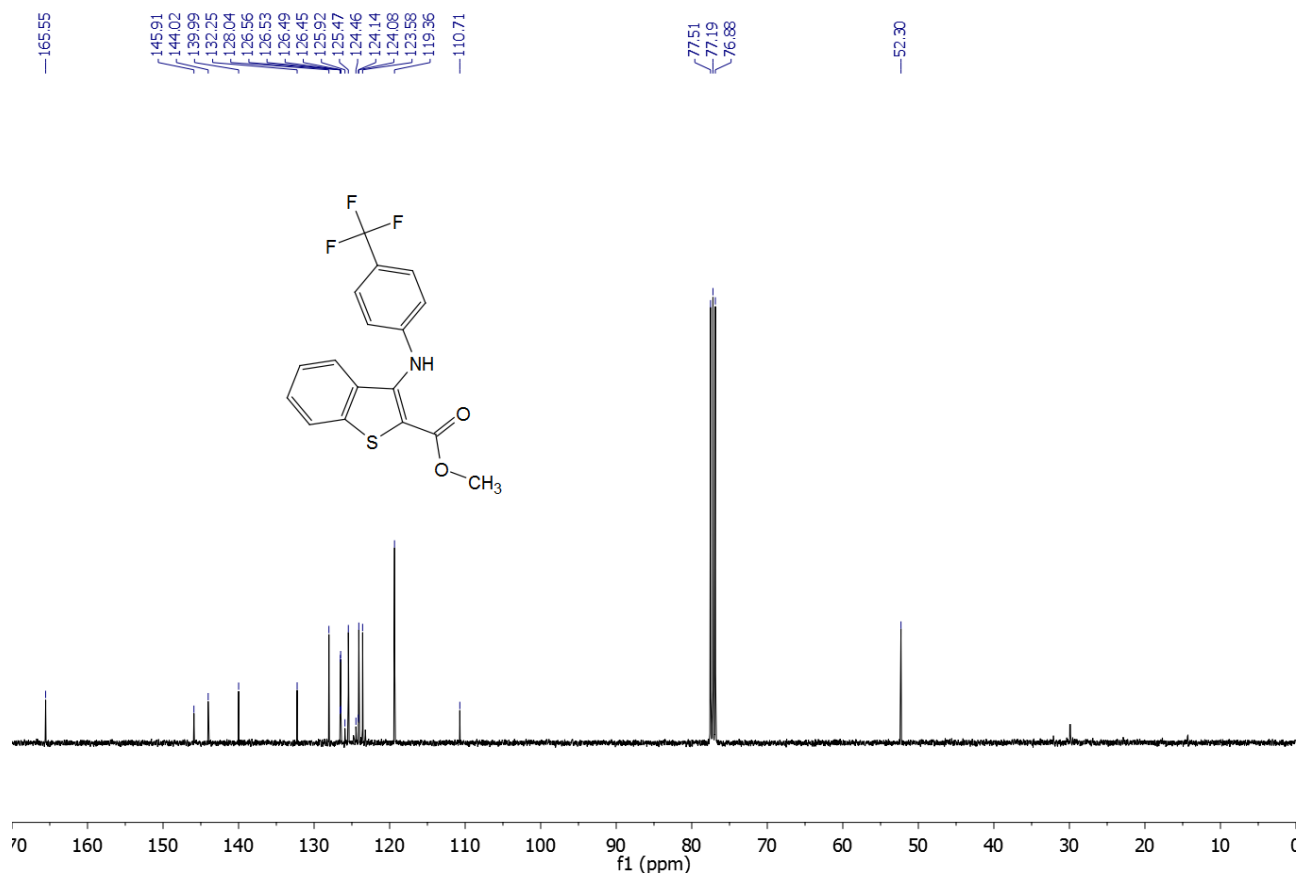

**Figure S17. Methyl 3-{[4-(trifluoromethyl)phenyl]amino}-1-benzothiophene-2-carboxylate (3e). <sup>13</sup>C NMR spectrum (100 MHz, CDCl<sub>3</sub>).**

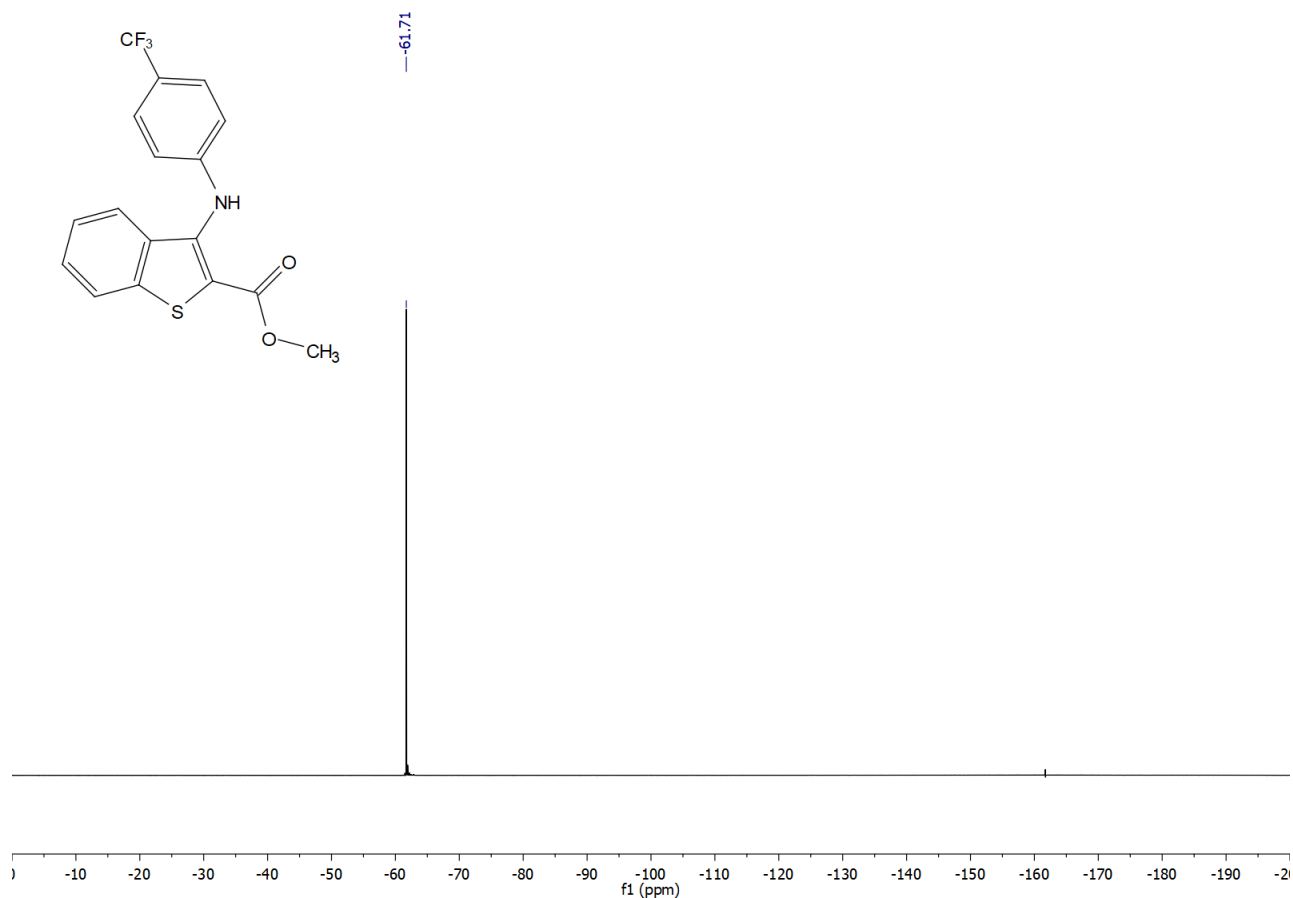

**Figure S18.** Methyl 3-{[4-(trifluoromethyl)phenyl]amino}-1-benzothiophene-2-carboxylate (3e).  $^{19}\text{F}$  NMR spectrum (100 MHz,  $\text{CDCl}_3$ ).

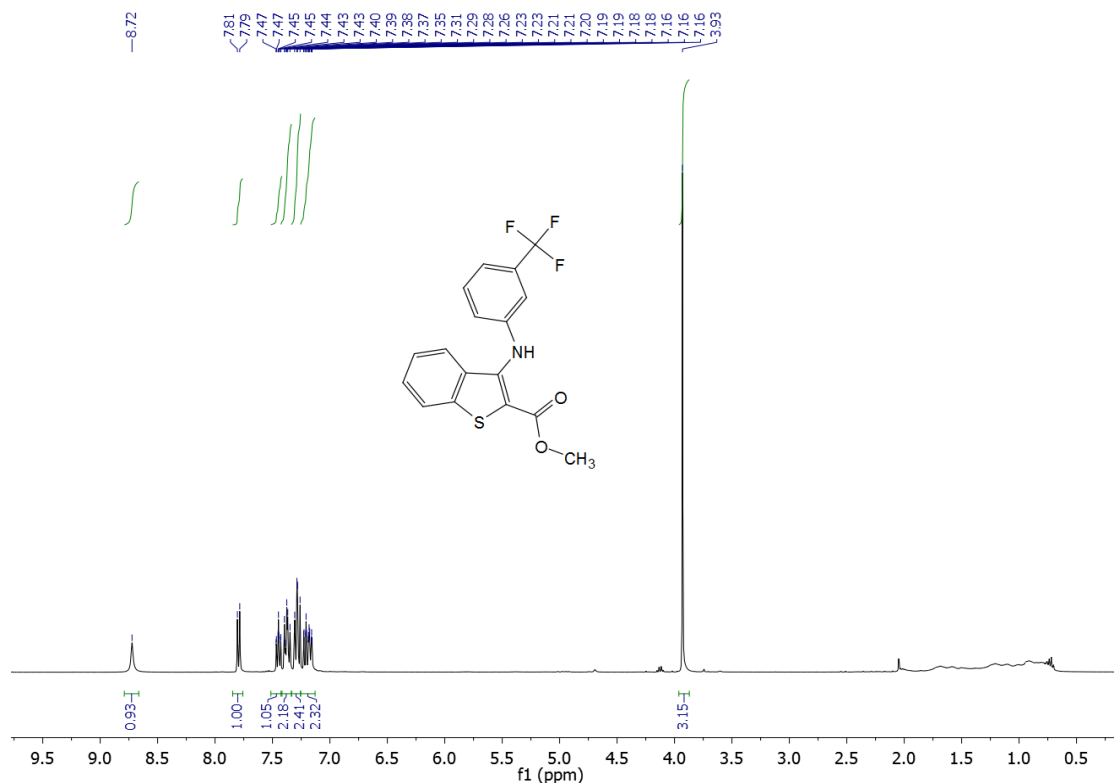

**Figure S19.** Methyl 3-{[3-(trifluoromethyl)phenyl]amino}-1-benzothiophene-2-carboxylate (3f).  $^1\text{H}$  NMR spectrum (400 MHz,  $\text{CDCl}_3$ ).

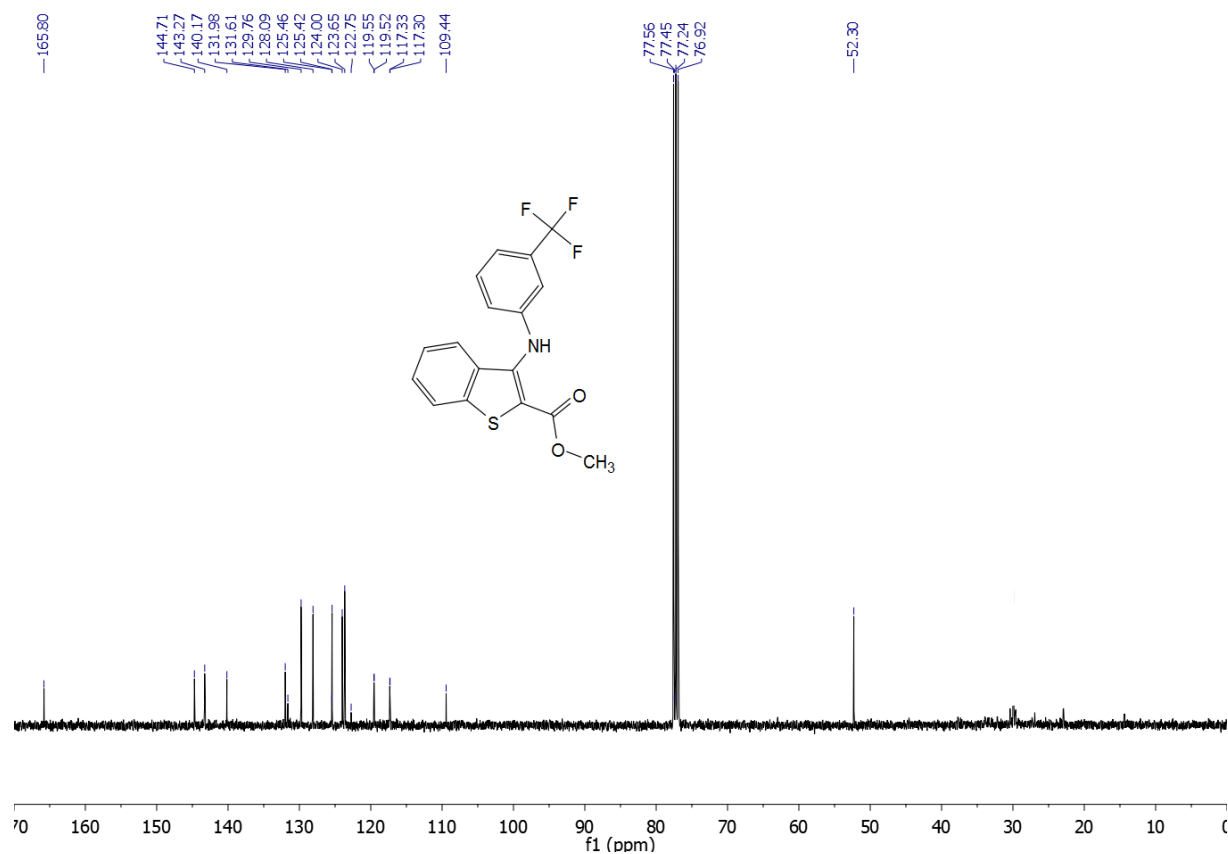

**Figure S20. Methyl 3-{[3-(trifluoromethyl)phenyl]amino}-1-benzothiophene-2-carboxylate (3f). <sup>13</sup>C NMR spectrum (100 MHz, CDCl<sub>3</sub>).**

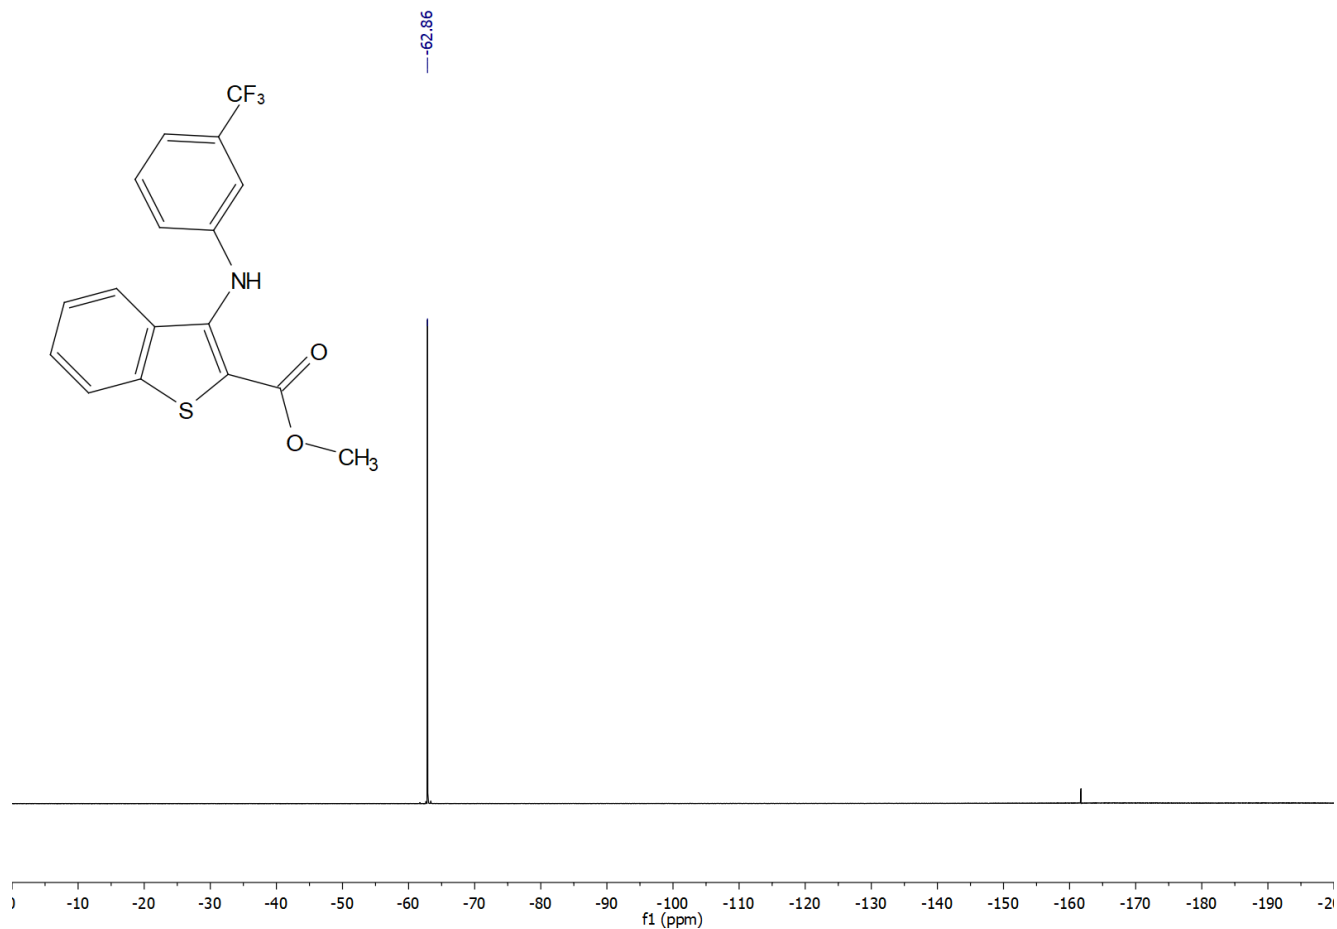

**Figure S21. Methyl 3-{[3-(trifluoromethyl)phenyl]amino}-1-benzothiophene-2-carboxylate (3f). <sup>19</sup>F NMR spectrum (100 MHz, CDCl<sub>3</sub>).**

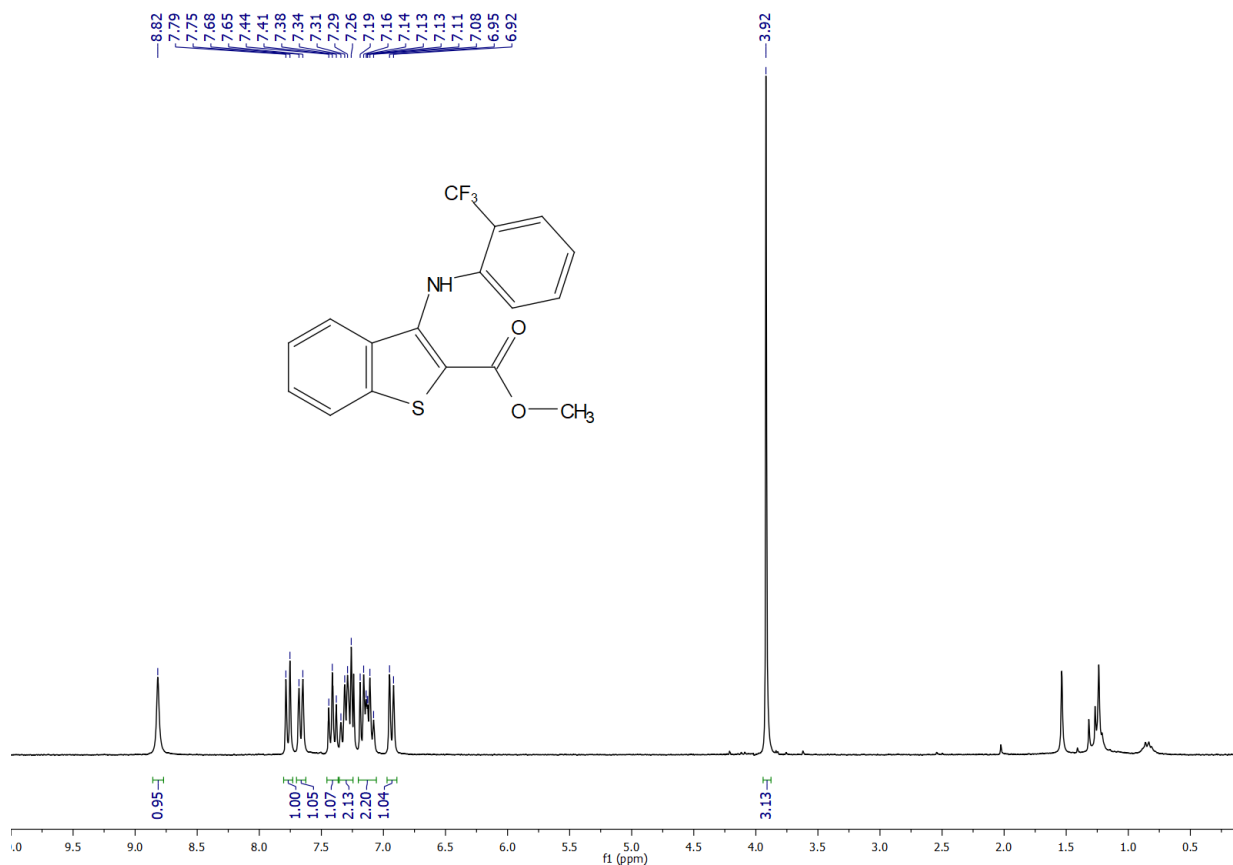

Figure S22. Methyl 3-{[2-(trifluoromethyl)phenyl]amino}-1-benzothiophene-2-carboxylate (3g). <sup>1</sup>H NMR spectrum (400 MHz, CDCl<sub>3</sub>).

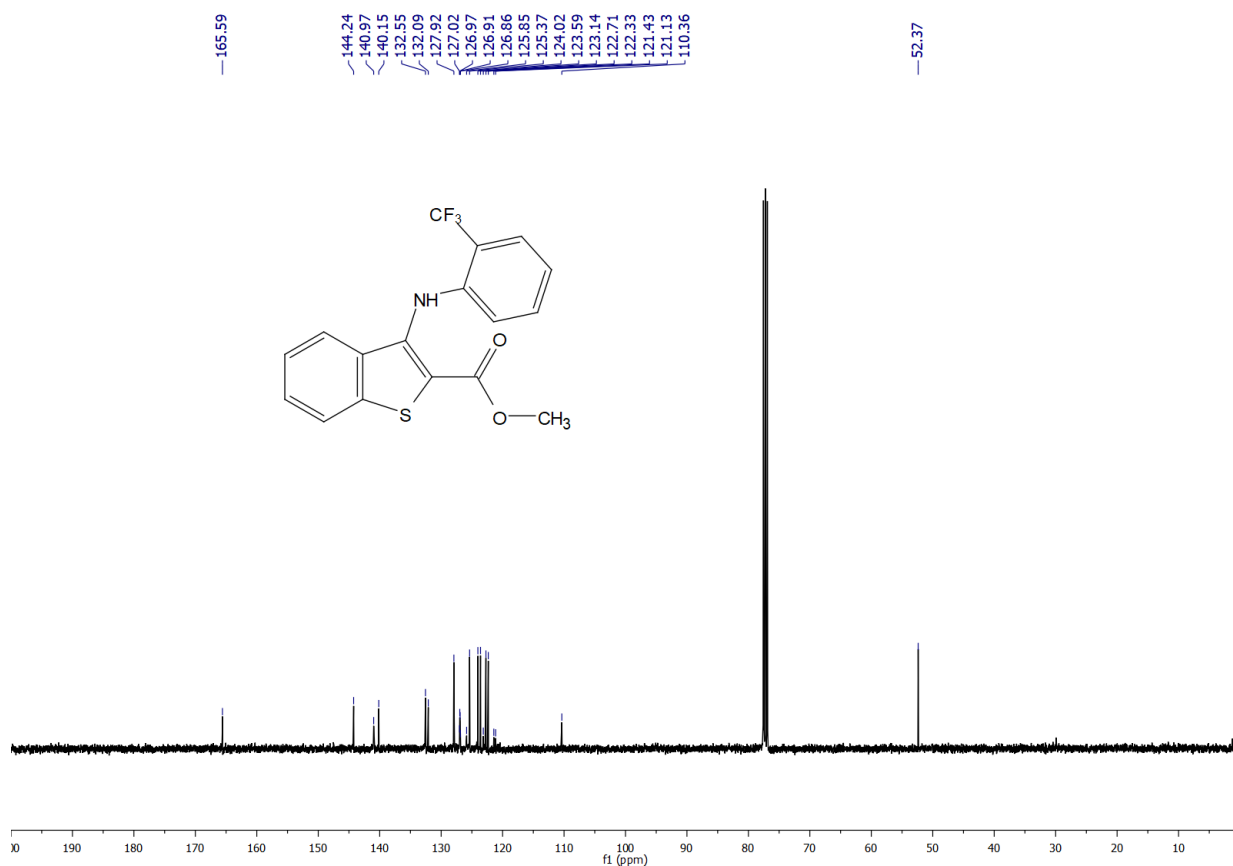

Figure S23. Methyl 3-{[2-(trifluoromethyl)phenyl]amino}-1-benzothiophene-2-carboxylate (3g). <sup>13</sup>C NMR spectrum (100 MHz, CDCl<sub>3</sub>).

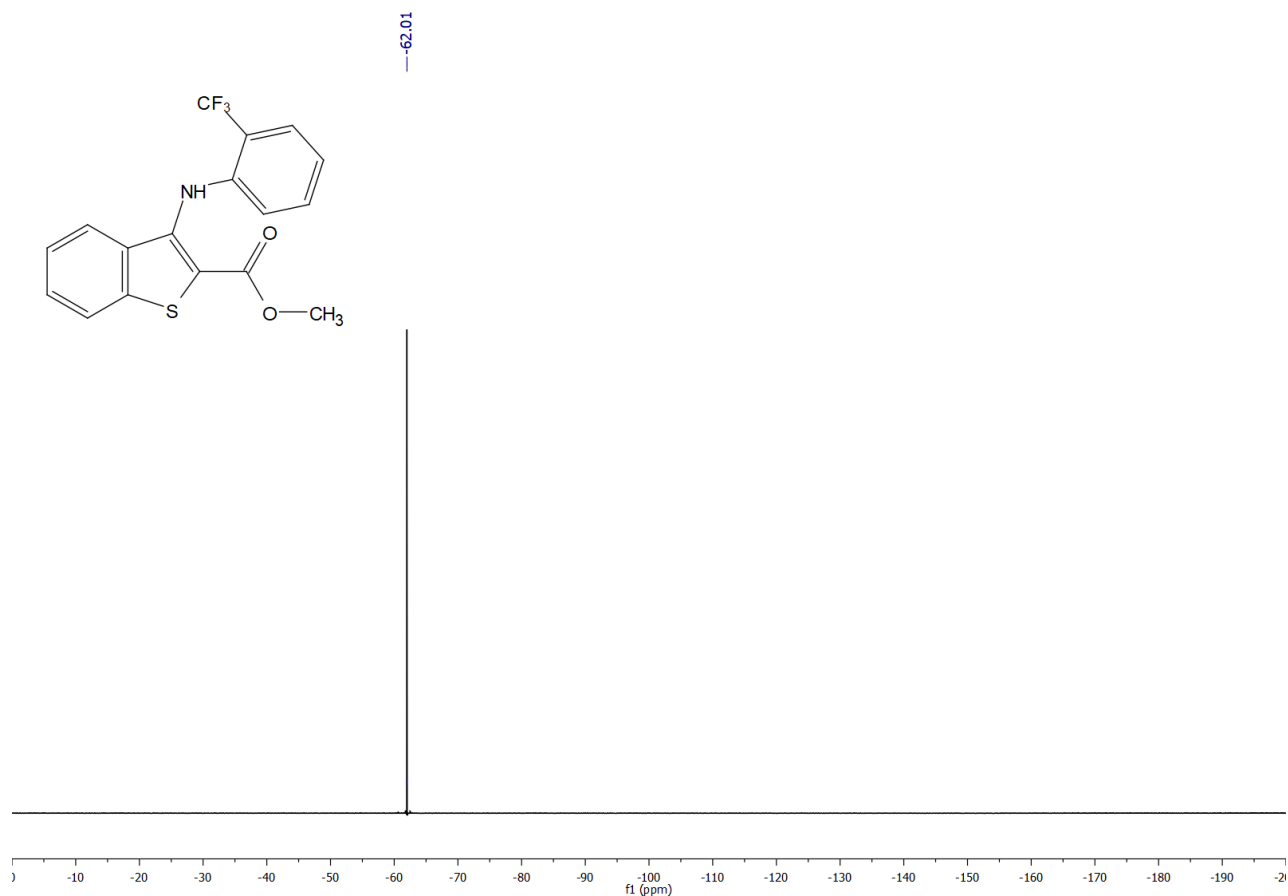

**Figure S24.** Methyl 3-([2-(trifluoromethyl)phenyl]amino)-1-benzothiophene-2-carboxylate (3g). <sup>19</sup>F NMR spectrum (100 MHz, CDCl<sub>3</sub>).

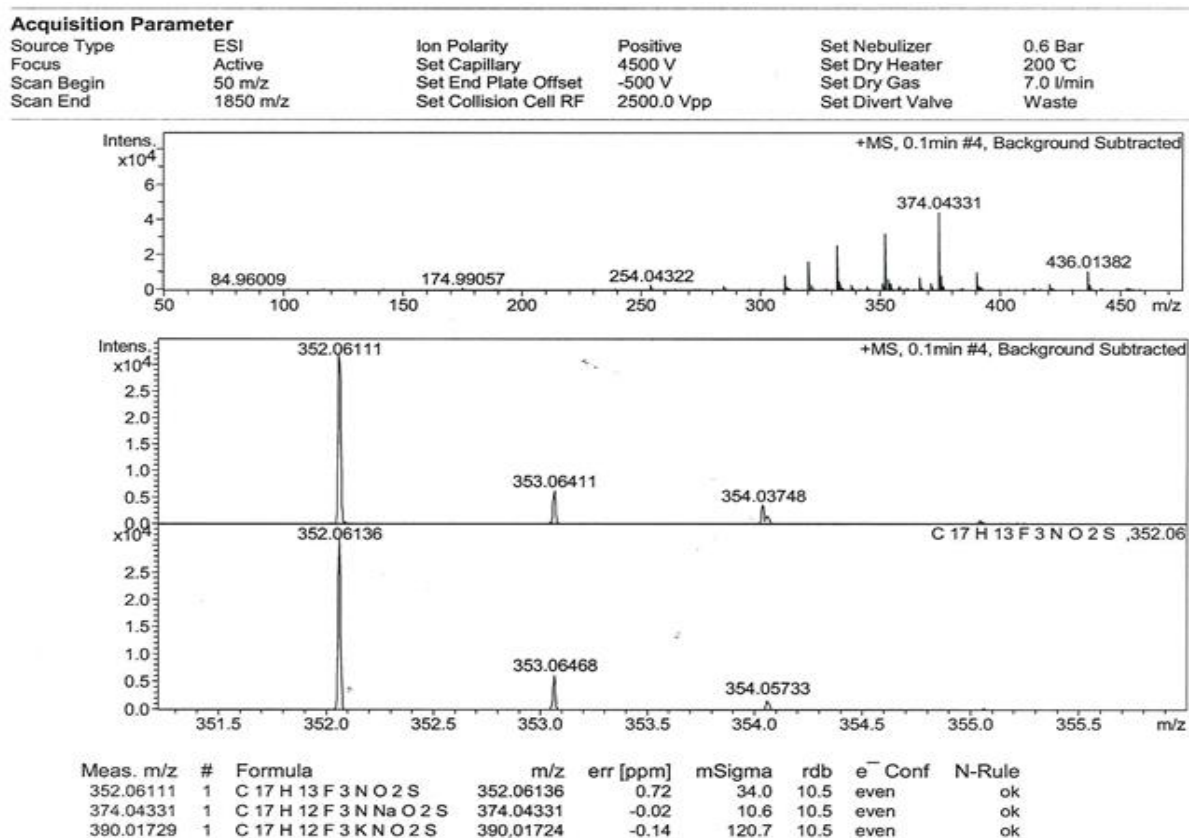

**Figure S25.** Methyl 3-([2-(trifluoromethyl)phenyl]amino)-1-benzothiophene-2-carboxylate (3g). HRMS (ESI).

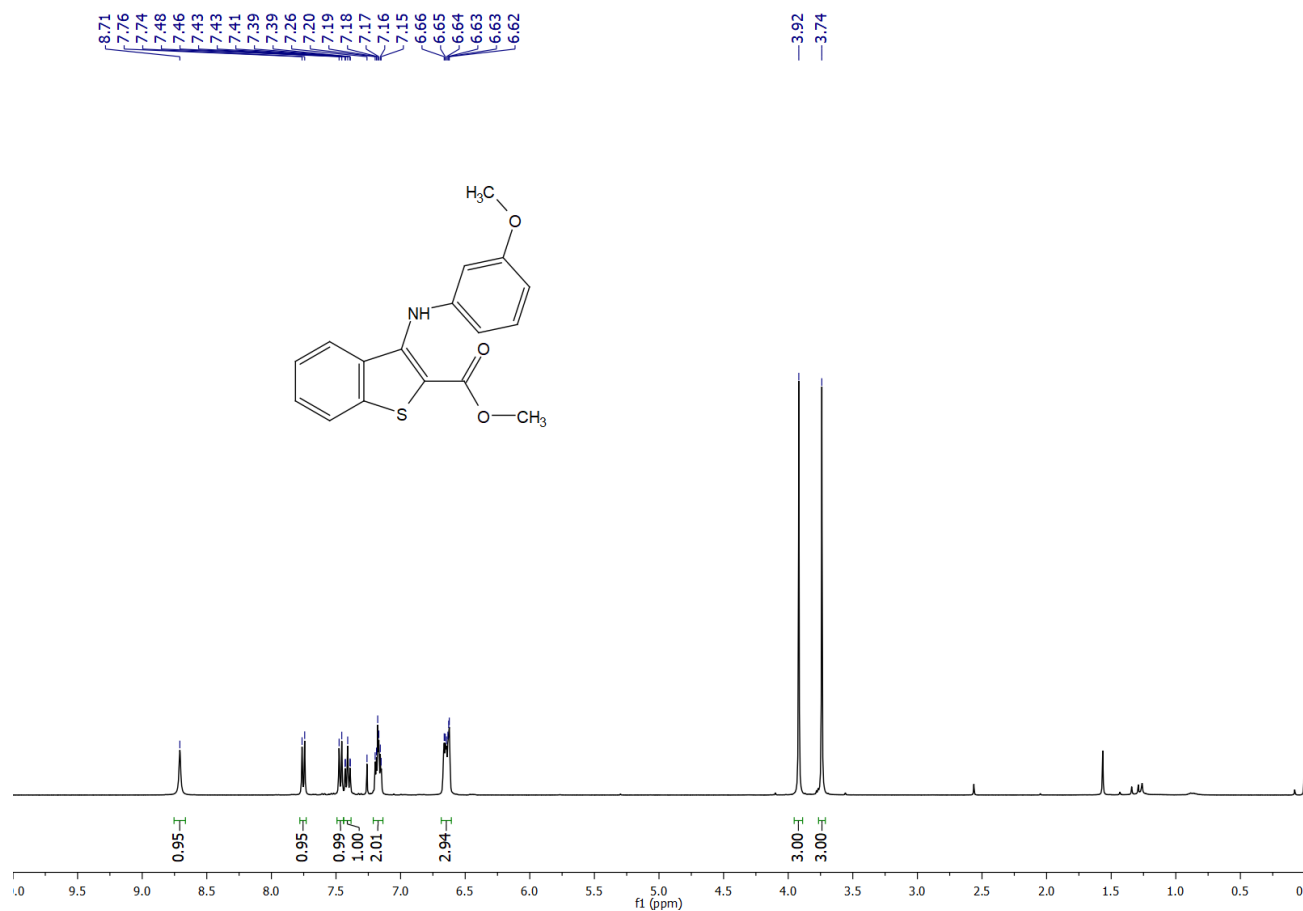

**Figure S26.** Methyl 3-[(3-methoxyphenyl)amino]-1-benzothiophene-2-carboxylate (3h). <sup>1</sup>H NMR spectrum (400 MHz, CDCl<sub>3</sub>).

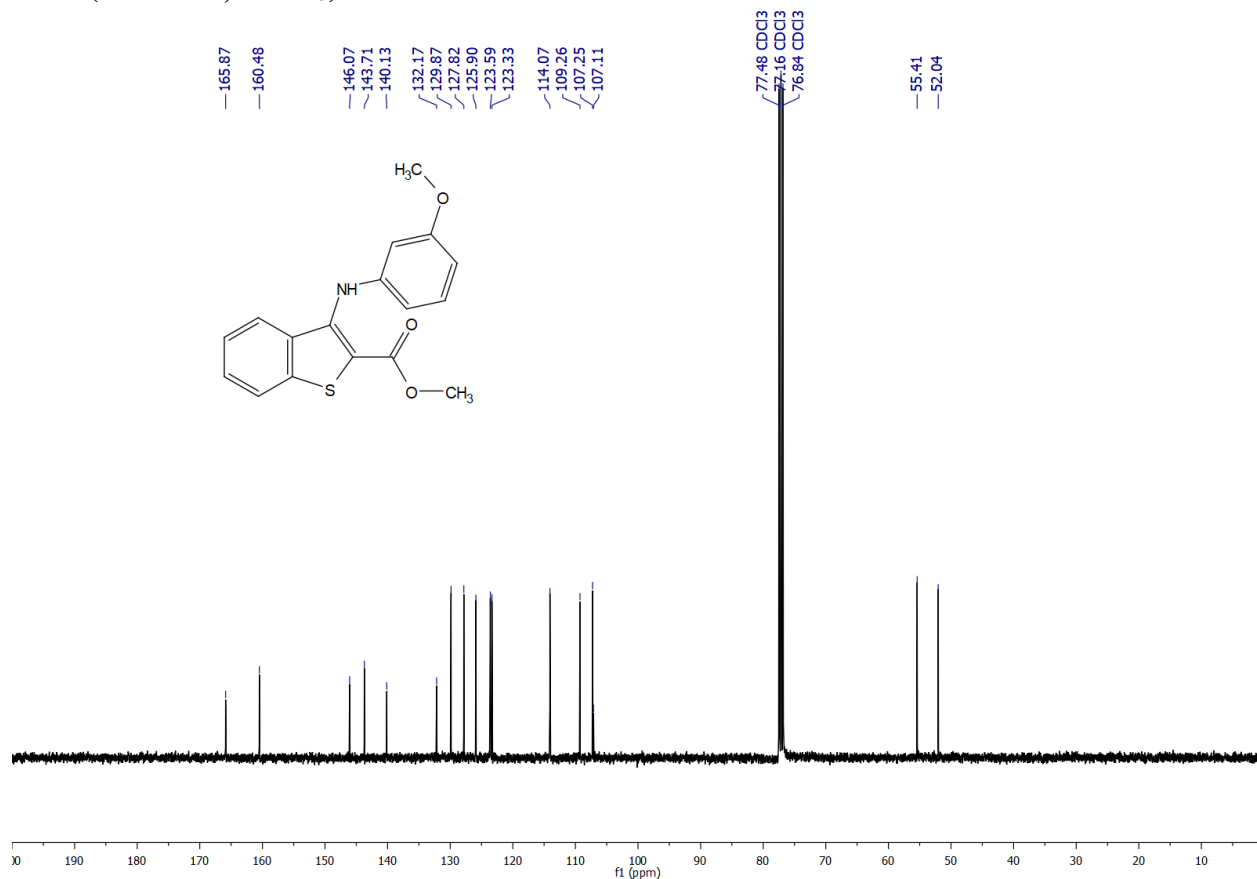

**Figure S27.** Methyl 3-[(3-methoxyphenyl)amino]-1-benzothiophene-2-carboxylate (3h). <sup>13</sup>C NMR spectrum (100 MHz, CDCl<sub>3</sub>).



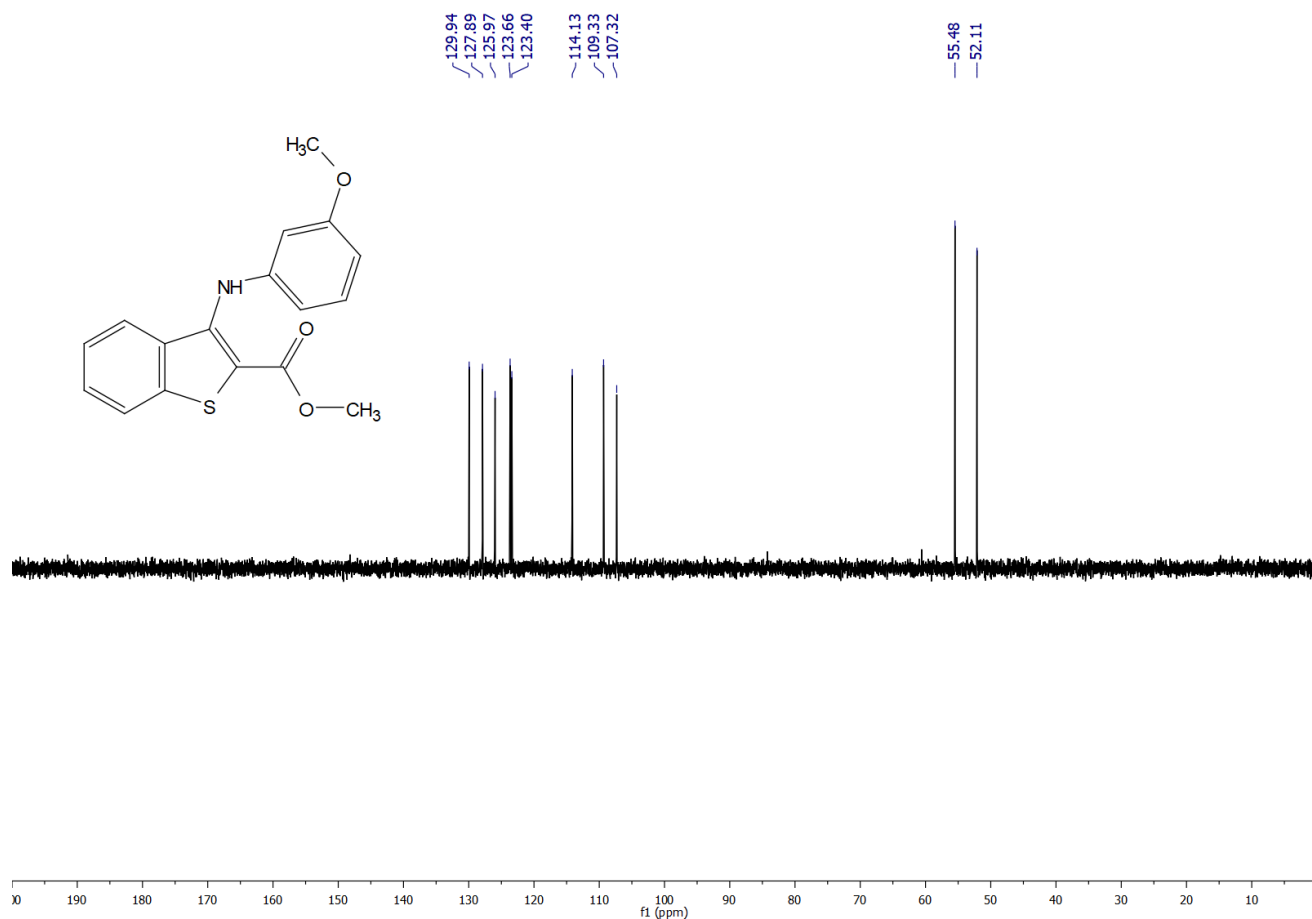

**Figure S28. Methyl 3-[(3-methoxyphenyl)amino]-1-benzothiophene-2-carboxylate (3h). DEPT135 spectrum (100 MHz, CDCl<sub>3</sub>).**

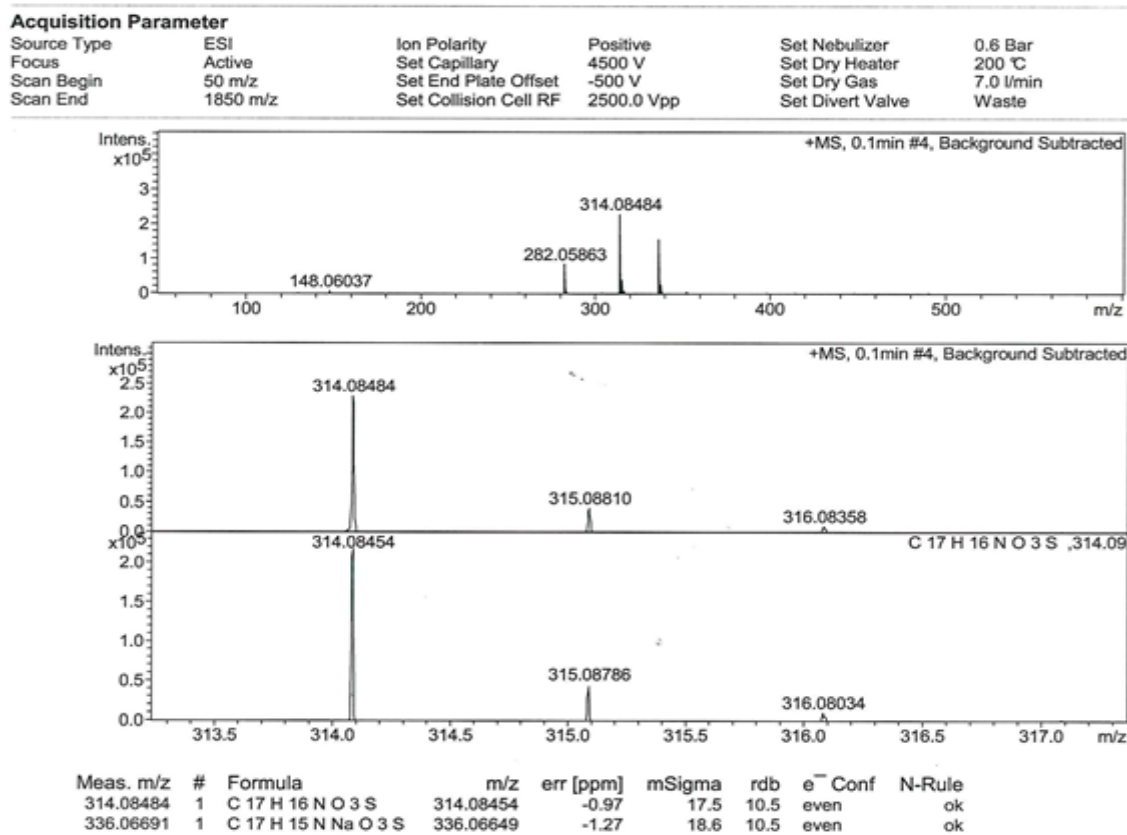

**Figure S29. Methyl 3-[(3-methoxyphenyl)amino]-1-benzothiophene-2-carboxylate (3h). HRMS (ESI).**

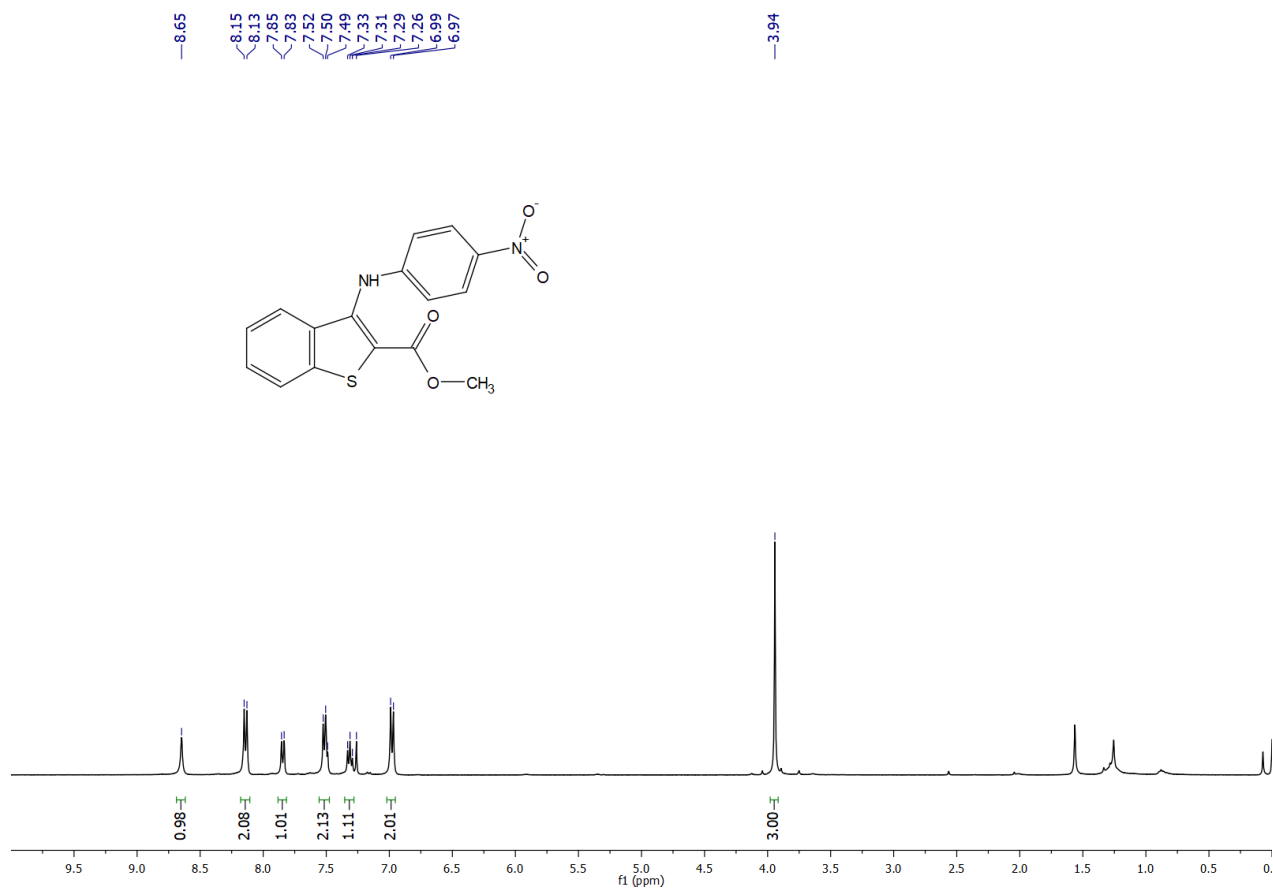

**Figure S30. Methyl 3-[(4-nitrophenyl)amino]-1-benzothiophene-2-carboxylate (3i). <sup>1</sup>H NMR spectrum (400 MHz, CDCl<sub>3</sub>).**

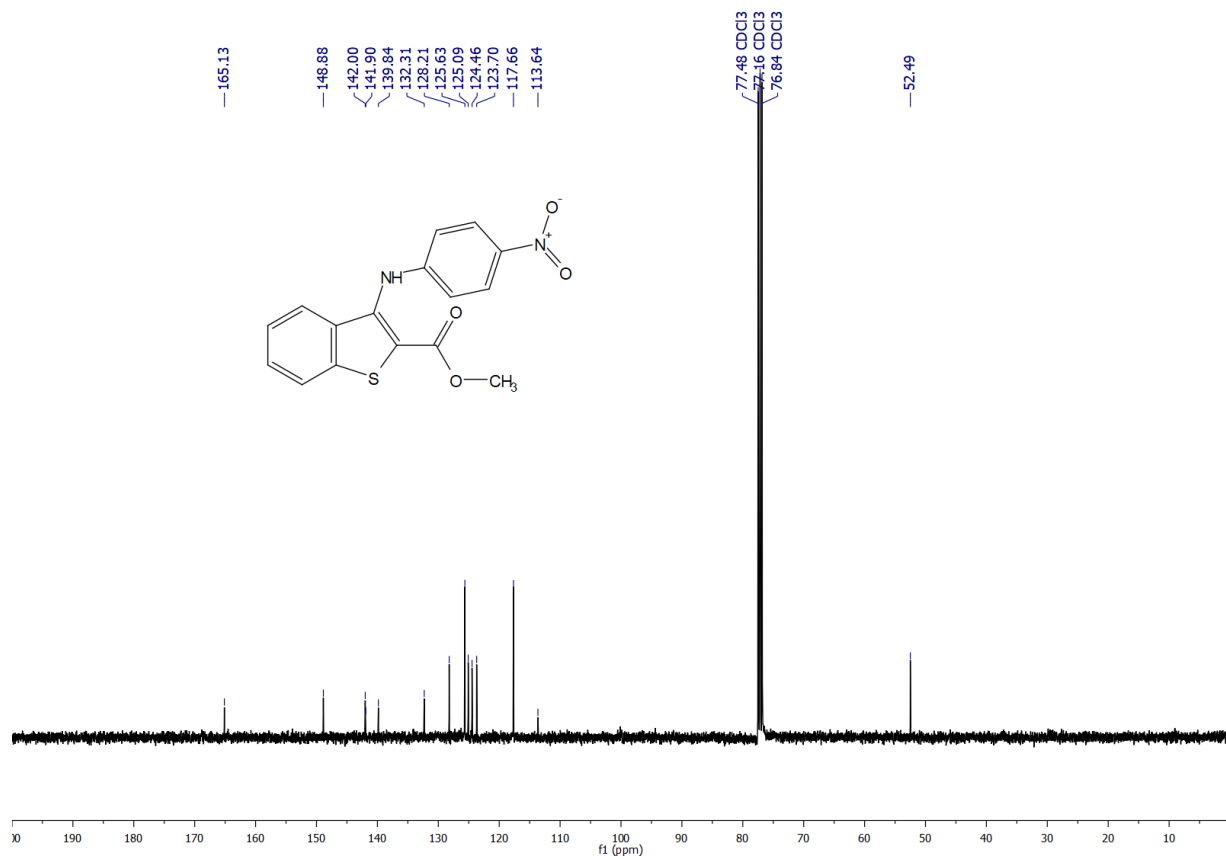

**Figure S31. Methyl 3-[(4-nitrophenyl)amino]-1-benzothiophene-2-carboxylate (3i). <sup>13</sup>C NMR spectrum (100 MHz, CDCl<sub>3</sub>).**

**Acquisition Parameter**

|             |          |                       |            |                  |           |
|-------------|----------|-----------------------|------------|------------------|-----------|
| Source Type | ESI      | Ion Polarity          | Positive   | Set Nebulizer    | 0.6 Bar   |
| Focus       | Active   | Set Capillary         | 4500 V     | Set Dry Heater   | 200 °C    |
| Scan Begin  | 50 m/z   | Set End Plate Offset  | -500 V     | Set Dry Gas      | 7.0 l/min |
| Scan End    | 1850 m/z | Set Collision Cell RF | 2500.0 Vpp | Set Divert Valve | Waste     |

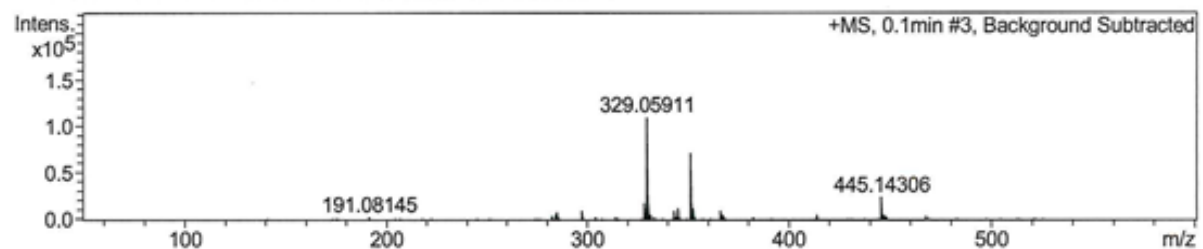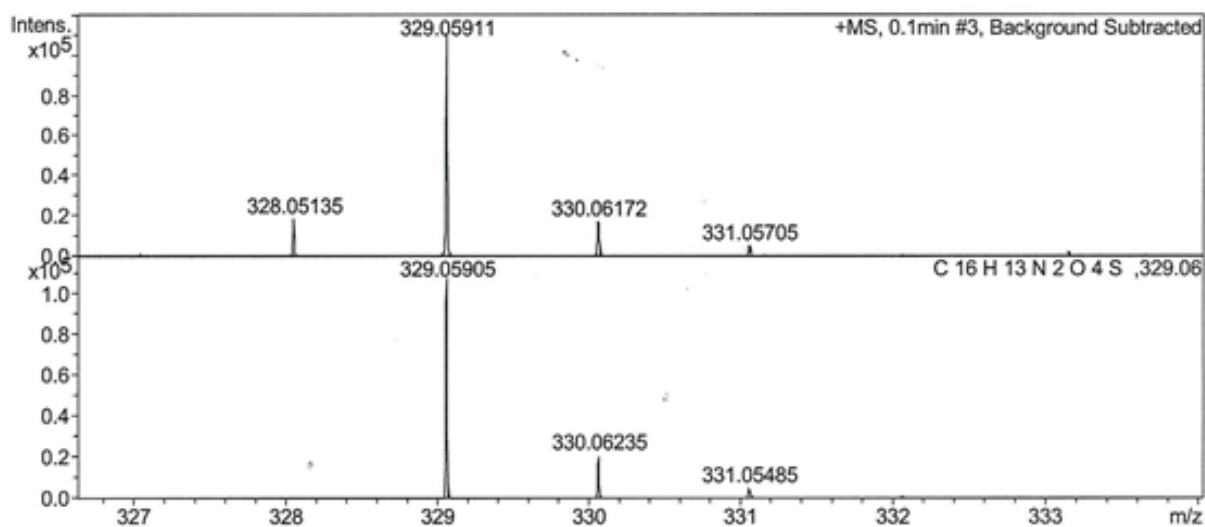

| Meas. m/z | # | Formula                | m/z       | err [ppm] | mSigma | rdb  | e <sup>-</sup> Conf | N-Rule |
|-----------|---|------------------------|-----------|-----------|--------|------|---------------------|--------|
| 329.05911 | 1 | C 16 H 13 N 2 O 4 S    | 329.05905 | -0.16     | 18.6   | 11.5 | even                | ok     |
| 351.04112 | 1 | C 16 H 12 N 2 Na O 4 S | 351.04100 | -0.35     | 7.8    | 11.5 | even                | ok     |

**Figure S32. Methyl 3-[(4-nitrophenyl)amino]-1-benzothiophene-2-carboxylate (3i). HRMS (ESI).**

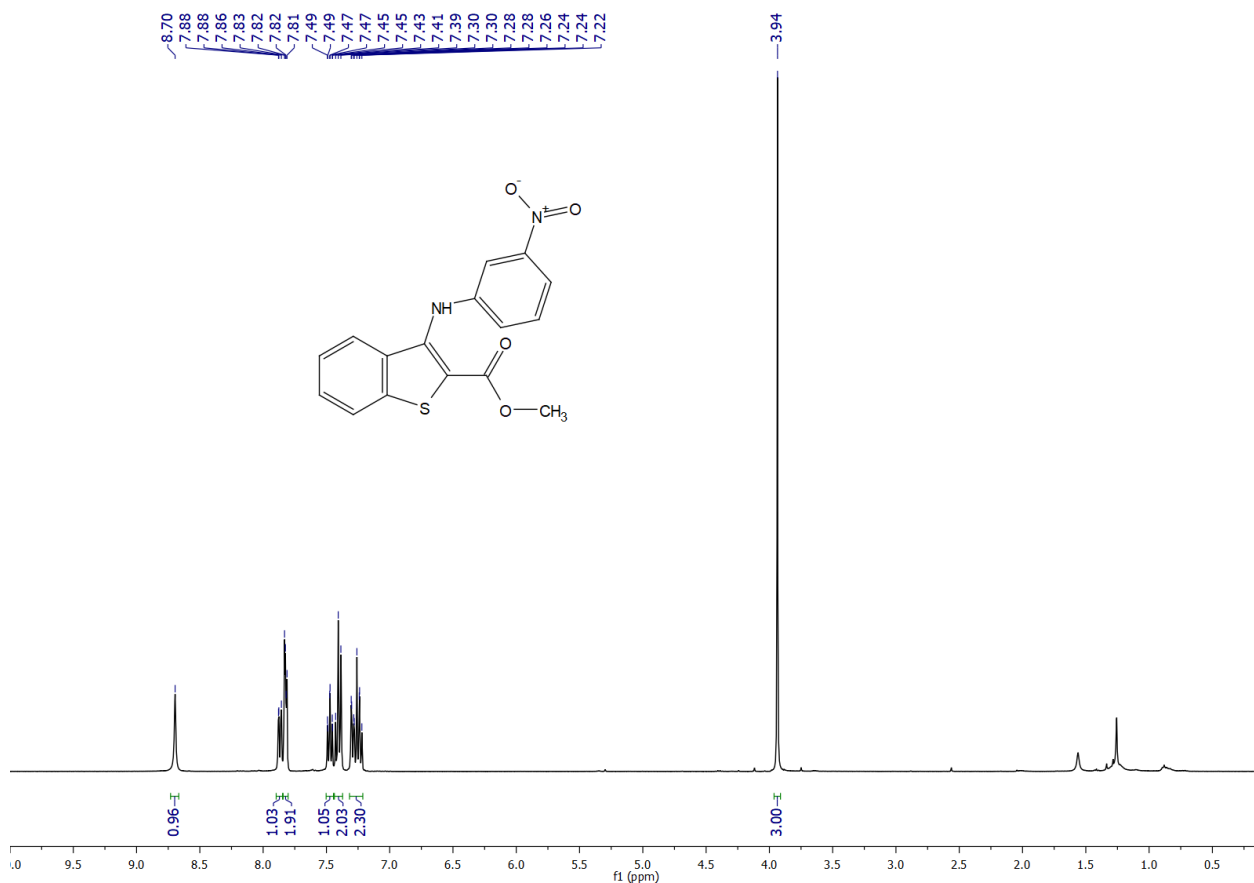

**Figure S33.** Methyl 3-[(3-nitrophenyl)amino]-1-benzothiophene-2-carboxylate (3j). <sup>1</sup>H NMR spectrum (400 MHz, CDCl<sub>3</sub>).

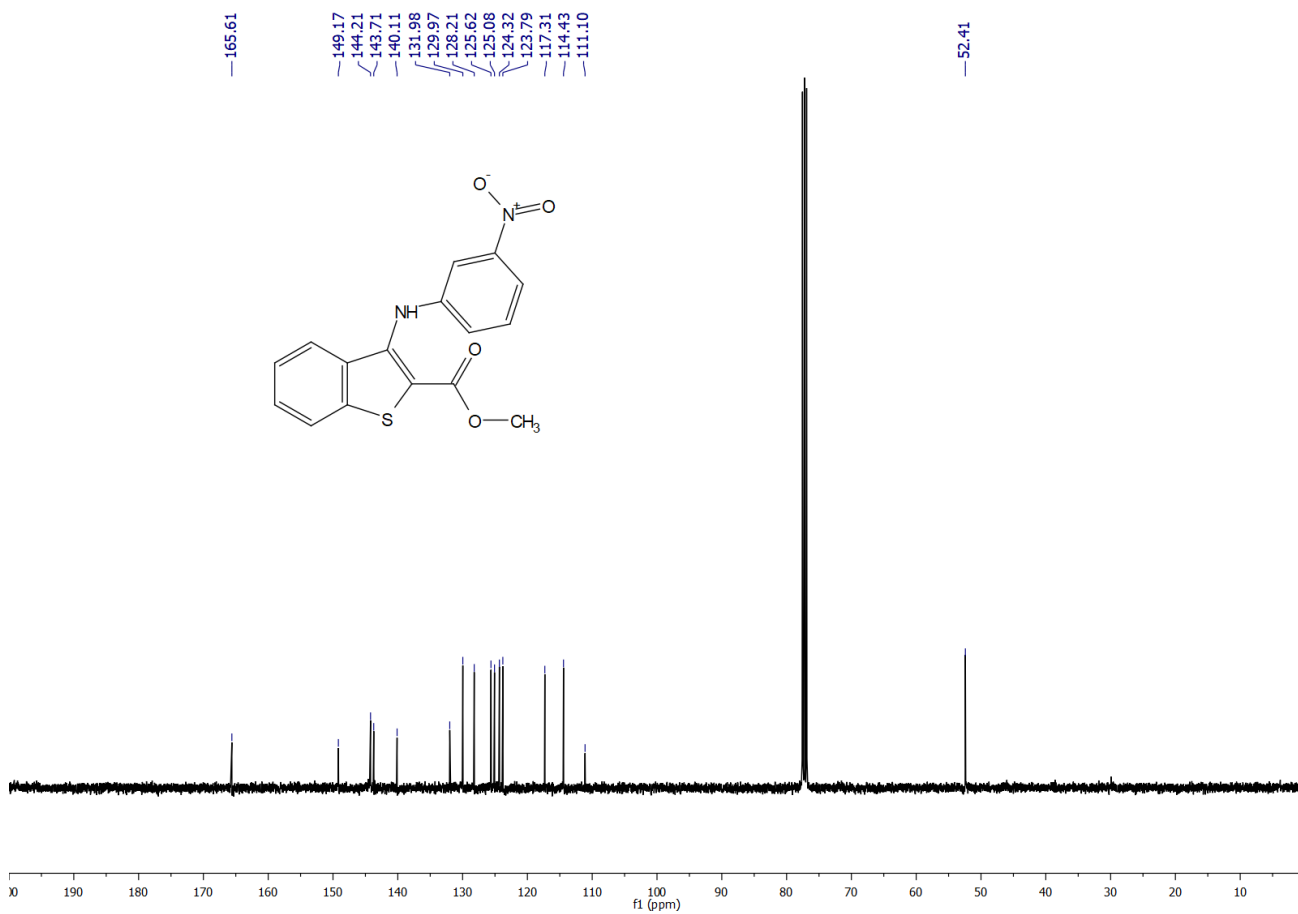

**Figure S34.** Methyl 3-[(3-nitrophenyl)amino]-1-benzothiophene-2-carboxylate (3j). <sup>13</sup>C NMR spectrum (100 MHz, CDCl<sub>3</sub>).

**Acquisition Parameter**

|             |          |                       |            |                  |           |
|-------------|----------|-----------------------|------------|------------------|-----------|
| Source Type | ESI      | Ion Polarity          | Positive   | Set Nebulizer    | 0.6 Bar   |
| Focus       | Active   | Set Capillary         | 4500 V     | Set Dry Heater   | 200 °C    |
| Scan Begin  | 50 m/z   | Set End Plate Offset  | -500 V     | Set Dry Gas      | 7.0 l/min |
| Scan End    | 1850 m/z | Set Collision Cell RF | 2500.0 Vpp | Set Divert Valve | Waste     |

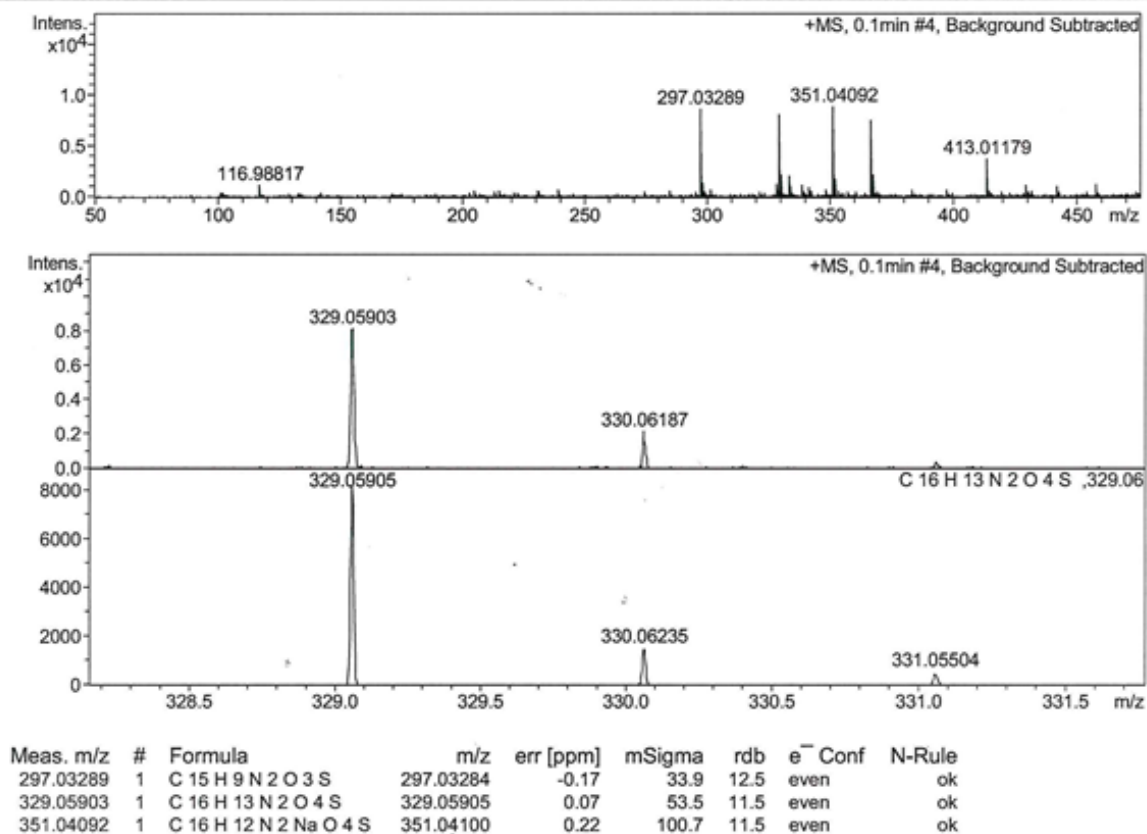

**Figure S35. Methyl 3-[(3-nitrophenyl)amino]-1-benzothiophene-2-carboxylate (3j). HRMS (ESI).**

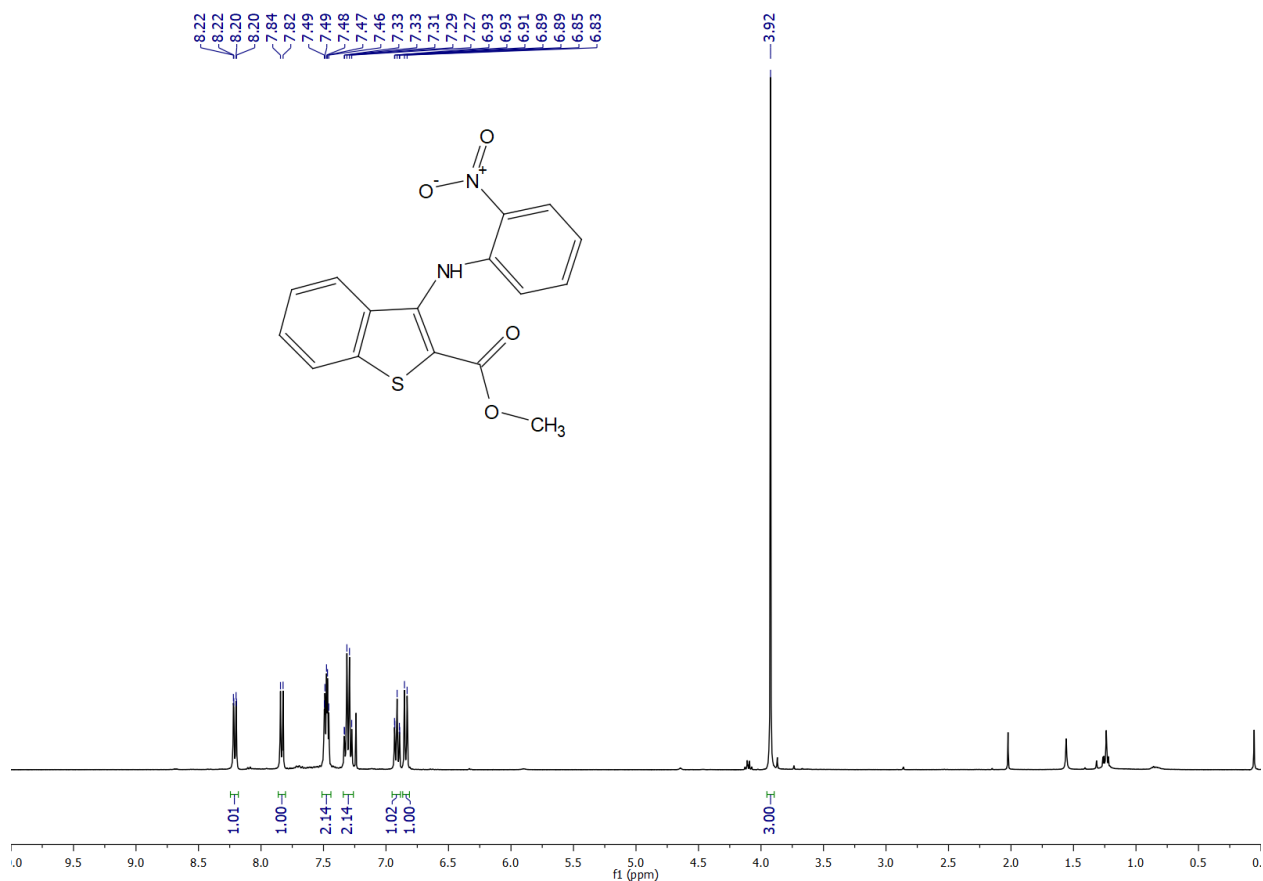

**Figure S36.** Methyl 3-[(2-nitrophenyl)amino]-1-benzothiophene-2-carboxylate (3k). <sup>1</sup>H NMR spectrum (400 MHz, CDCl<sub>3</sub>).

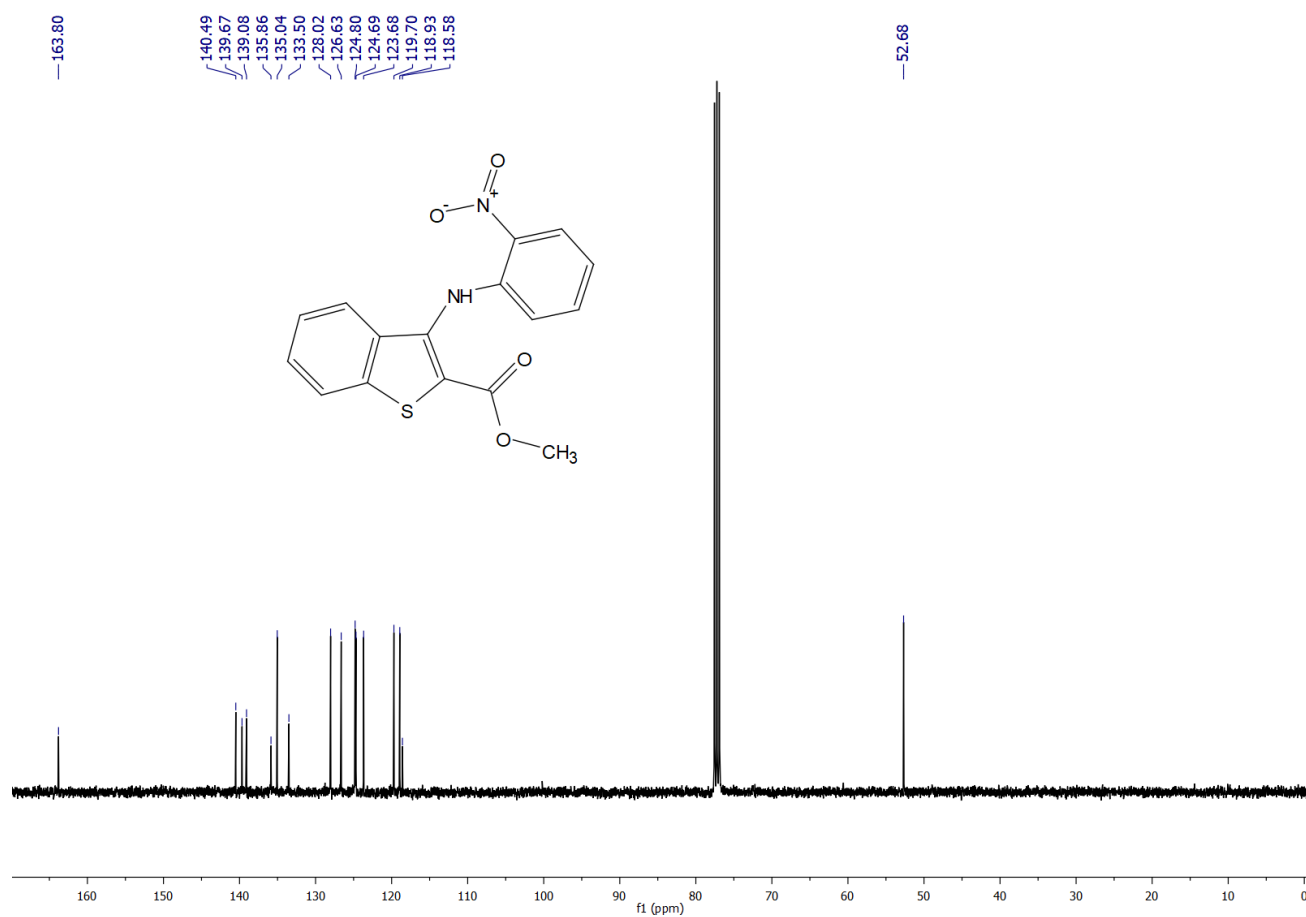

**Figure S37.** Methyl 3-[(2-nitrophenyl)amino]-1-benzothiophene-2-carboxylate (3k). <sup>13</sup>C NMR spectrum (100 MHz, CDCl<sub>3</sub>).

**Acquisition Parameter**

|             |          |                       |            |                  |           |
|-------------|----------|-----------------------|------------|------------------|-----------|
| Source Type | ESI      | Ion Polarity          | Positive   | Set Nebulizer    | 0.6 Bar   |
| Focus       | Active   | Set Capillary         | 4500 V     | Set Dry Heater   | 200 °C    |
| Scan Begin  | 50 m/z   | Set End Plate Offset  | -500 V     | Set Dry Gas      | 7.0 l/min |
| Scan End    | 1850 m/z | Set Collision Cell RF | 2500.0 Vpp | Set Divert Valve | Waste     |

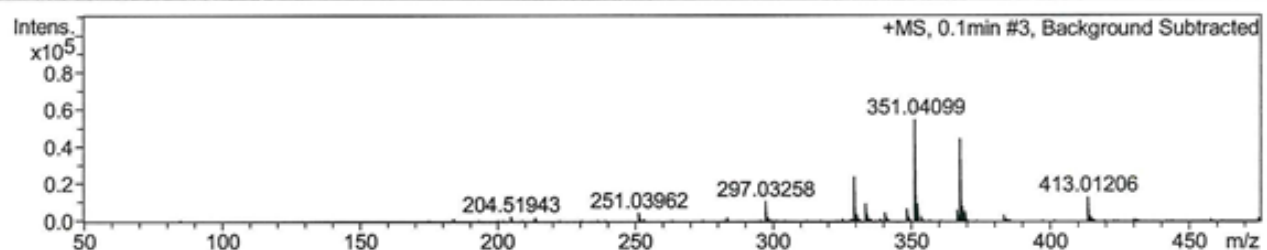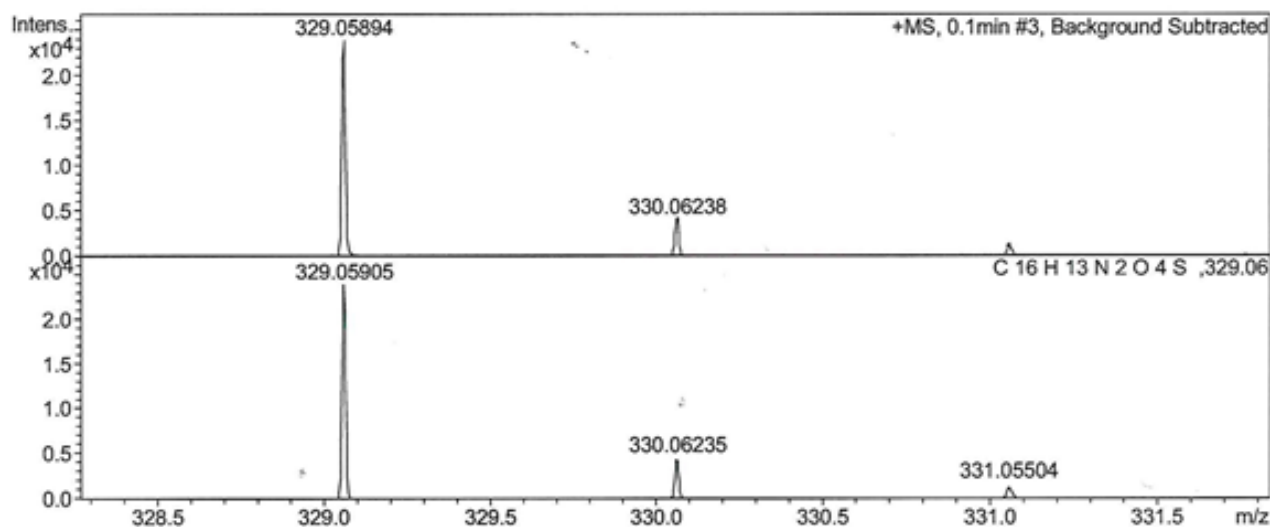

| Meas. m/z | # | Formula                                                           | m/z       | err [ppm] | mSigma | rdb  | e <sup>-</sup> Conf | N-Rule |
|-----------|---|-------------------------------------------------------------------|-----------|-----------|--------|------|---------------------|--------|
| 329.05894 | 1 | C <sub>16</sub> H <sub>13</sub> N <sub>2</sub> O <sub>4</sub> S   | 329.05905 | 0.36      | 36.6   | 11.5 | even                | ok     |
| 351.04099 | 1 | C <sub>16</sub> H <sub>12</sub> N <sub>2</sub> NaO <sub>4</sub> S | 351.04100 | 0.03      | 12.7   | 11.5 | even                | ok     |
| 367.01501 | 1 | C <sub>16</sub> H <sub>12</sub> KN <sub>2</sub> O <sub>4</sub> S  | 367.01494 | -0.20     | 18.9   | 11.5 | even                | ok     |

**Figure S38. Methyl 3-[(2-nitrophenyl)amino]-1-benzothiophene-2-carboxylate (3k). HRMS (ESI).**

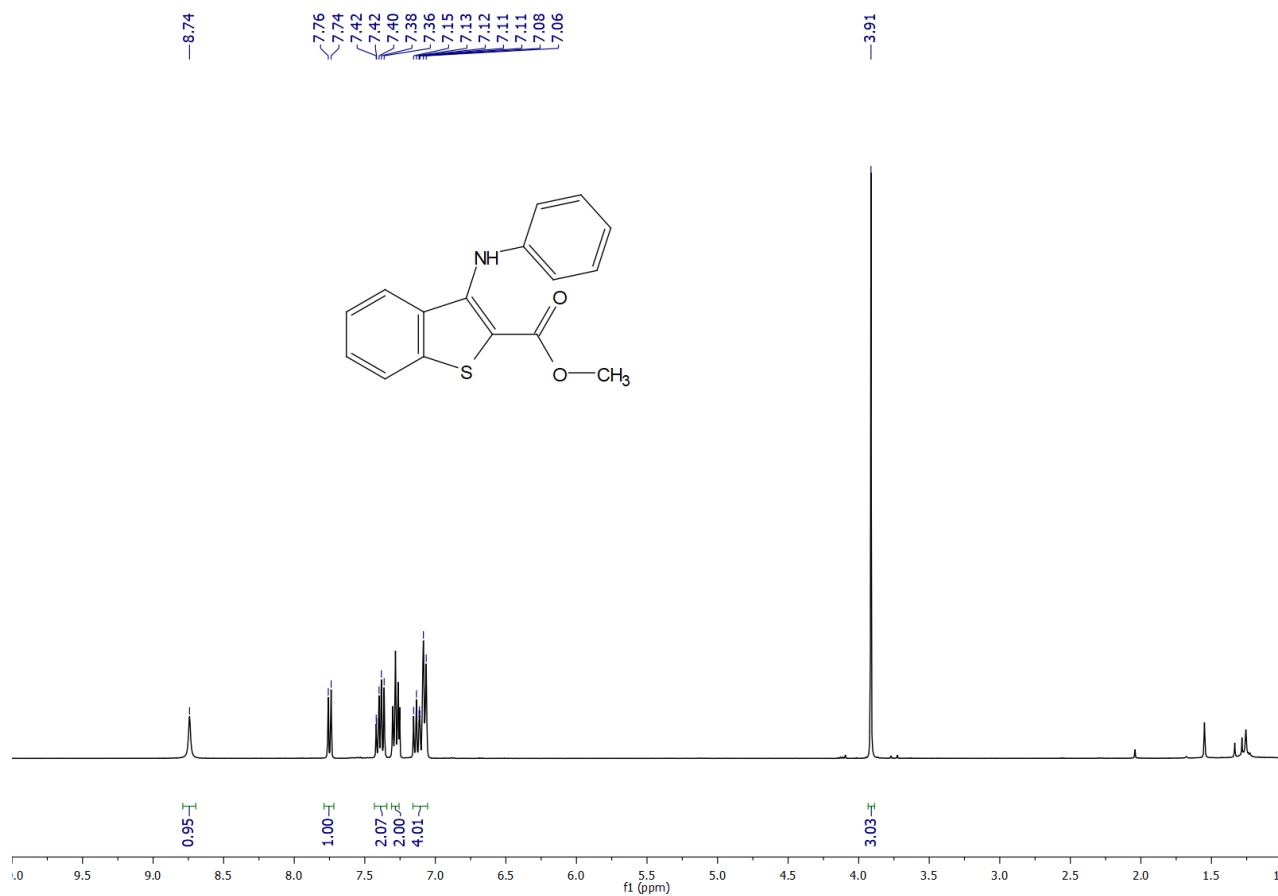

**Figure S39.** Methyl 3-(phenylamino)-1-benzothiophene-2-carboxylate (3l). <sup>1</sup>H NMR spectrum (400 MHz, CDCl<sub>3</sub>).

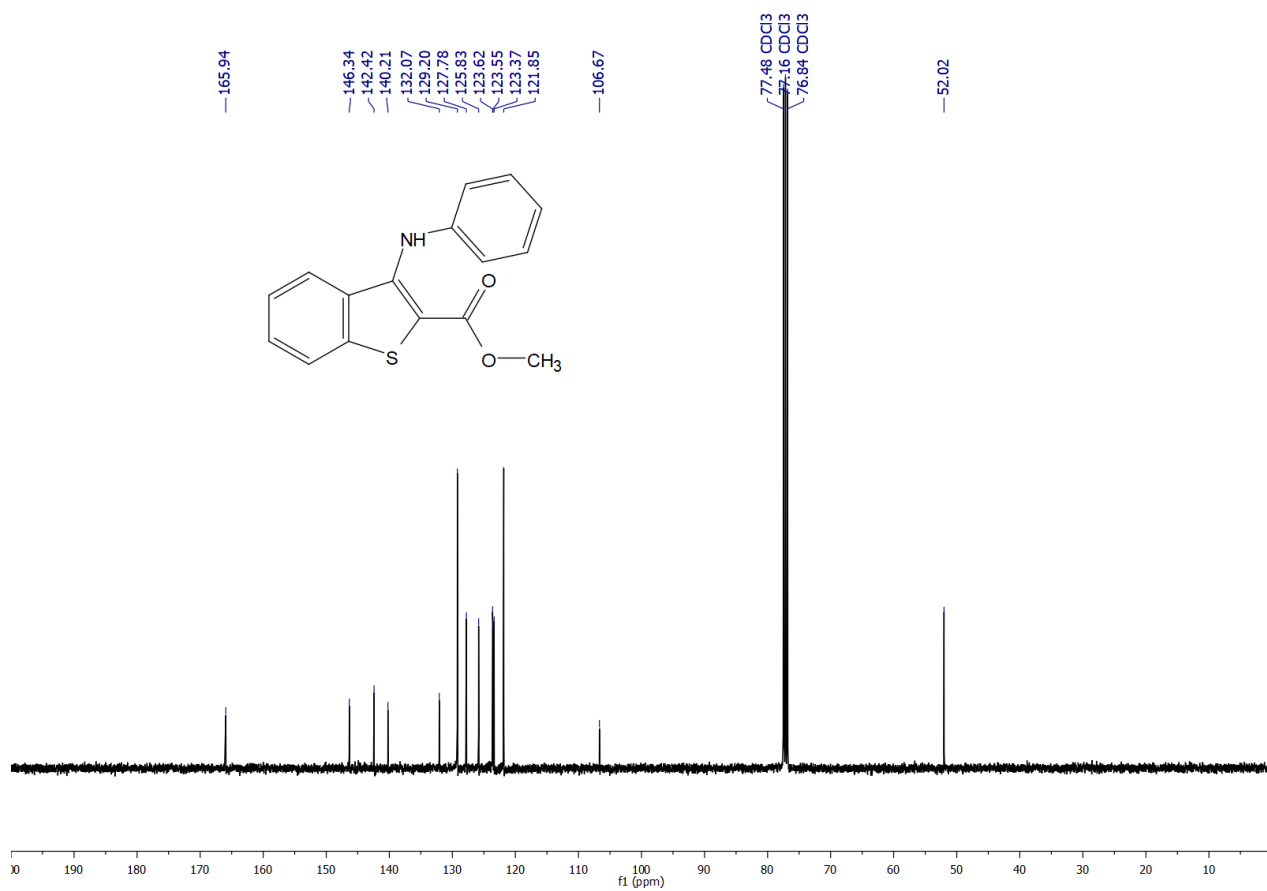

**Figure S40.** Methyl 3-(phenylamino)-1-benzothiophene-2-carboxylate (3l). <sup>13</sup>C NMR spectrum (100 MHz, CDCl<sub>3</sub>).



**Acquisition Parameter**

|             |          |                       |            |                  |           |
|-------------|----------|-----------------------|------------|------------------|-----------|
| Source Type | ESI      | Ion Polarity          | Positive   | Set Nebulizer    | 0.6 Bar   |
| Focus       | Active   | Set Capillary         | 4500 V     | Set Dry Heater   | 200 °C    |
| Scan Begin  | 50 m/z   | Set End Plate Offset  | -500 V     | Set Dry Gas      | 7.0 l/min |
| Scan End    | 1850 m/z | Set Collision Cell RF | 2500.0 Vpp | Set Divert Valve | Waste     |

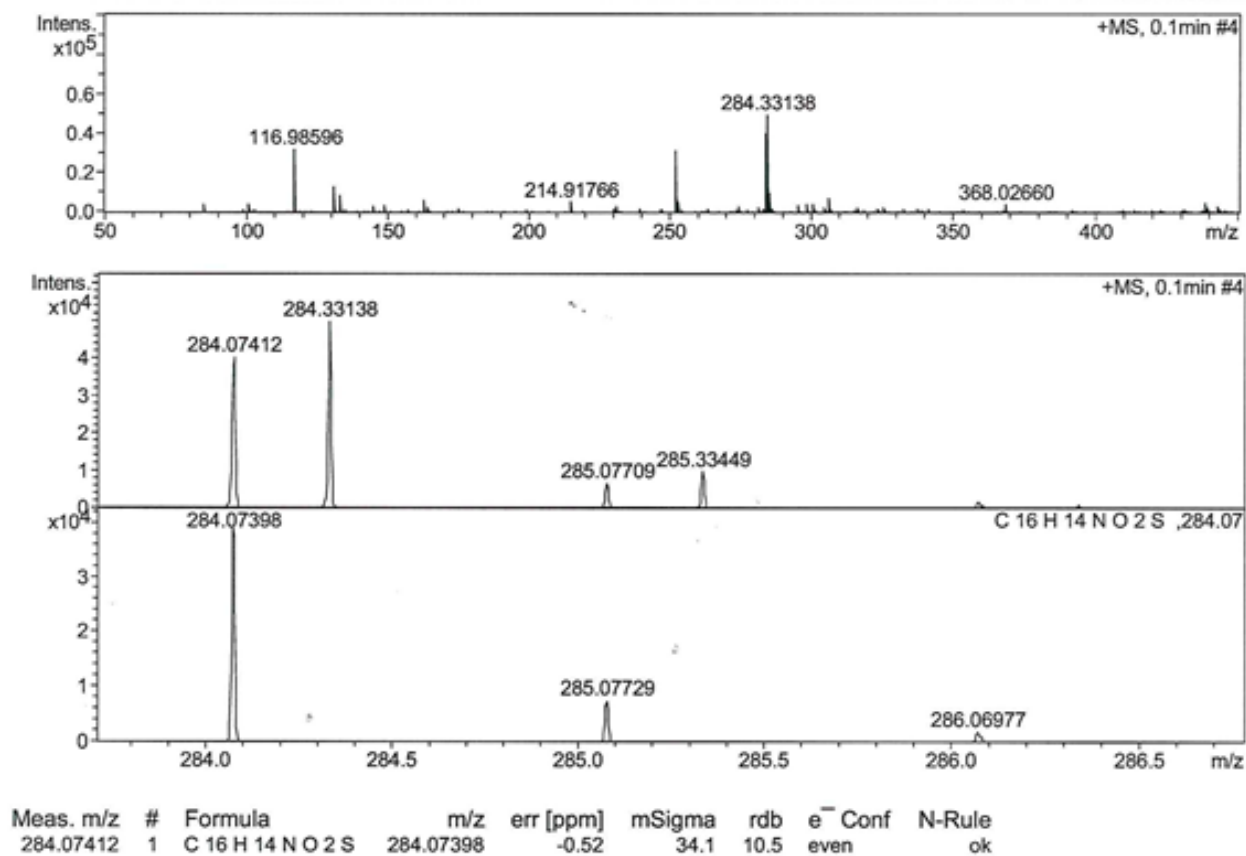

**Figure S41. Methyl 3-(phenylamino)-1-benzothiophene-2-carboxylate (3l). HRMS (ESI).**

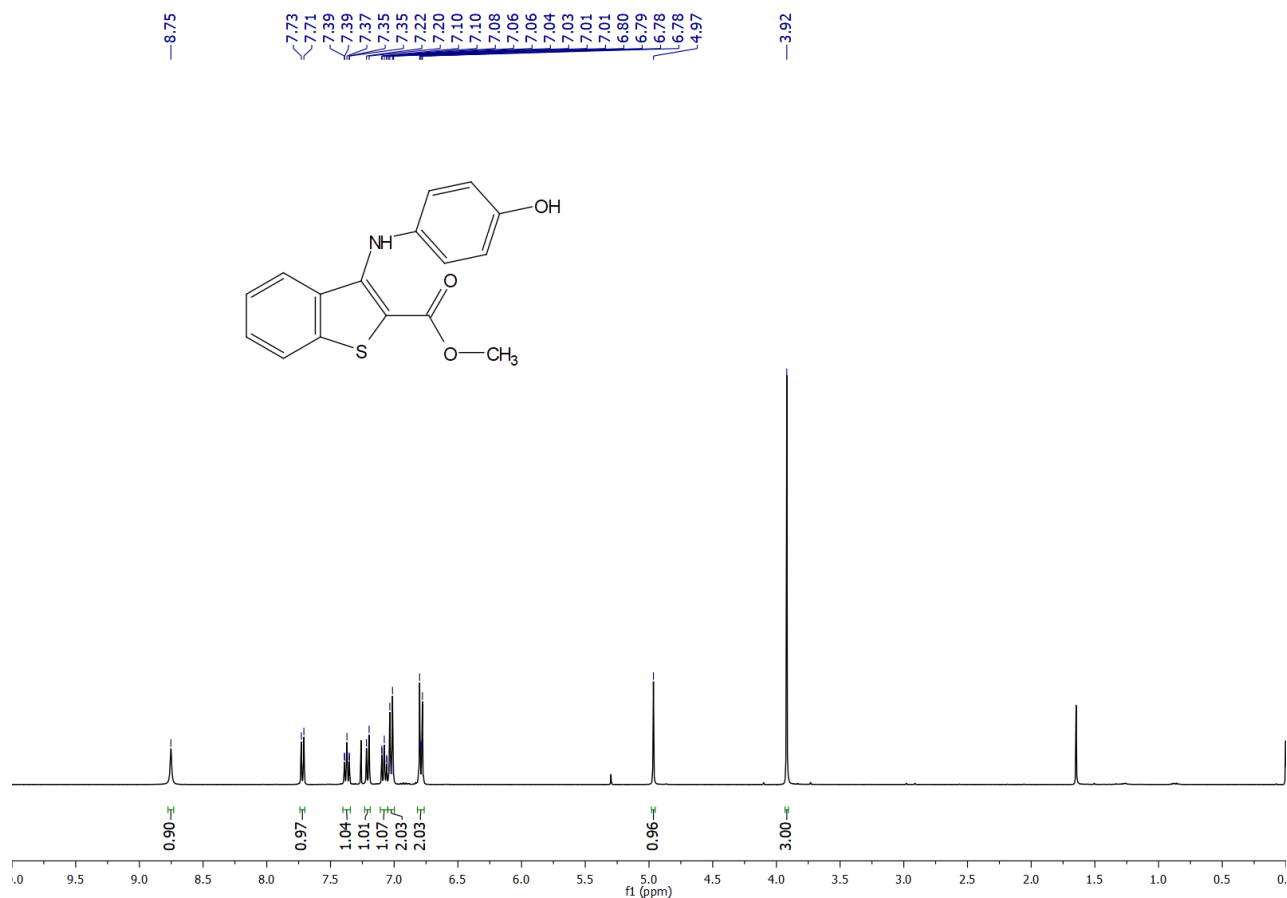

Figure S42. Methyl 3-[(4-hydroxyphenyl)amino]-1-benzothiophene-2-carboxylate (3m). <sup>1</sup>H NMR spectrum (400 MHz, CDCl<sub>3</sub>).

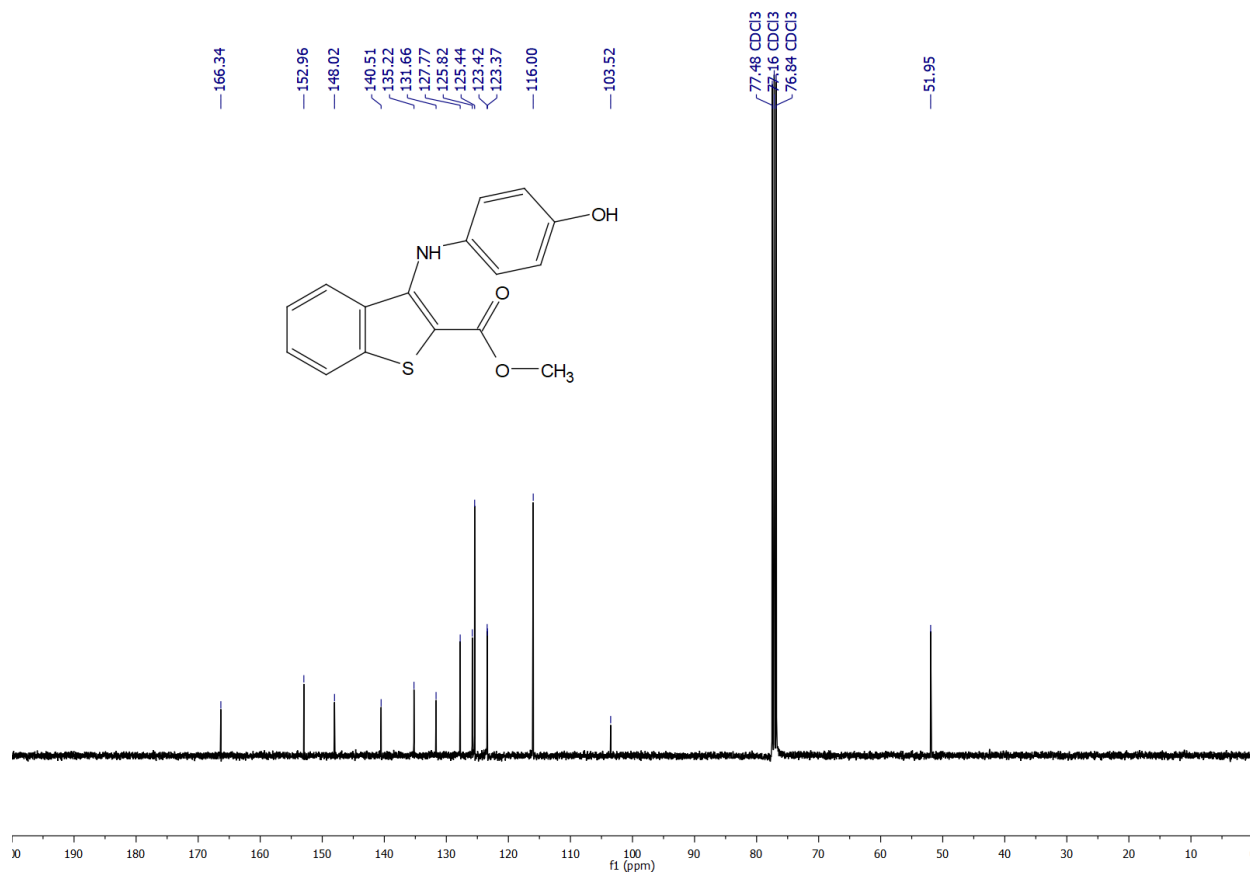

Figure S43. Methyl 3-[(4-hydroxyphenyl)amino]-1-benzothiophene-2-carboxylate (3m). <sup>13</sup>C NMR spectrum (100 MHz, CDCl<sub>3</sub>).

**Acquisition Parameter**

|             |          |                       |            |                  |           |
|-------------|----------|-----------------------|------------|------------------|-----------|
| Source Type | ESI      | Ion Polarity          | Positive   | Set Nebulizer    | 0.6 Bar   |
| Focus       | Active   | Set Capillary         | 4500 V     | Set Dry Heater   | 200 °C    |
| Scan Begin  | 50 m/z   | Set End Plate Offset  | -500 V     | Set Dry Gas      | 7.0 l/min |
| Scan End    | 1850 m/z | Set Collision Cell RF | 2500.0 Vpp | Set Divert Valve | Waste     |

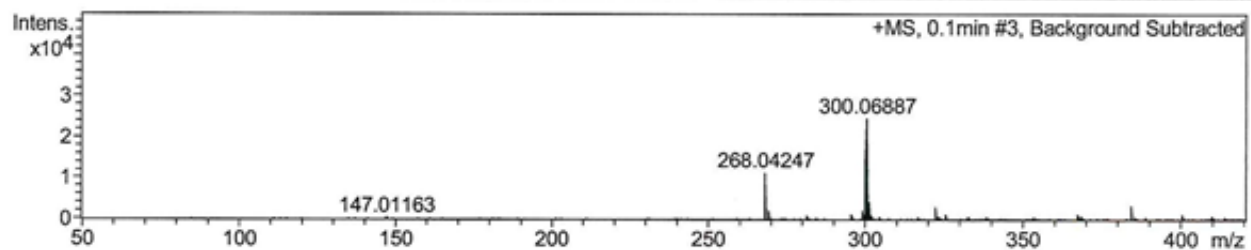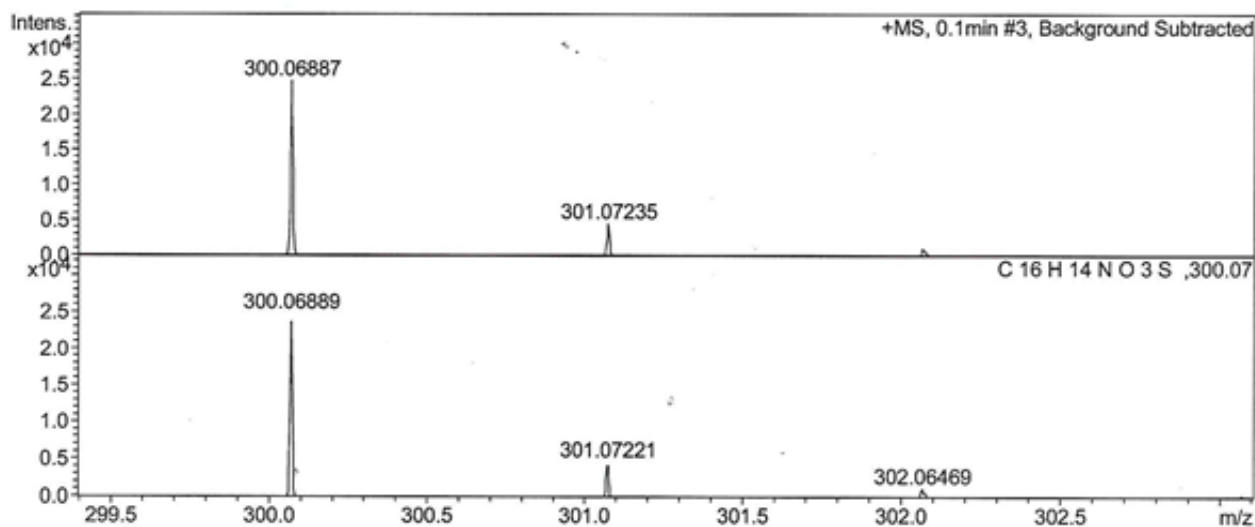

| Meas. m/z | # | Formula                                             | m/z       | err [ppm] | mSigma | rdb  | e <sup>-</sup> Conf | N-Rule |
|-----------|---|-----------------------------------------------------|-----------|-----------|--------|------|---------------------|--------|
| 268.04247 | 1 | C <sub>15</sub> H <sub>10</sub> NO <sub>2</sub> S   | 268.04268 | 0.78      | 32.3   | 11.5 | even                | ok     |
| 300.06887 | 1 | C <sub>16</sub> H <sub>14</sub> NO <sub>3</sub> S   | 300.06889 | 0.07      | 34.1   | 10.5 | even                | ok     |
| 322.05069 | 1 | C <sub>16</sub> H <sub>13</sub> NNaO <sub>3</sub> S | 322.05084 | 0.46      | 98.4   | 10.5 | even                | ok     |

Figure S44. Methyl 3-[(4-hydroxyphenyl)amino]-1-benzothiophene-2-carboxylate (3m). HRMS (ESI).

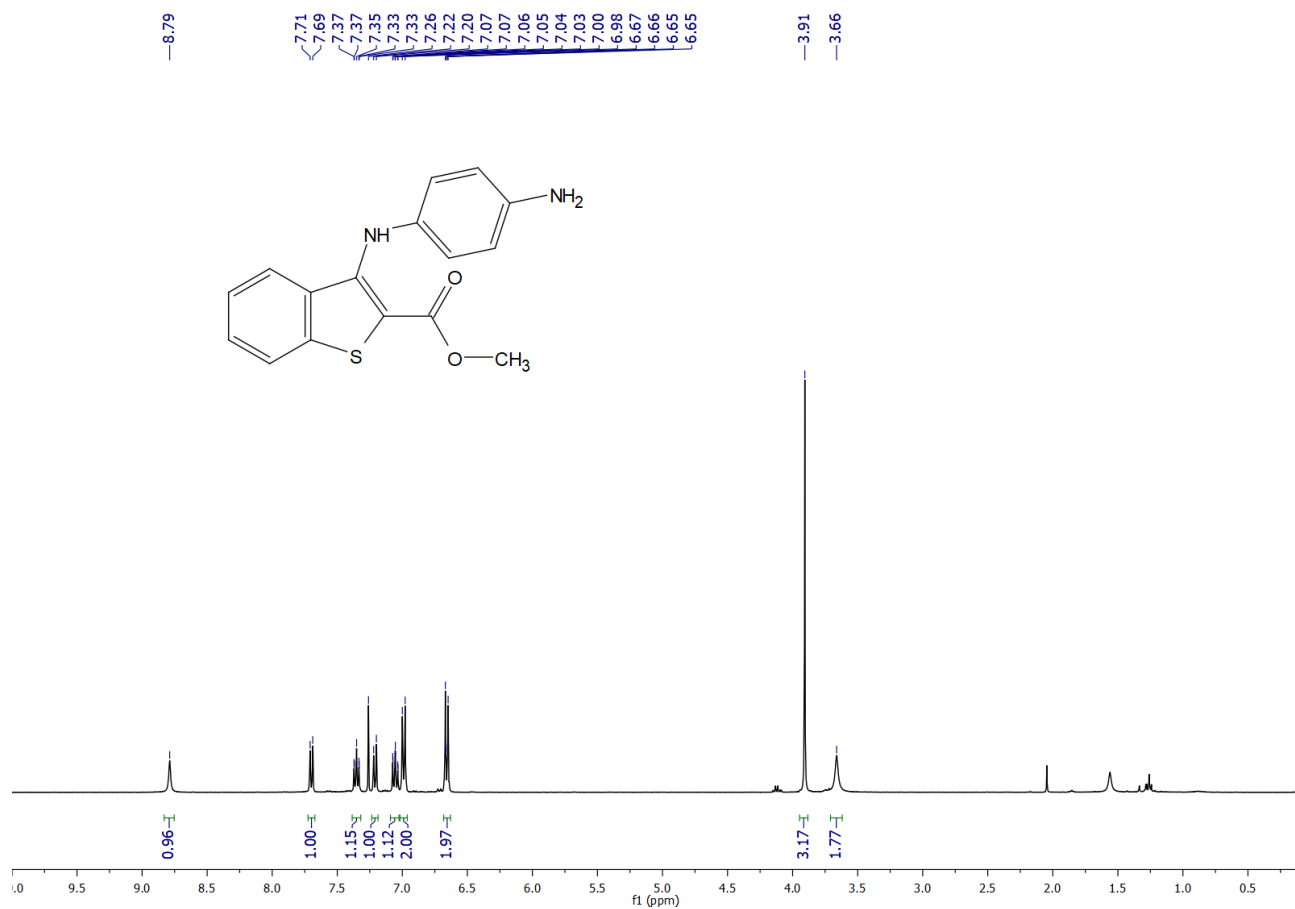

**Figure S45. Methyl 3-[(4-aminophenyl)amino]-1-benzothiophene-2-carboxylate (3n). <sup>1</sup>H NMR spectrum (400 MHz, CDCl<sub>3</sub>).**

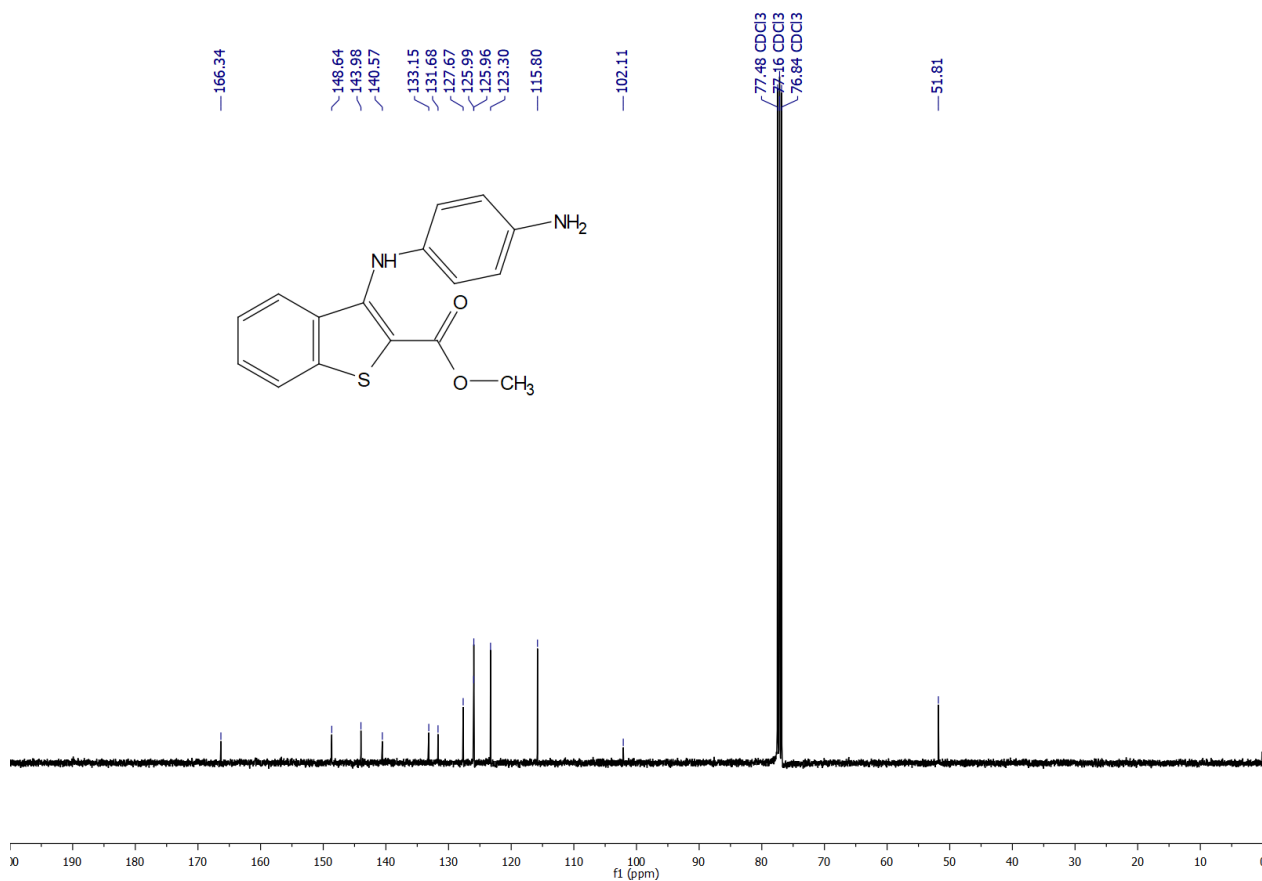

**Figure S46. Methyl 3-[(4-aminophenyl)amino]-1-benzothiophene-2-carboxylate (3n). <sup>13</sup>C NMR spectrum (100 MHz, CDCl<sub>3</sub>).**

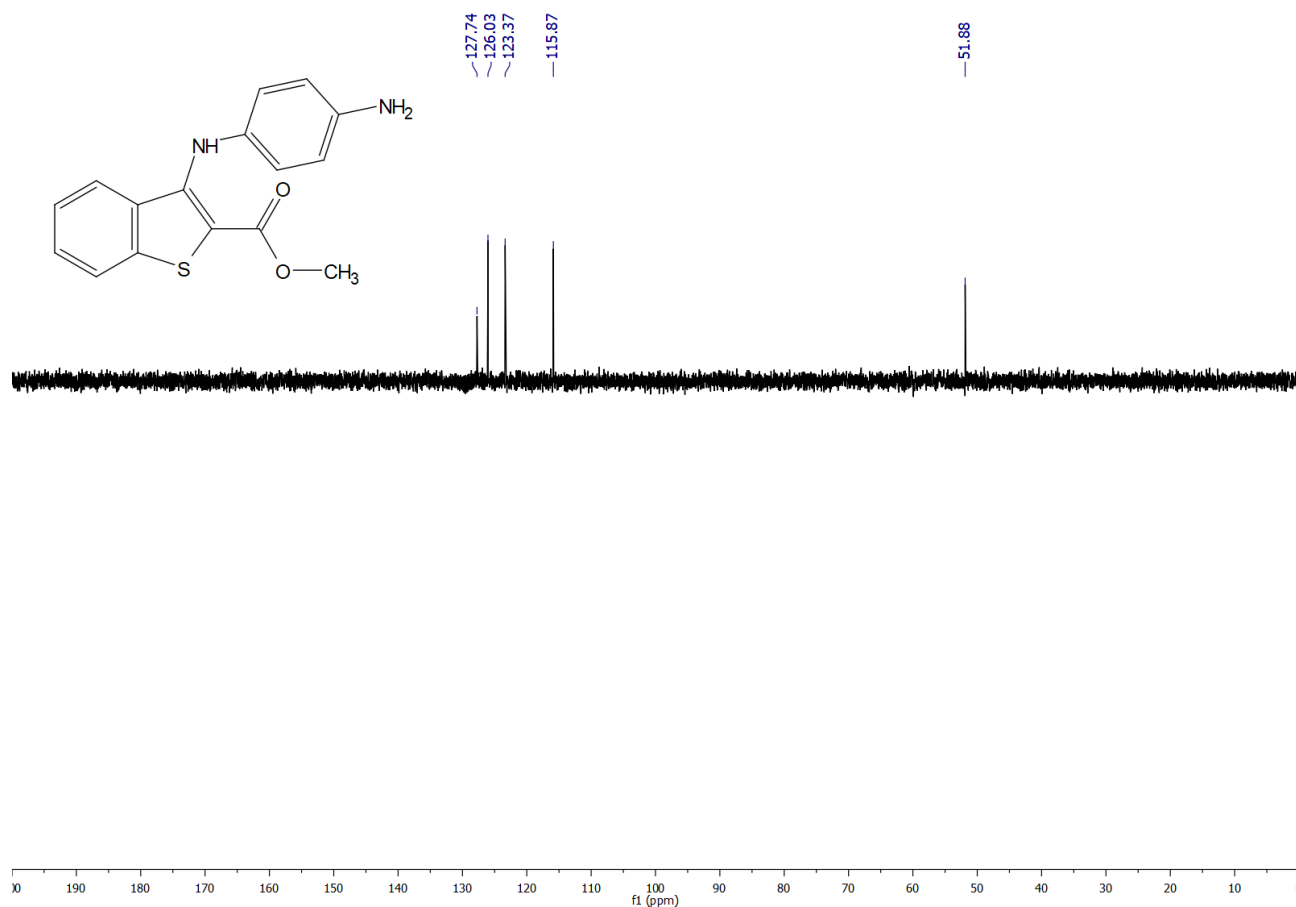

**Figure S47. Methyl 3-[(4-aminophenyl)amino]-1-benzothiophene-2-carboxylate (3n). DEPT135 spectrum (100 MHz, CDCl<sub>3</sub>).**

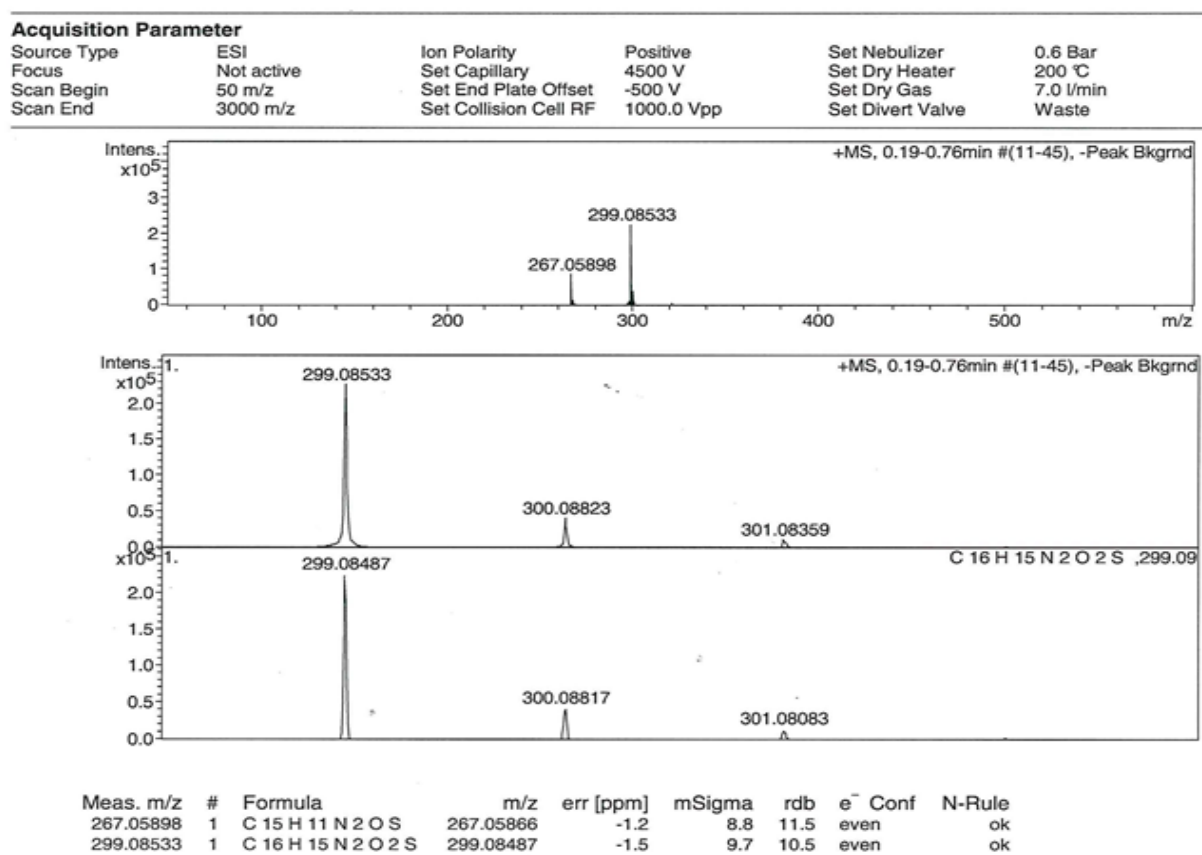

**Figure S48. Methyl 3-[(4-aminophenyl)amino]-1-benzothiophene-2-carboxylate (3n). HRMS (ESI).**

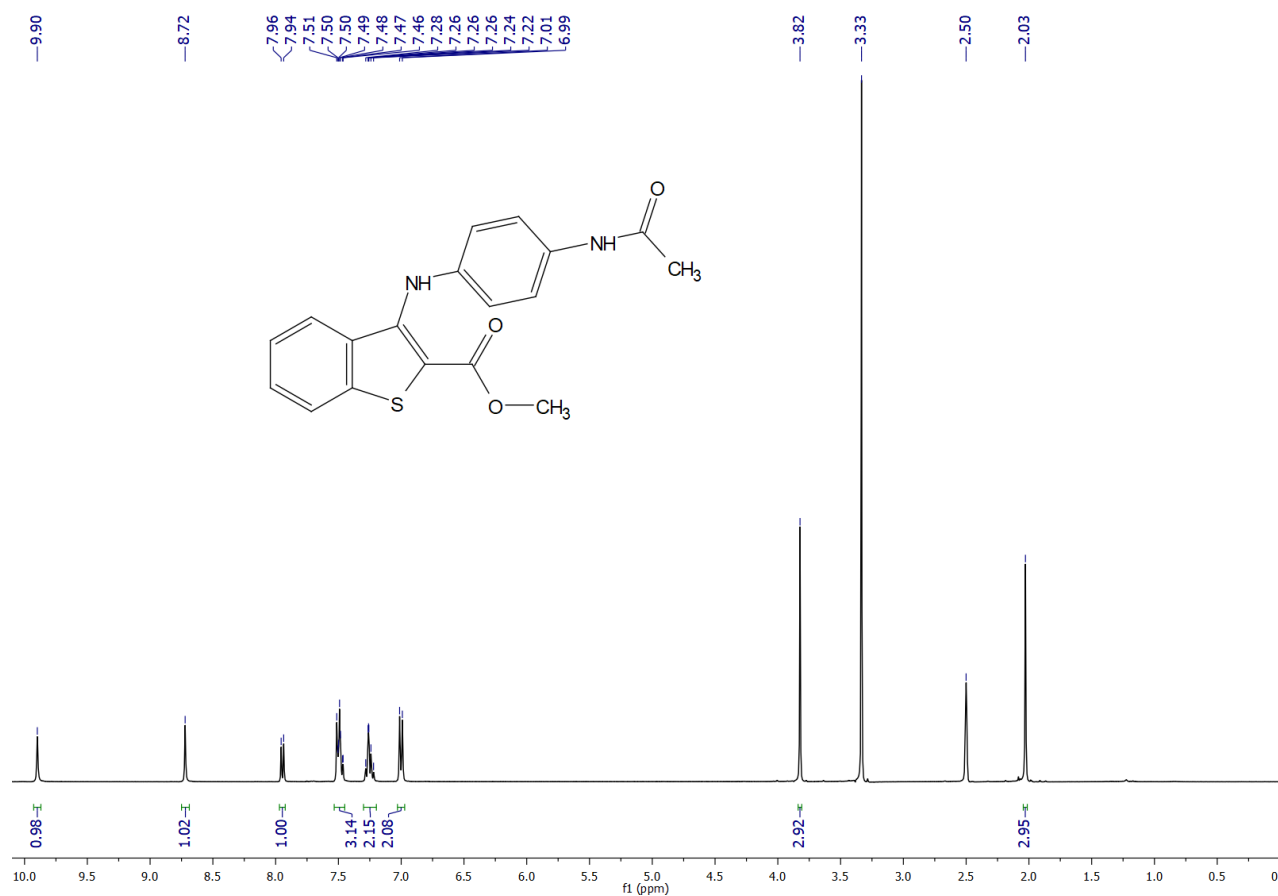

**Figure S49.** Methyl 3-([4-(acetamino)phenyl]amino)-1-benzothiophene-2-carboxylate (3o). <sup>1</sup>H NMR spectrum (400 MHz, DMSO-*d*<sub>6</sub>).

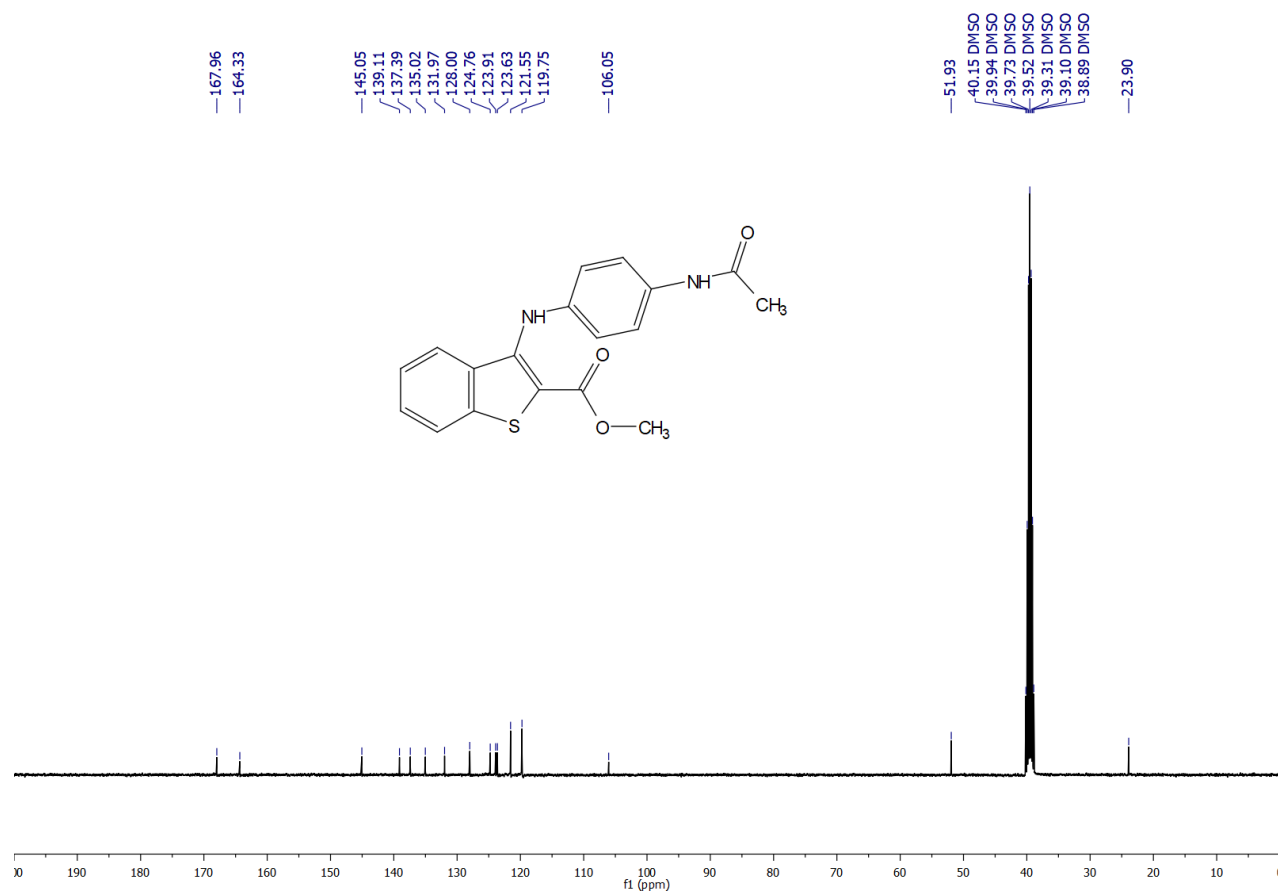

**Figure S50.** Methyl 3-([4-(acetamino)phenyl]amino)-1-benzothiophene-2-carboxylate (3o). <sup>13</sup>C NMR spectrum (100 MHz, DMSO-*d*<sub>6</sub>).

**Acquisition Parameter**

|             |            |                       |            |                  |           |
|-------------|------------|-----------------------|------------|------------------|-----------|
| Source Type | ESI        | Ion Polarity          | Positive   | Set Nebulizer    | 0.6 Bar   |
| Focus       | Not active | Set Capillary         | 4500 V     | Set Dry Heater   | 200 °C    |
| Scan Begin  | 50 m/z     | Set End Plate Offset  | -500 V     | Set Dry Gas      | 7.0 l/min |
| Scan End    | 3000 m/z   | Set Collision Cell RF | 1000.0 Vpp | Set Divert Valve | Waste     |

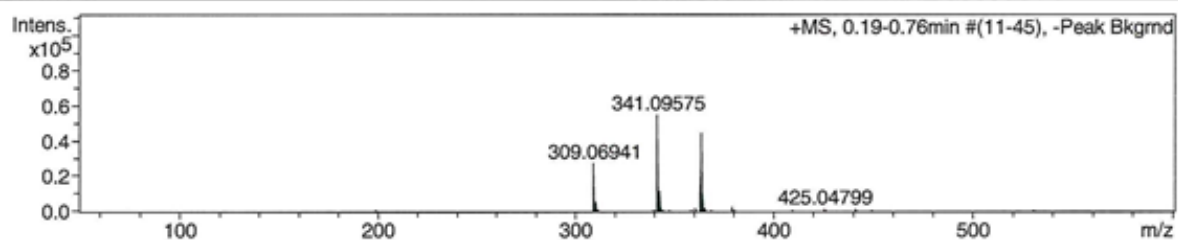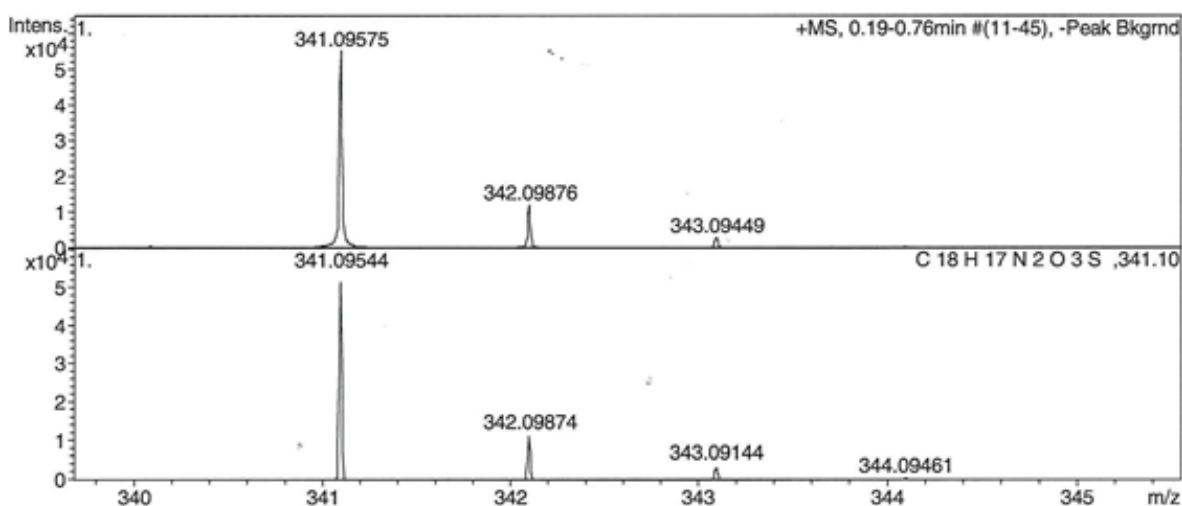

| Meas. m/z | # | Formula                | m/z       | err [ppm] | mSigma | rdb  | e <sup>-</sup> | Conf | N-Rule |
|-----------|---|------------------------|-----------|-----------|--------|------|----------------|------|--------|
| 309.06941 | 1 | C 17 H 13 N 2 O 2 S    | 309.06922 | -0.6      | 11.6   | 12.5 | even           |      | ok     |
| 341.09575 | 1 | C 18 H 17 N 2 O 3 S    | 341.09544 | -0.9      | 12.2   | 11.5 | even           |      | ok     |
| 363.07767 | 1 | C 18 H 16 N 2 Na O 3 S | 363.07738 | -0.8      | 14.9   | 11.5 | even           |      | ok     |

**Figure S51. Methyl 3-[[4-(acetylamino)phenyl]amino]-1-benzothiophene-2-carboxylate (3o). HRMS (ESI).**

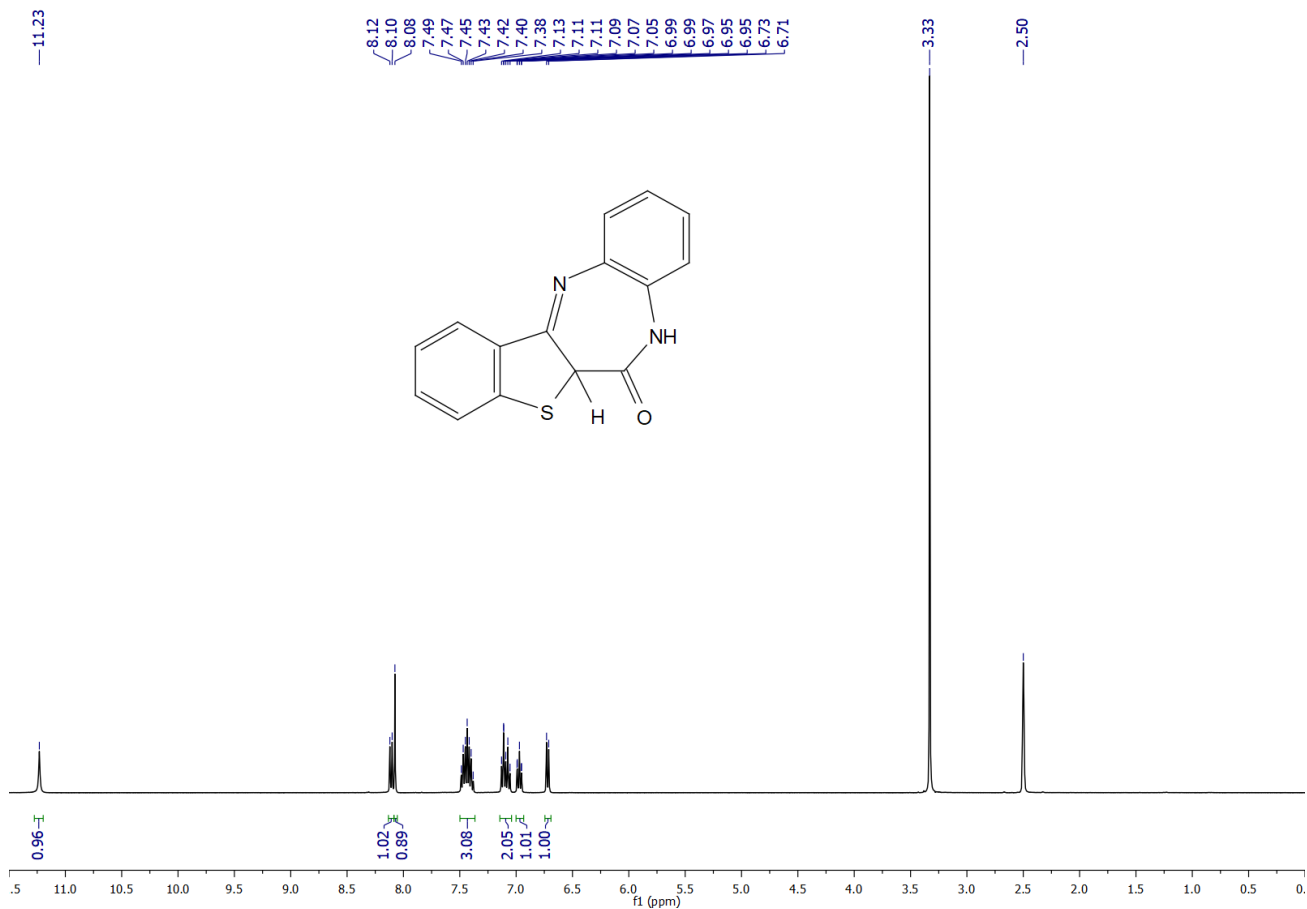

Figure S52. 5a,7-dihydro-6H-[1]benzothieno[2,3-b][1,5]benzodiazepin-6-one (4).  $^1\text{H}$  NMR spectrum (400 MHz,  $\text{DMSO}-d_6$ ).

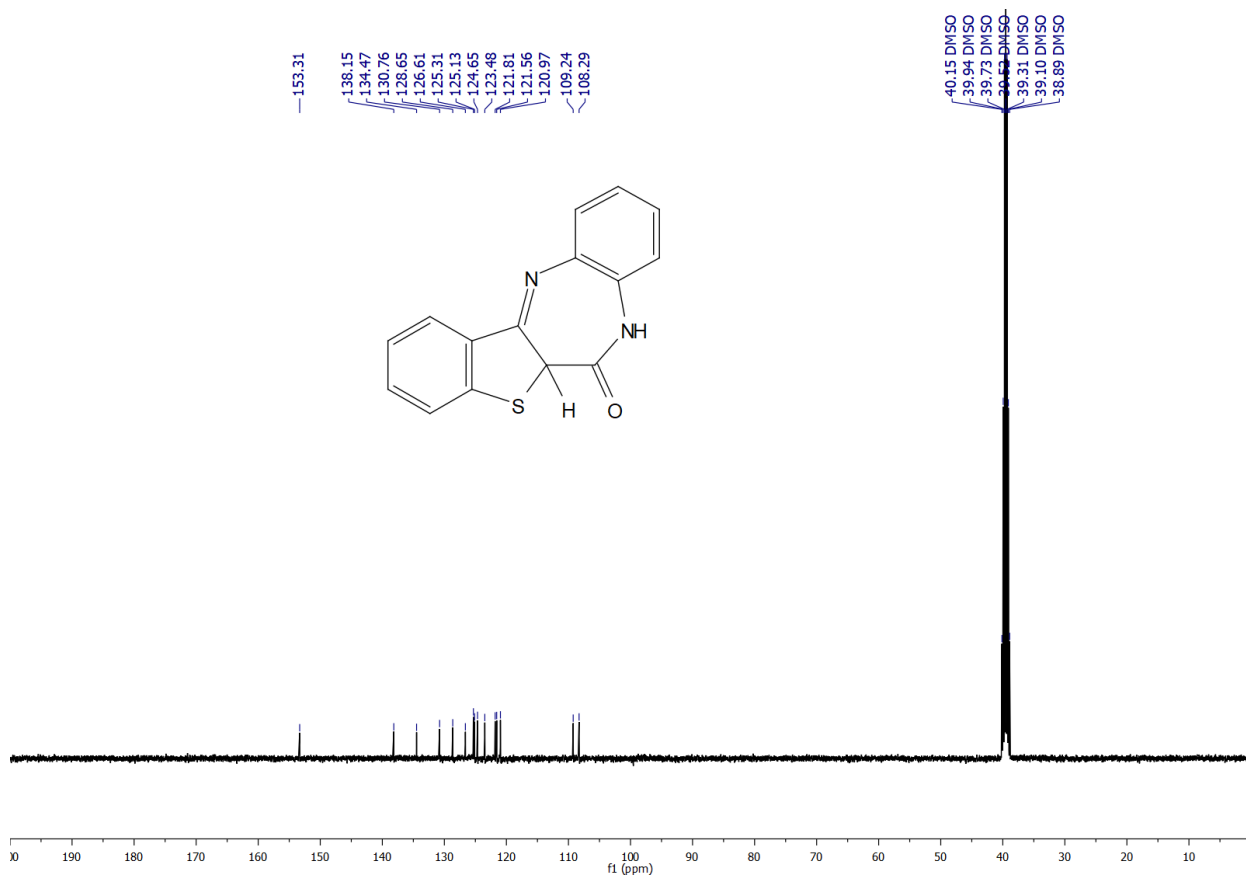

Figure S53. 5a,7-dihydro-6H-[1]benzothieno[2,3-b][1,5]benzodiazepin-6-one (4).  $^{13}\text{C}$  NMR spectrum (100 MHz,  $\text{DMSO}-d_6$ ).



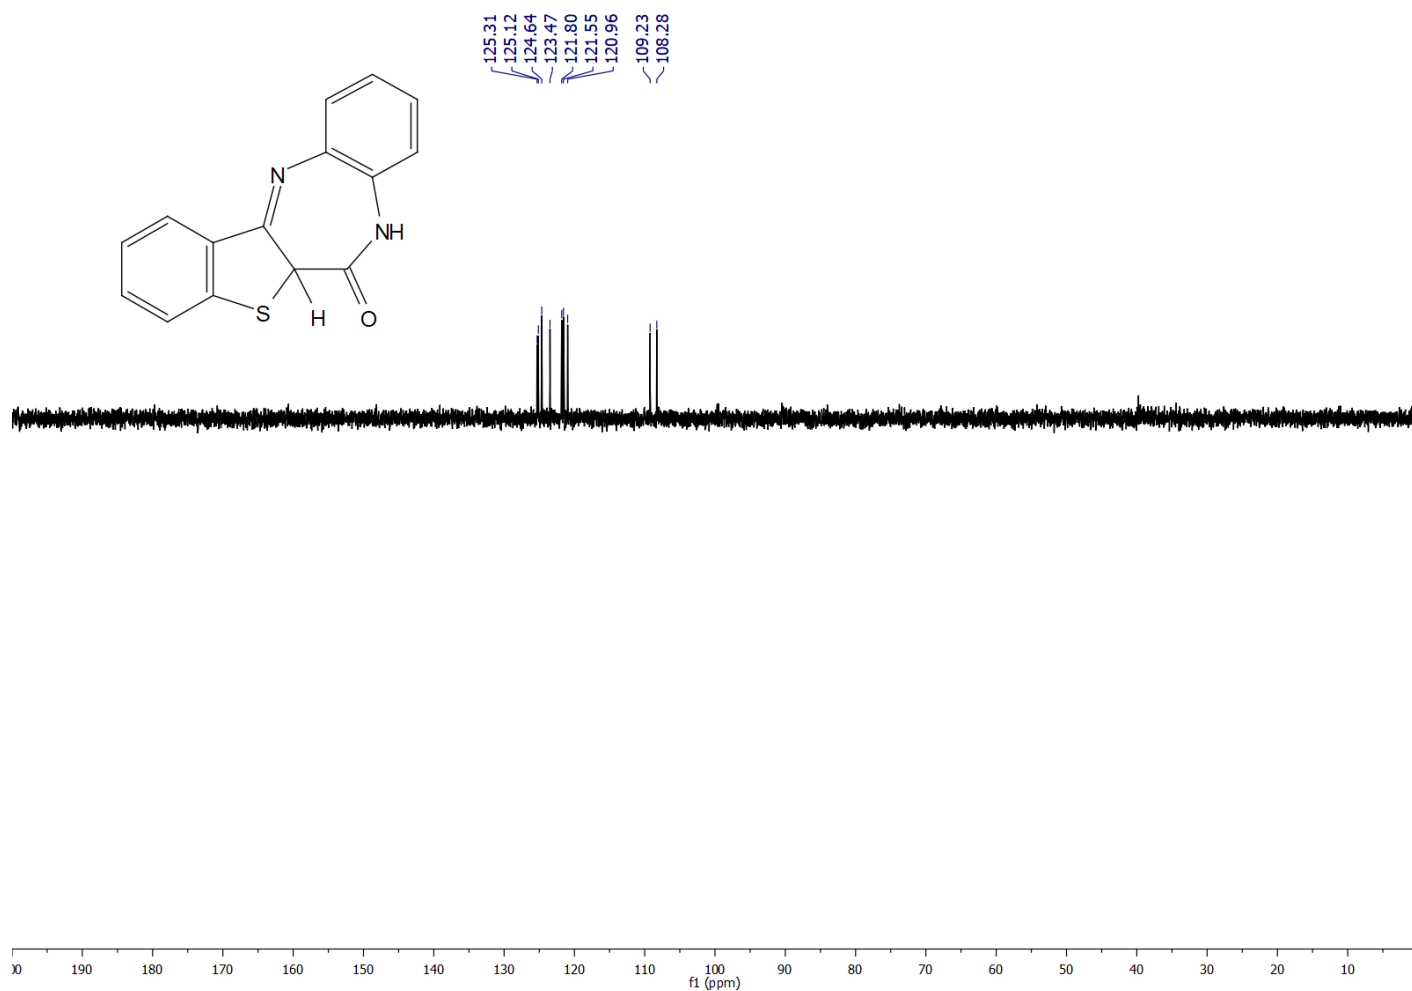

**Figure S54.** 5a,7-dihydro-6H-[1]benzothieno[2,3-*b*][1,5]benzodiazepin-6-one (4). DEPT135 spectrum (100 MHz, DMSO- $d_6$ ).

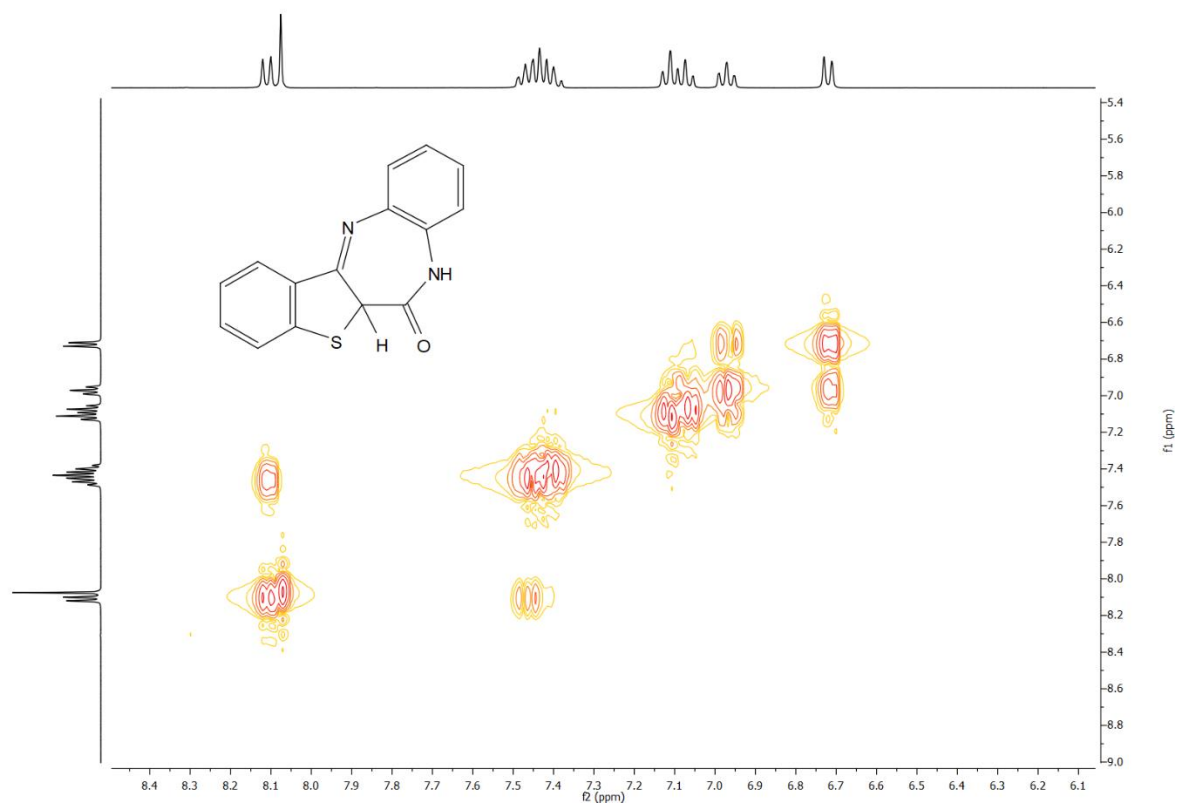

**Figure S55.** 5a,7-dihydro-6H-[1]benzothieno[2,3-*b*][1,5]benzodiazepin-6-one (4). COSY.

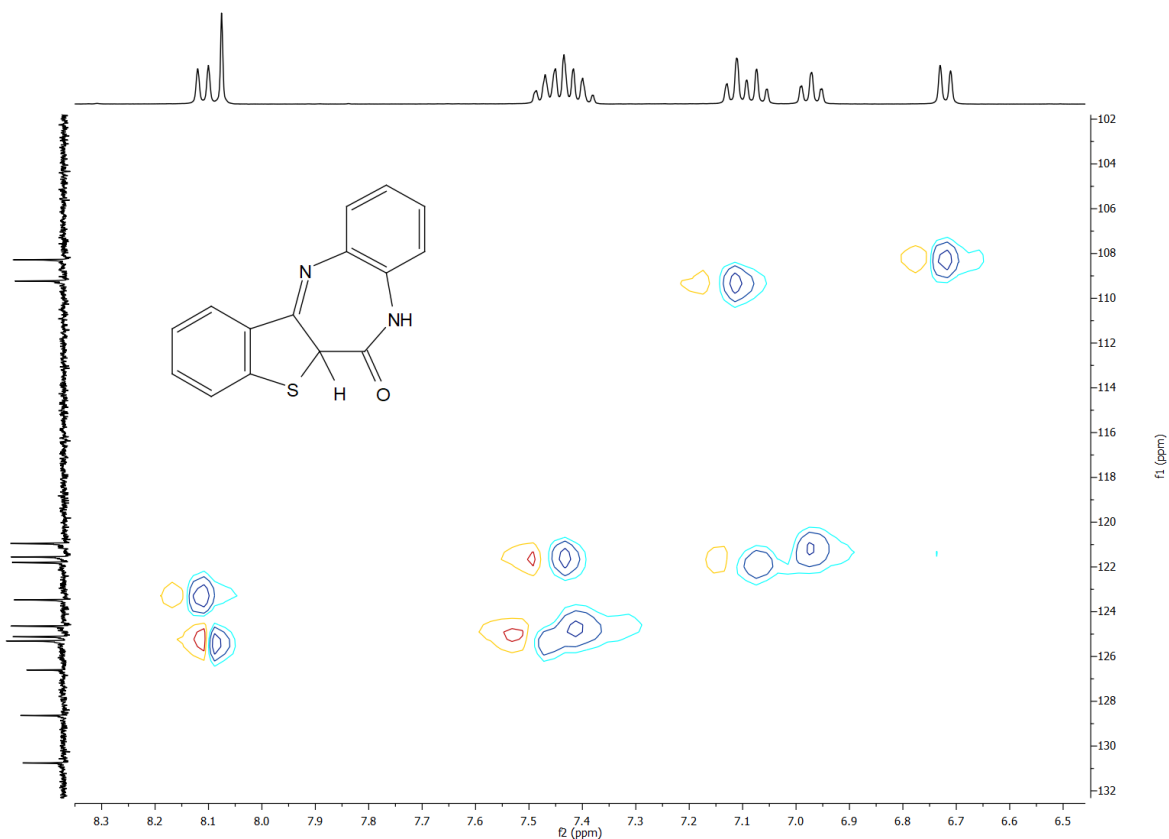

Figure S56. 5a,7-dihidro-6H-[1]benzothieno[2,3-b][1,5]benzodiazepin-6-one (4). HSQC.

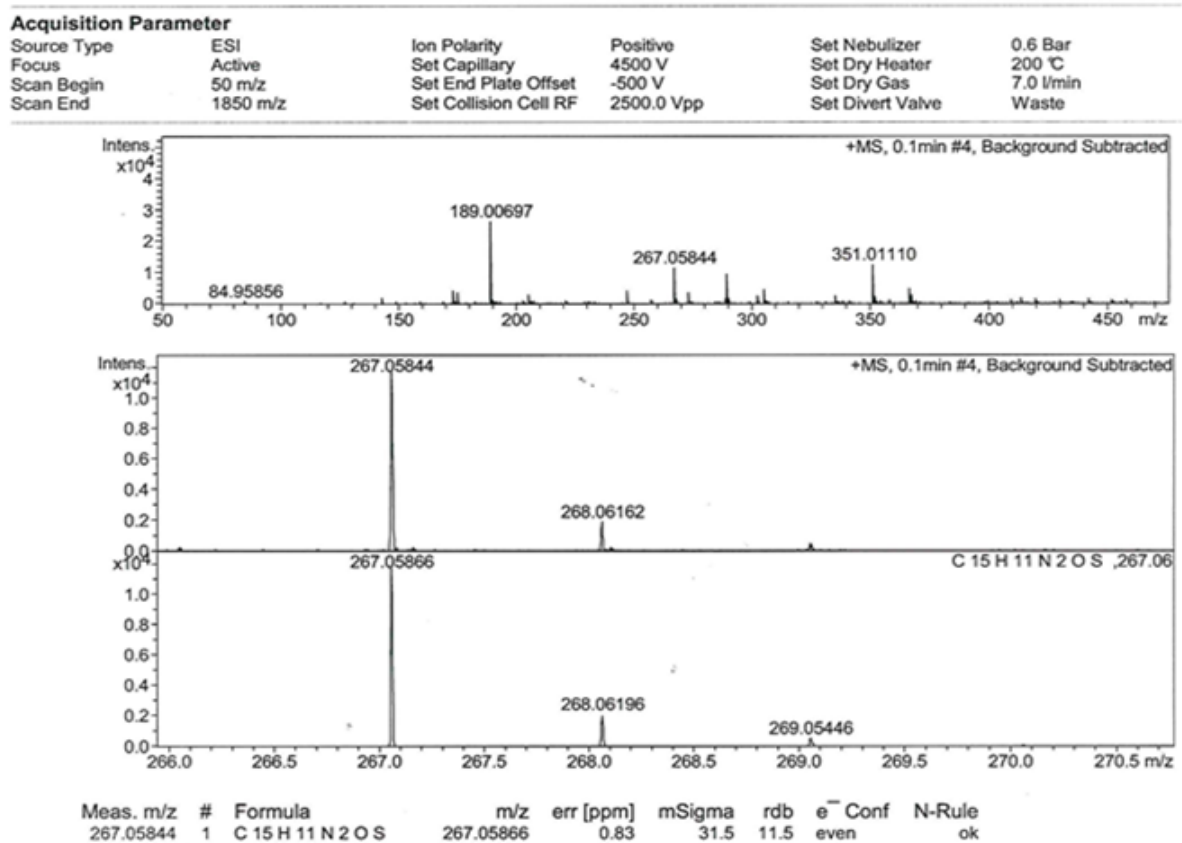

Figure S57. 5a,7-dihidro-6H-[1]benzothieno[2,3-b][1,5]benzodiazepin-6-one (4). HRMS (ESI).

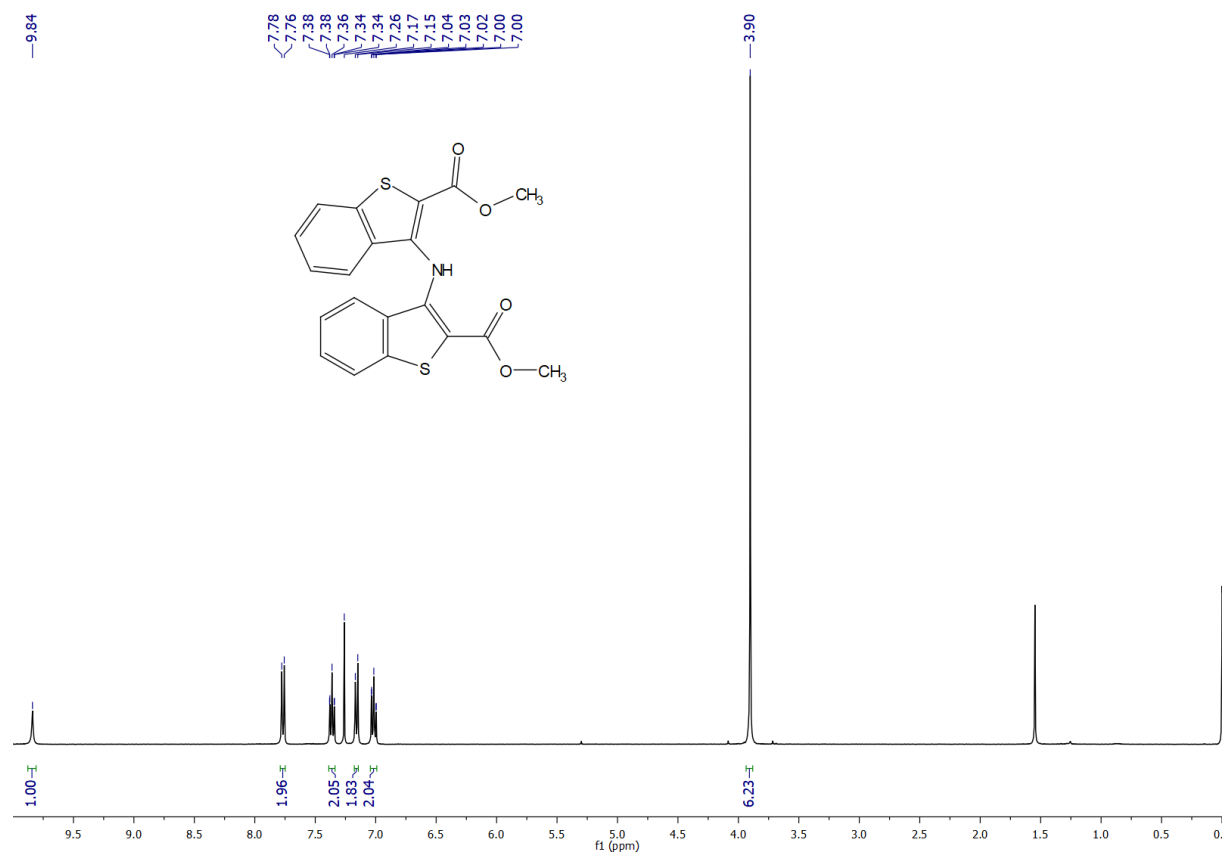

**Figure S58.** Dimethyl 3,3'-iminobis(benzo[*b*]thiophene-2-carboxylate) (5). <sup>1</sup>H NMR spectrum (400 MHz, CDCl<sub>3</sub>).

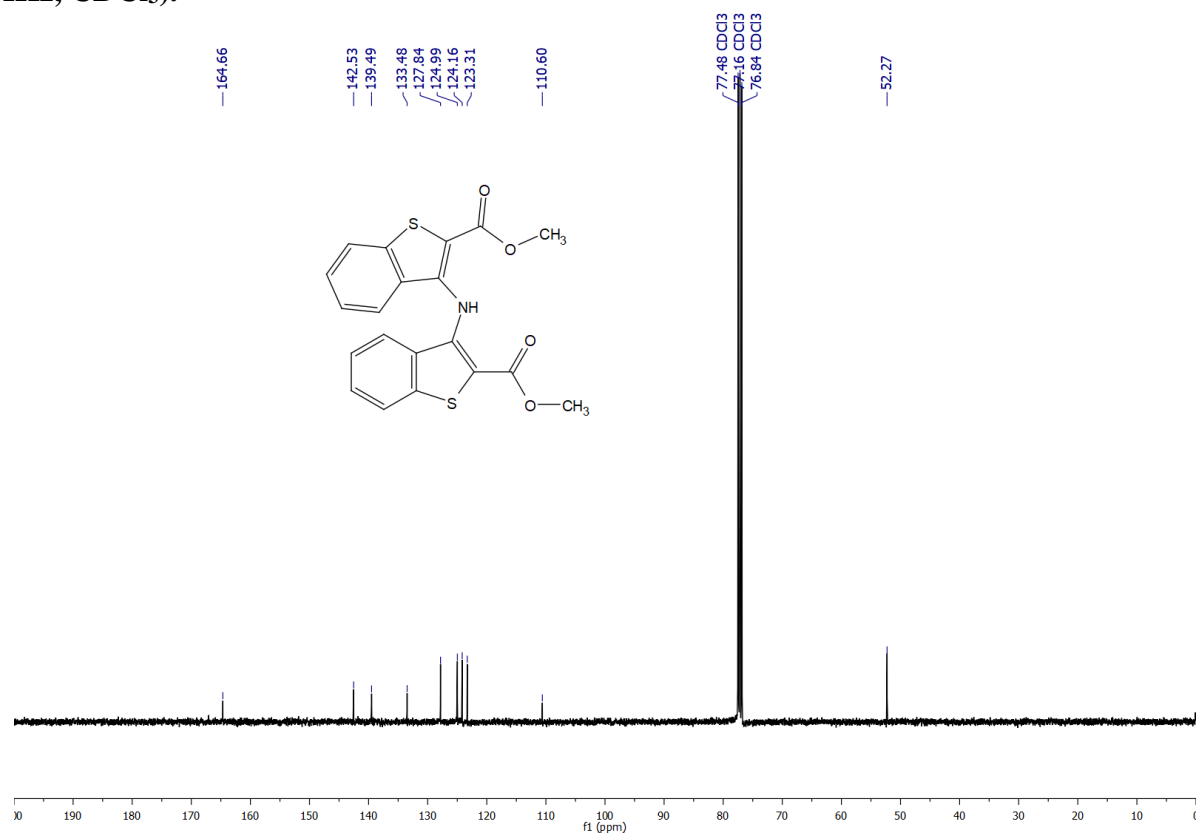

**Figure S59.** Dimethyl 3,3'-iminobis(benzo[*b*]thiophene-2-carboxylate) (5). <sup>13</sup>C NMR spectrum (100 MHz, CDCl<sub>3</sub>).

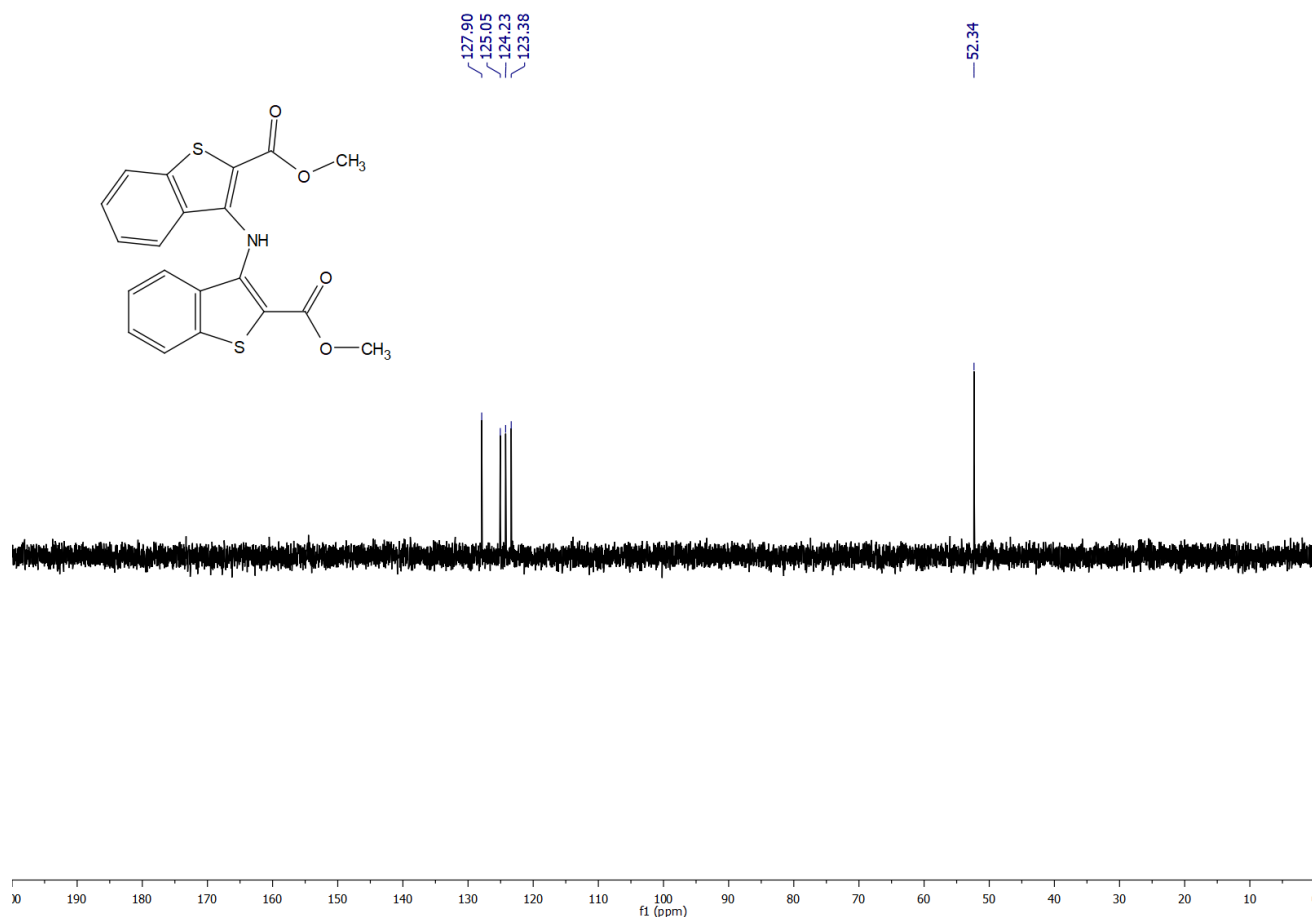

**Figure S60. Dimethyl 3,3'-iminobis(benzo[b]thiophene-2-carboxylate) (5). DEPT135 spectrum (100 MHz, CDCl<sub>3</sub>).**

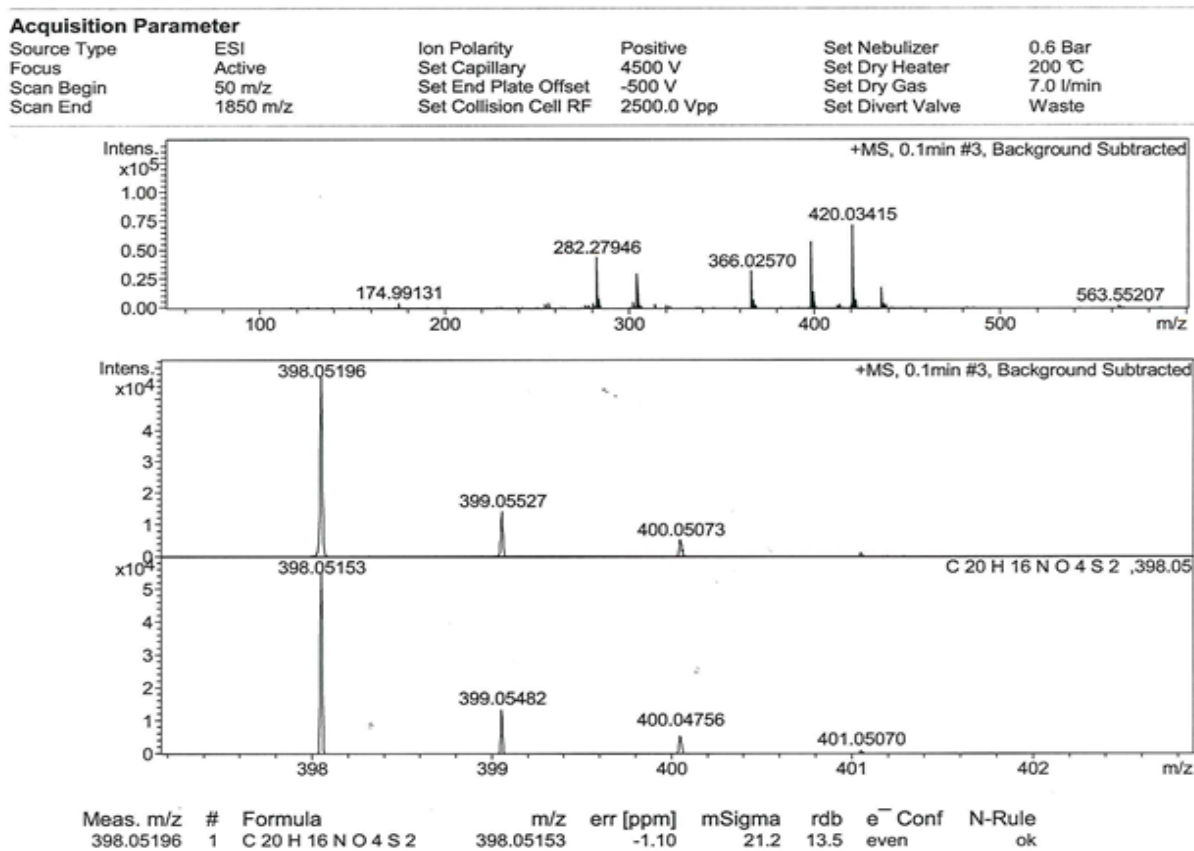

**Figure S61. Dimethyl 3,3'-iminobis(benzo[b]thiophene-2-carboxylate) (5). HRMS (ESI).**
